# Supplementary material
Source: publisher figshare collection journal article supplement (https://rs.figshare.com/ndownloader/files/13877378)
Supplement: Supplementary file 1 [file 13877378]

## Sheet: HEADER_DETAILS
Header	Details
Rec_No	Record ID
Taxon	Taxon name (binomial) used in this study
Source_bite_force	Source for bite force data
Taxon_from_source	Taxon name used in the source material
Image_source	Source for images used to calculate bite force
Taxon_to_USE	Taxon names to use if taxon name in source is not preferred for any reason - e.g., out-dated, misspelt, synonym etc
Individual	Individual specimen identifier - e.g., specimen number
Group3	3-Group categories (Mammals, Reptiles, Dinosaurs)
Group4	4-Group categories (Mammals, Reptiles, Dinosaurs, Birds)
Group5	5-Group categories (Mammals, Bats, Reptiles, Dinosaurs, Finches)
Method	Method for bite force acquisition
BiteType	In vivo vs estimate
F_Bite_posterior_from_source	Bite force value at posterior-most biting position taken from source
F_Bite_mid_from_source	Bite force value at mid-point biting position taken from source
F_Bite_anterior_from_source	Bite force value at anterior biting position taken from source
bite_pos_max	Biting position at which maximum bite force is available - e.g., if posterior bite force is available then P, if max bite force is from anterior position then A
bite_pos_functional	Biting position for a functional bite force, that is, even if a posterior bite force (max bite force) exists, if a more anterior position is considered to be the functional bite force, that position is indicated here. For instance, if an animal predominantly uses canines to bite over molars...
BitePoint	Bite point coding for the corresponding bite force record
F_Bite_max	Maximum bite force from source
F_Bite_functional	Functional bite force from source
F_Bite_max_corrected	Maximum bite force corrected for any biases or standardisation necessary - see Manuscript text and comments on PRIMARY_DATA tab
F_Bite_corrected	Functional bite force corrected for any biases or standardisation necessary - see Manuscript text and comments on PRIMARY_DATA tab
F_Bite2	Maximum bite force FINAL: Maximum bite force to use in analyses. Chosen either from source or after correction <-- USE THIS ONE
F_Bite1	Functional bite force FINAL
L_Sk	Length of the skull
W_Sk	Width of the skull
H_Sk	Height of the skull
SVL	Snout-Vent length
sex	Sex info if available
Mass_g	Body mass in grams
M_Body	Body mass in Kg
Source_M_Body	Source for body mass data
use	Code to indicate whether or not to use bite force record to match with phylogeny
reason_for_exclusion	Reasons for excluding bite force record from further analyses
Matched_with_Tree	Whether or not taxon name matches with the phylogeny
Taxon_Representative	Code to indicate whether or not the bite force record is used as the taxon representative

## Sheet: PRIMARY_DATA
Rec_No	Taxon	Source_bite_force	Taxon_from_source	Image_source	Taxon_to_USE	Individual	Group3	Group4	Group5	Method	BiteType	F_Bite_posterior_from_source	F_Bite_mid_from_source	F_Bite_anterior_from_source	bite_pos_max	bite_pos_functional	BitePoint	F_Bite_max	F_Bite_functional	F_Bite_max_corrected	F_Bite_corrected	F_Bite2	F_Bite1	L_Sk	W_Sk	H_Sk	SVL	sex	Mass_g	M_Body	Source_M_Body	use	reason_for_exclusion	Matched_with_Tree	Taxon_Representative
1	Homo_sapiens	Ringqvist 1972	Homo_sapiens				Mammals	Mammals	Mammals	NA	NA	294			P	P	P	294	294			294	294						55000	55	Huber et al. 2005	0	methodology unclear	0	0
2	Rattus_norvegicus	Robins 1977	Rattus_norvegicus				Mammals	Mammals	Mammals	NA	NA			47	A	A	A	47	47			47	47						555	0.555	Huber et al. 2005	0	methodology unclear	0	0
3	Didelphis_virginiana	Thomason et al. 1990	Didelphis_virginiana				Mammals	Mammals	Mammals	in_vivo	in_vivo	442			P	P	P	442	442			442	442						5000	5	Huber et al. 2005	1		1	1
4	Crocuta_crocuta	Binder and Van Valkenburgh 2000	Crocuta_crocuta				Mammals	Mammals	Mammals	in_vivo	in_vivo			242	A	A	A	242	242			242	242						20700	20.7	Huber et al. 2005	0	juvenile	0	0
5	Crocuta_crocuta	Binder and Van Valkenburgh 2000	Crocuta_crocuta				Mammals	Mammals	Mammals	in_vivo	in_vivo			2195	A	A	A	2195	2195			2195	2195						292000	292	Huber et al. 2005	1		1	1
6	Monodelphis_domestica	Thompson et al. 2003	Monodelphis_domestica				Mammals	Mammals	Mammals	in_vivo	in_vivo	31.26	25.12	20.78	P	A	P	31.26	20.78			31.26	20.78						90	0.09	Thompson et al. 2003	1		1	1
7	Gallotia_galloti	Herrel et al. 1999	Gallotia_galloti				Reptiles	Reptiles	Reptiles	in_vivo	in_vivo			33.51	A	A	A	33.51	33.51			33.51	33.51	22.13	14.13	11.22	93.33	F	58	0.058	Huber et al. 2005	1		1	0
8	Gallotia_galloti	Herrel et al. 1999	Gallotia_galloti				Reptiles	Reptiles	Reptiles	in_vivo	in_vivo			108.57	A	A	A	108.57	108.57			108.57	108.57	28.18	18.62	14.79	109.65	M	58	0.058	Huber et al. 2005	1		1	1
9	Xenosaurus_grandis	Herrel et al. 2001	Xenosaurus_grandis				Reptiles	Reptiles	Reptiles	in_vivo	in_vivo			18.3	A	A	A	18.3	18.3			18.3	18.3	26.95	21.84	13.16	112.49	F	17	0.017	Huber et al. 2005	1		1	0
10	Xenosaurus_grandis	Herrel et al. 2001	Xenosaurus_grandis				Reptiles	Reptiles	Reptiles	in_vivo	in_vivo			18.94	A	A	A	18.94	18.94			18.94	18.94	26.45	21.63	13.18	109.78	M	17	0.017	Huber et al. 2005	1		1	1
11	Xenosaurus_newmanorum	Herrel et al. 2001	Xenosaurus_newmanorum				Reptiles	Reptiles	Reptiles	in_vivo	in_vivo			13.36	A	A	A	13.36	13.36			13.36	13.36	22.39	17.72	10.89	90.09	F	27	0.027	Huber et al. 2005	1		0	0
12	Xenosaurus_newmanorum	Herrel et al. 2001	Xenosaurus_newmanorum				Reptiles	Reptiles	Reptiles	in_vivo	in_vivo			20.38	A	A	A	20.38	20.38			20.38	20.38	28.06	21.65	13.31	106.42	M	27	0.027	Huber et al. 2005	1		0	0
13	Xenosaurus_platyceps	Herrel et al. 2001	Xenosaurus_platyceps				Reptiles	Reptiles	Reptiles	in_vivo	in_vivo			11.34	A	A	A	11.34	11.34			11.34	11.34	23.11	18.99	10.66	98.54	F	25	0.025	Huber et al. 2005	1		1	0
14	Xenosaurus_platyceps	Herrel et al. 2001	Xenosaurus_platyceps				Reptiles	Reptiles	Reptiles	in_vivo	in_vivo			12.43	A	A	A	12.43	12.43			12.43	12.43	22.35	19.62	10.37	89.37	M	25	0.025	Huber et al. 2005	1		1	1
15	Amyda_cartilaginea	Herrel et al. 2002	Amyda_cartilaginea				Reptiles	Reptiles	Reptiles	in_vivo	in_vivo			210	A	A	A	210	210			210	210	46.62	32.05	27.2			937	0.937	Herrel et al. 2002	1		0	0
16	Apalone_ferox	Herrel et al. 2002	Apalone_ferox				Reptiles	Reptiles	Reptiles	in_vivo	in_vivo			42	A	A	A	42	42			42	42	29.76	15.85	11.9			114	0.114	Herrel et al. 2002	1		1	1
17	Apalone_spinifera	Herrel et al. 2002	Apalone_spinifera				Reptiles	Reptiles	Reptiles	in_vivo	in_vivo			12	A	A	A	12	12			12	12	40.47	21.18	14.75			260	0.26	Herrel et al. 2002	1		0	0
18	Batagur_borneoensis	Herrel et al. 2002	Callagur_borneoensis		Batagur_borneoensis		Reptiles	Reptiles	Reptiles	in_vivo	in_vivo			147	A	A	A	147	147			147	147	87.05	52.45	45.85			10065	10.065	Herrel et al. 2002	1		1	1
19	Chelus_fimbriata	Herrel et al. 2002	Chelus_fimbriatus		Chelus_fimbriata		Reptiles	Reptiles	Reptiles	in_vivo	in_vivo			5	A	A	A	5	5			5	5	38.31	45.91	20.61			405	0.405	Herrel et al. 2002	1		1	1
20	Chelydra_serpentina	Herrel et al. 2002	Chelydra_serpentina				Reptiles	Reptiles	Reptiles	in_vivo	in_vivo			209	A	A	A	209	209			209	209	65.45	51.26	34.8			3940	3.94	Herrel et al. 2002	1		1	1
21	Mauremys_reevesii	Herrel et al. 2002	Chinemys_reevesii		Mauremys_reevesii		Reptiles	Reptiles	Reptiles	in_vivo	in_vivo			20	A	A	A	20	20			20	20	20.47	18.01	13.17			137	0.137	Herrel et al. 2002	1		1	1
22	Dogania_subplana	Herrel et al. 2002	Dogania_subplana				Reptiles	Reptiles	Reptiles	in_vivo	in_vivo			37	A	A	A	37	37			37	37	46.48	30.52	20.53			328	0.328	Herrel et al. 2002	1		1	1
23	Elseya_novaeguineae	Herrel et al. 2002	Elseya_novaeguineae				Reptiles	Reptiles	Reptiles	in_vivo	in_vivo			35	A	A	A	35	35			35	35	40.16	27.56	21.39			743	0.743	Herrel et al. 2002	1		0	0
24	Emydura_subglobosa	Herrel et al. 2002	Emydura_subglobosa				Reptiles	Reptiles	Reptiles	in_vivo	in_vivo			2	A	A	A	2	2			2	2	25.52	17.23	13.07			119	0.119	Herrel et al. 2002	1		0	0
25	Geoemyda_spengleri	Herrel et al. 2002	Geoemyda_spengleri				Reptiles	Reptiles	Reptiles	in_vivo	in_vivo			12	A	A	A	12	12			12	12	26.07	15.54	14.16			126	0.126	Herrel et al. 2002	1		0	0
26	Heosemys_grandis	Herrel et al. 2002	Heosemys_grandis				Reptiles	Reptiles	Reptiles	in_vivo	in_vivo			102	A	A	A	102	102			102	102	65.67	42	31.4			2866	2.866	Herrel et al. 2002	1		0	0
27	Kinosternon_scorpioides	Herrel et al. 2002	Kinosternon_scorpioides				Reptiles	Reptiles	Reptiles	in_vivo	in_vivo			38	A	A	A	38	38			38	38	30.81	22.41	15.7			214	0.214	Herrel et al. 2002	1		0	0
28	Kinosternon_subrubrum	Herrel et al. 2002	Kinosternon_subrubrum				Reptiles	Reptiles	Reptiles	in_vivo	in_vivo			35	A	A	A	35	35			35	35	32.16	21.4	16.92			133	0.133	Herrel et al. 2002	1		0	0
29	Macrochelys_temminckii	Herrel et al. 2002	Macrochelys_temminckii				Reptiles	Reptiles	Reptiles	in_vivo	in_vivo			158	A	A	A	158	158			158	158	57.16	46.82	35.8			388	0.388	Herrel et al. 2002	1		1	1
30	Orlitia_borneensis	Herrel et al. 2002	Orlitia_borneensis				Reptiles	Reptiles	Reptiles	in_vivo	in_vivo			117	A	A	A	117	117			117	117	81.62	47.54	48.19			3818	3.818	Herrel et al. 2002	1		0	0
31	Pelodiscus_sinensis	Herrel et al. 2002	Pelodiscus_sinensis				Reptiles	Reptiles	Reptiles	in_vivo	in_vivo			59	A	A	A	59	59			59	59	40.02	27.29	19.47			305	0.305	Herrel et al. 2002	1		1	1
32	Pelomedusa_subrufa	Herrel et al. 2002	Pelomedusa_subrufa				Reptiles	Reptiles	Reptiles	in_vivo	in_vivo			8	A	A	A	8	8			8	8	30.41	25.46	14.86			224	0.224	Herrel et al. 2002	1		1	1
33	Phrynops_nasutus	Herrel et al. 2002	Phrynops_nasutus				Reptiles	Reptiles	Reptiles	in_vivo	in_vivo			432	A	A	A	432	432			432	432	91.87	76.65	46.25			1752	1.752	Herrel et al. 2002	1		0	0
34	Platemys_platycephala	Herrel et al. 2002	Platemys_platycephala				Reptiles	Reptiles	Reptiles	in_vivo	in_vivo			7	A	A	A	7	7			7	7	32.33	21.78	12.4			245	0.245	Herrel et al. 2002	1		0	0
35	Platysternon_megacephalum	Herrel et al. 2002	Platysternon_megacephalum				Reptiles	Reptiles	Reptiles	in_vivo	in_vivo			42	A	A	A	42	42			42	42	34.41	29.54	21.02			137	0.137	Herrel et al. 2002	1		1	1
36	Staurotypus_salvinii	Herrel et al. 2002	Staurotypus_salvinii				Reptiles	Reptiles	Reptiles	in_vivo	in_vivo			252	A	A	A	252	252			252	252	64.32	44.15	33.14			743	0.743	Herrel et al. 2002	1		0	0
37	Staurotypus_triporcatus	Herrel et al. 2002	Staurotypus_triporcatus				Reptiles	Reptiles	Reptiles	in_vivo	in_vivo			139	A	A	A	139	139			139	139	48.43	30.87	22.73			600	0.6	Herrel et al. 2002	1		1	1
38	Sternotherus_carinatus	Herrel et al. 2002	Sternotherus_carinatus				Reptiles	Reptiles	Reptiles	in_vivo	in_vivo			109	A	A	A	109	109			109	109	40.96	28.79	23.24			276	0.276	Herrel et al. 2002	1		0	0
39	Sternotherus_odoratus	Herrel et al. 2002	Sternotherus_odoratus				Reptiles	Reptiles	Reptiles	in_vivo	in_vivo			31	A	A	A	31	31			31	31	29.44	20.17	15.71			321	0.321	Herrel et al. 2002	1		1	1
40	Terrapene_carolina	Herrel et al. 2002	Terrapene_carolina				Reptiles	Reptiles	Reptiles	in_vivo	in_vivo			25	A	A	A	25	25			25	25	25.76	18.97	16.69			361	0.361	Herrel et al. 2002	1		1	1
41	Testudo_horsfieldii	Herrel et al. 2002	Testudo_horsfieldii				Reptiles	Reptiles	Reptiles	in_vivo	in_vivo			18	A	A	A	18	18			18	18	19.89	20.19	17.41			373	0.373	Herrel et al. 2002	1		1	1
42	Trachemys_scripta	Herrel et al. 2002	Trachemys_scripta				Reptiles	Reptiles	Reptiles	in_vivo	in_vivo			15	A	A	A	15	15			15	15	25.2	16.43	13.11			235	0.235	Herrel et al. 2002	1		1	1
43	Amadina_erythrocephala	van der Meijj and Bout 2004	Amadina_erythrocephala				Dinosaurs	Birds	Finches	in_vivo	in_vivo			4	A	A	A	4	4			4	4	26.9	14.45	11.875			23	0.023	van der Meijj and Bout 2004	1		1	1
44	Amadina_fasciata	van der Meijj and Bout 2004	Amadina_fasciata				Dinosaurs	Birds	Finches	in_vivo	in_vivo			5	A	A	A	5	5			5	5	23.6333	14.9167	10.95			19	0.019	van der Meijj and Bout 2004	1		1	1
45	Carduelis_chloris	van der Meijj and Bout 2004	Carduelis_chloris				Dinosaurs	Birds	Finches	in_vivo	in_vivo			14	A	A	A	14	14			14	14	31.85	16.3	13.2			28	0.028	van der Meijj and Bout 2004	1		1	1
46	Carduelis_flammea	van der Meijj and Bout 2004	Carduelis_flammea				Dinosaurs	Birds	Finches	in_vivo	in_vivo			3	A	A	A	3	3			3	3						13	0.013	van der Meijj and Bout 2004	1		1	1
47	Carduelis_sinica	van der Meijj and Bout 2004	Carduelis_sinica				Dinosaurs	Birds	Finches	in_vivo	in_vivo			8	A	A	A	8	8			8	8	26.75	13.575	11.725			20	0.02	van der Meijj and Bout 2004	1		1	1
48	Carduelis_spinus	van der Meijj and Bout 2004	Carduelis_spinus				Dinosaurs	Birds	Finches	in_vivo	in_vivo			3	A	A	A	3	3			3	3	25.7875	12.7375	10.575			13	0.013	van der Meijj and Bout 2004	1		1	1
49	Carpodacus_erythrinus	van der Meijj and Bout 2004	Carpodacus_erythrinus				Dinosaurs	Birds	Finches	in_vivo	in_vivo			6	A	A	A	6	6			6	6	25.4	14.4667	12.7333			22	0.022	van der Meijj and Bout 2004	1		1	1
50	Erythrura_gouldiae	van der Meijj and Bout 2004	Chloebia_gouldia		Erythrura_gouldiae		Dinosaurs	Birds	Finches	in_vivo	in_vivo			4	A	A	A	4	4			4	4	23.65	12.65	10.9			15	0.015	van der Meijj and Bout 2004	1		1	1
51	Eophona_migratoria	van der Meijj and Bout 2004	Eophona_migratoria				Dinosaurs	Birds	Finches	in_vivo	in_vivo			36	A	A	A	36	36			36	36						52	0.052	van der Meijj and Bout 2004	1		1	1
52	Erythrura_trichroa	van der Meijj and Bout 2004	Erythrura_trichroa				Dinosaurs	Birds	Finches	in_vivo	in_vivo			5	A	A	A	5	5			5	5						13	0.013	van der Meijj and Bout 2004	1		1	1
53	Estrilda_troglodytes	van der Meijj and Bout 2004	Estrilda_troglodytes				Dinosaurs	Birds	Finches	in_vivo	in_vivo			1	A	A	A	1	1			1	1	20.05	11.2	9.35			7	0.007	van der Meijj and Bout 2004	1		1	1
54	Hypargos_niveoguttatus	van der Meijj and Bout 2004	Hypargos_niveoguttatus				Dinosaurs	Birds	Finches	in_vivo	in_vivo			3	A	A	A	3	3			3	3	24.9	13.35	11.7			16	0.016	van der Meijj and Bout 2004	1		1	1
55	Lagonosticta_senegala	van der Meijj and Bout 2004	Lagonosticta_senegala				Dinosaurs	Birds	Finches	in_vivo	in_vivo			1	A	A	A	1	1			1	1	21.6	11.3	9.4			7	0.007	van der Meijj and Bout 2004	1		1	1
56	Lonchura_fringilloides	van der Meijj and Bout 2004	Lonchura_fringilloides				Dinosaurs	Birds	Finches	in_vivo	in_vivo			5	A	A	A	5	5			5	5	27.5	13.1	11.3			16	0.016	van der Meijj and Bout 2004	1		1	1
57	Lonchura_pallida	van der Meijj and Bout 2004	Lonchura_pallida				Dinosaurs	Birds	Finches	in_vivo	in_vivo			3	A	A	A	3	3			3	3						13	0.013	van der Meijj and Bout 2004	1		1	1
58	Lonchura_punctulata	van der Meijj and Bout 2004	Lonchura_punctulata				Dinosaurs	Birds	Finches	in_vivo	in_vivo			4	A	A	A	4	4			4	4	23.3	12.75	10.4			12	0.012	van der Meijj and Bout 2004	1		1	1
59	Mycerobas_affinis	van der Meijj and Bout 2004	Mycerobas_affinis				Dinosaurs	Birds	Finches	in_vivo	in_vivo			38	A	A	A	38	38			38	38						70	0.07	van der Meijj and Bout 2004	1		1	1
60	Neochmia_modesta	van der Meijj and Bout 2004	Neochima_modesta		Neochmia_modesta		Dinosaurs	Birds	Finches	in_vivo	in_vivo			2	A	A	A	2	2			2	2						13	0.013	van der Meijj and Bout 2004	1		1	1
61	Neochmia_ruficauda	van der Meijj and Bout 2004	Neochima_ruficauda		Neochmia_ruficauda		Dinosaurs	Birds	Finches	in_vivo	in_vivo			2	A	A	A	2	2			2	2	21.4	12.05	10.1			12	0.012	van der Meijj and Bout 2004	1		1	1
62	Padda_oryzivora	van der Meijj and Bout 2004	Padda_oryzivora				Dinosaurs	Birds	Finches	in_vivo	in_vivo			10	A	A	A	10	10			10	10	28.7333	14.4333	12.1667			30	0.03	van der Meijj and Bout 2004	1		1	1
63	Poephila_acuticauda	van der Meijj and Bout 2004	Phoephila_acuticauda		Poephila_acuticauda		Dinosaurs	Birds	Finches	in_vivo	in_vivo			3	A	A	A	3	3			3	3	22.8	13.05	10.4			8	0.008	van der Meijj and Bout 2004	1		1	1
64	Poephila_cincta	van der Meijj and Bout 2004	Poephila_cincta				Dinosaurs	Birds	Finches	in_vivo	in_vivo			3	A	A	A	3	3			3	3	23.2	12.7	10.1			16	0.016	van der Meijj and Bout 2004	1		1	1
65	Pyrrhula_pyrrhula	van der Meijj and Bout 2004	Pyrrhula_pyrrhula				Dinosaurs	Birds	Finches	in_vivo	in_vivo			5	A	A	A	5	5			5	5	26.2667	16.3667	12.3333			21	0.021	van der Meijj and Bout 2004	1		1	1
66	Pytilia_hypogrammica	van der Meijj and Bout 2004	Pytilia_hypogrammica				Dinosaurs	Birds	Finches	in_vivo	in_vivo			3	A	A	A	3	3			3	3						15	0.015	van der Meijj and Bout 2004	1		1	1
67	Rhodospiza_obsoleta	van der Meijj and Bout 2004	Rhodopechys_obsoleta		Rhodospiza_obsoleta		Dinosaurs	Birds	Finches	in_vivo	in_vivo			6	A	A	A	6	6			6	6						23	0.023	van der Meijj and Bout 2004	1		1	1
68	Serinus_leucopygius	van der Meijj and Bout 2004	Serinus_leucopygius				Dinosaurs	Birds	Finches	in_vivo	in_vivo			2	A	A	A	2	2			2	2	20.4	12	10.2			10	0.01	van der Meijj and Bout 2004	1		1	1
69	Serinus_mozambicus	van der Meijj and Bout 2004	Serinus_mozambicus				Dinosaurs	Birds	Finches	in_vivo	in_vivo			3	A	A	A	3	3			3	3	21.0333	12.2333	10.1667			12	0.012	van der Meijj and Bout 2004	1		1	1
70	Serinus_sulphuratus	van der Meijj and Bout 2004	Serinus_sulphuratus				Dinosaurs	Birds	Finches	in_vivo	in_vivo			12	A	A	A	12	12			12	12						18	0.018	van der Meijj and Bout 2004	1		1	1
71	Taeniopygia_bichenovii	van der Meijj and Bout 2004	Taeniopygia_bichenovi		Taeniopygia_bichenovii		Dinosaurs	Birds	Finches	in_vivo	in_vivo			2	A	A	A	2	2			2	2						10	0.01	van der Meijj and Bout 2004	1		1	1
72	Taeniopygia_guttata	van der Meijj and Bout 2004	Taenopygia_guttata		Taeniopygia_guttata		Dinosaurs	Birds	Finches	in_vivo	in_vivo			4	A	A	A	4	4			4	4						23	0.023	van der Meijj and Bout 2004	1		1	1
73	Uraeginthus_bengalus	van der Meijj and Bout 2004	Uraeginthus_bengalus				Dinosaurs	Birds	Finches	in_vivo	in_vivo			1	A	A	A	1	1			1	1	23	12.1	10.2			10	0.01	van der Meijj and Bout 2004	1		1	1
74	Vulpes_lagopus	Christiansen and Wroe2007	Vulpes_lagopus				Mammals	Mammals	Mammals	dry_skull	estimate	276		164.6	P	A	P	276	164.6			276	164.6						4800	4.8	Christiansen and Wroe2007	1		1	0
75	Atelocynus_microtis	Christiansen and Wroe2007	Atelocynus_microtis				Mammals	Mammals	Mammals	dry_skull	estimate	591		395	P	A	P	591	395			591	395						10200	10.2	Christiansen and Wroe2007	1		1	1
76	Canis_adustus	Christiansen and Wroe2007	Canis_adustus				Mammals	Mammals	Mammals	dry_skull	estimate	466.4		284.2	P	A	P	466.4	284.2			466.4	284.2						9500	9.5	Christiansen and Wroe2007	1		1	1
77	Canis_aureus	Christiansen and Wroe2007	Canis_aureus				Mammals	Mammals	Mammals	dry_skull	estimate	435.8		276.4	P	A	P	435.8	276.4			435.8	276.4						9100	9.1	Christiansen and Wroe2007	1		1	1
78	Canis_familiaris	Christiansen and Wroe2007	Canis_familiaris				Mammals	Mammals	Mammals	dry_skull	estimate	1099.6		703	P	A	P	1099.6	703			1099.6	703						25000	25	Christiansen and Wroe2007	1		0	0
79	Canis_latrans	Christiansen and Wroe2007	Canis_latrans				Mammals	Mammals	Mammals	dry_skull	estimate	579.2		346.8	P	A	P	579.2	346.8			579.2	346.8						10700	10.7	Christiansen and Wroe2007	1		1	0
80	Canis_lupus	Christiansen and Wroe2007	Canis_lupus				Mammals	Mammals	Mammals	dry_skull	estimate	1547.8		987	P	A	P	1547.8	987			1547.8	987						35500	35.5	Christiansen and Wroe2007	1		1	1
81	Canis_mesomelas	Christiansen and Wroe2007	Canis_mesomelas				Mammals	Mammals	Mammals	dry_skull	estimate	375		235.6	P	A	P	375	235.6			375	235.6						8500	8.5	Christiansen and Wroe2007	1		1	1
82	Cerdocyon_thous	Christiansen and Wroe2007	Cerdocyon_thous				Mammals	Mammals	Mammals	dry_skull	estimate	356.4		229.2	P	A	P	356.4	229.2			356.4	229.2						6800	6.8	Christiansen and Wroe2007	1		1	1
83	Chrysocyon_brachyurus	Christiansen and Wroe2007	Chrysocyon_brachyurus				Mammals	Mammals	Mammals	dry_skull	estimate	1021.6		646	P	A	P	1021.6	646			1021.6	646						23400	23.4	Christiansen and Wroe2007	1		1	1
84	Cuon_alpinus	Christiansen and Wroe2007	Cuon_alpinus				Mammals	Mammals	Mammals	dry_skull	estimate	795.8		523	P	A	P	795.8	523			795.8	523						12900	12.9	Christiansen and Wroe2007	1		1	1
85	Vulpes_zerda	Christiansen and Wroe2007	Fennecus_zerda		Vulpes_zerda		Mammals	Mammals	Mammals	dry_skull	estimate	129.6		78	P	A	P	129.6	78			129.6	78						1000	1	Christiansen and Wroe2007	1		1	1
86	Lycalopex_vetulus	Christiansen and Wroe2007	Lycalopex_vetulus				Mammals	Mammals	Mammals	dry_skull	estimate	267		170.6	P	A	P	267	170.6			267	170.6						4100	4.1	Christiansen and Wroe2007	1		1	1
87	Lycaon_pictus	Christiansen and Wroe2007	Lycaon_pictus				Mammals	Mammals	Mammals	dry_skull	estimate	1113.6		749.2	P	A	P	1113.6	749.2			1113.6	749.2						22400	22.4	Christiansen and Wroe2007	1		1	1
88	Nyctereutes_procyonoides	Christiansen and Wroe2007	Nyctereutes_procyonoides				Mammals	Mammals	Mammals	dry_skull	estimate	291.8		196	P	A	P	291.8	196			291.8	196						5100	5.1	Christiansen and Wroe2007	1		1	1
89	Otocyon_megalotis	Christiansen and Wroe2007	Otocyon_megalotis				Mammals	Mammals	Mammals	dry_skull	estimate	222.6		152.4	P	A	P	222.6	152.4			222.6	152.4						5200	5.2	Christiansen and Wroe2007	1		1	1
90	Lycalopex_culpaeus	Christiansen and Wroe2007	Pseudalopex_culpaeus		Lycalopex_culpaeus		Mammals	Mammals	Mammals	dry_skull	estimate	517		316.8	P	A	P	517	316.8			517	316.8						11500	11.5	Christiansen and Wroe2007	1		1	1
91	Lycalopex_griseus	Christiansen and Wroe2007	Pseudalopex_griseus		Lycalopex_griseus		Mammals	Mammals	Mammals	dry_skull	estimate	446.8		262	P	A	P	446.8	262			446.8	262						5900	5.9	Christiansen and Wroe2007	1		1	1
92	Lycalopex_gymnocercus	Christiansen and Wroe2007	Pseudalopex_gymnocerus		Lycalopex_gymnocercus		Mammals	Mammals	Mammals	dry_skull	estimate	355		222.8	P	A	P	355	222.8			355	222.8						5600	5.6	Christiansen and Wroe2007	1		1	1
93	Speothos_venaticus	Christiansen and Wroe2007	Speothos_venaticus				Mammals	Mammals	Mammals	dry_skull	estimate	467		300	P	A	P	467	300			467	300						6000	6	Christiansen and Wroe2007	1		1	1
94	Urocyon_cinereoargenteus	Christiansen and Wroe2007	Urocyon_cineroargenteus		Urocyon_cinereoargenteus		Mammals	Mammals	Mammals	dry_skull	estimate	268.2		171.6	P	A	P	268.2	171.6			268.2	171.6						4800	4.8	Christiansen and Wroe2007	1		1	1
95	Vulpes_bengalensis	Christiansen and Wroe2007	Vulpes_bengalensis				Mammals	Mammals	Mammals	dry_skull	estimate	255.2		151.6	P	A	P	255.2	151.6			255.2	151.6						3800	3.8	Christiansen and Wroe2007	1		0	0
96	Vulpes_chama	Christiansen and Wroe2007	Vulpes_chama				Mammals	Mammals	Mammals	dry_skull	estimate	268		156.8	P	A	P	268	156.8			268	156.8						4300	4.3	Christiansen and Wroe2007	1		1	1
97	Vulpes_ferrilata	Christiansen and Wroe2007	Vulpes_ferrilata				Mammals	Mammals	Mammals	dry_skull	estimate	429		226.6	P	A	P	429	226.6			429	226.6						4900	4.9	Christiansen and Wroe2007	1		1	1
98	Vulpes_pallida	Christiansen and Wroe2007	Vulpes_pallida				Mammals	Mammals	Mammals	dry_skull	estimate	189.8		120.6	P	A	P	189.8	120.6			189.8	120.6						3000	3	Christiansen and Wroe2007	1		0	0
99	Vulpes_rueppellii	Christiansen and Wroe2007	Vulpes_rueppellii				Mammals	Mammals	Mammals	dry_skull	estimate	199.2		114.8	P	A	P	199.2	114.8			199.2	114.8						2500	2.5	Christiansen and Wroe2007	1		1	1
100	Vulpes_velox	Christiansen and Wroe2007	Vulpes_velox				Mammals	Mammals	Mammals	dry_skull	estimate	283		157	P	A	P	283	157			283	157						3400	3.4	Christiansen and Wroe2007	1		1	1
101	Vulpes_vulpes	Christiansen and Wroe2007	Vulpes_vulpes				Mammals	Mammals	Mammals	dry_skull	estimate	478		288	P	A	P	478	288			478	288						7900	7.9	Christiansen and Wroe2007	1		1	1
102	Acinonyx_jubatus	Christiansen and Wroe2007	Acinonyx_jubatus				Mammals	Mammals	Mammals	dry_skull	estimate	1018.2		677.6	P	A	P	1018.2	677.6			1018.2	677.6						46800	46.8	Christiansen and Wroe2007	1		1	1
103	Caracal_caracal	Christiansen and Wroe2007	Caracal_caracal				Mammals	Mammals	Mammals	dry_skull	estimate	502.8		337	P	A	P	502.8	337			502.8	337						11500	11.5	Christiansen and Wroe2007	1		1	0
104	Pardofelis_temminckii	Christiansen and Wroe2007	Pardofelis_temminckii				Mammals	Mammals	Mammals	dry_skull	estimate	618		388.4	P	A	P	618	388.4			618	388.4						12600	12.6	Christiansen and Wroe2007	1		1	1
105	Felis_catus	Christiansen and Wroe2007	Felis_catus				Mammals	Mammals	Mammals	dry_skull	estimate	236.2		146.6	P	A	P	236.2	146.6			236.2	146.6						3700	3.7	Christiansen and Wroe2007	1		1	1
106	Felis_chaus	Christiansen and Wroe2007	Felis_chaus				Mammals	Mammals	Mammals	dry_skull	estimate	363.4		224.4	P	A	P	363.4	224.4			363.4	224.4						6800	6.8	Christiansen and Wroe2007	1		1	0
107	Felis_margarita	Christiansen and Wroe2007	Felis_margarita				Mammals	Mammals	Mammals	dry_skull	estimate	310.8		204	P	A	P	310.8	204			310.8	204						3000	3	Christiansen and Wroe2007	1		1	1
108	Felis_nigripes	Christiansen and Wroe2007	Felis_nigripes				Mammals	Mammals	Mammals	dry_skull	estimate	185.8		108.6	P	A	P	185.8	108.6			185.8	108.6						1900	1.9	Christiansen and Wroe2007	1		1	0
109	Felis_silvestris	Christiansen and Wroe2007	Felis_silvestris				Mammals	Mammals	Mammals	dry_skull	estimate	305.2		196.8	P	A	P	305.2	196.8			305.2	196.8						4800	4.8	Christiansen and Wroe2007	1		1	1
110	Puma_yagouaroundi	Christiansen and Wroe2007	Puma_yagouaroundi				Mammals	Mammals	Mammals	dry_skull	estimate	259.4		175	P	A	P	259.4	175			259.4	175						5200	5.2	Christiansen and Wroe2007	1		1	0
111	Leopardus_pardalis	Christiansen and Wroe2007	Leopardus_pardalis				Mammals	Mammals	Mammals	dry_skull	estimate	612		399	P	A	P	612	399			612	399						10700	10.7	Christiansen and Wroe2007	1		1	0
112	Leopardus_tigrinus	Christiansen and Wroe2007	Leopardus_tigrinus				Mammals	Mammals	Mammals	dry_skull	estimate	194.4		126	P	A	P	194.4	126			194.4	126						3500	3.5	Christiansen and Wroe2007	1		1	1
113	Leopardus_wiedii	Christiansen and Wroe2007	Leopardus_wiedii				Mammals	Mammals	Mammals	dry_skull	estimate	202.8		126.8	P	A	P	202.8	126.8			202.8	126.8						3500	3.5	Christiansen and Wroe2007	1		1	0
114	Leptailurus_serval	Christiansen and Wroe2007	Leptailurus_serval				Mammals	Mammals	Mammals	dry_skull	estimate	526.6		331.2	P	A	P	526.6	331.2			526.6	331.2						10200	10.2	Christiansen and Wroe2007	1		1	0
115	Lynx_canadensis	Christiansen and Wroe2007	Lynx_canadensis				Mammals	Mammals	Mammals	dry_skull	estimate	450.6		279.2	P	A	P	450.6	279.2			450.6	279.2						9800	9.8	Christiansen and Wroe2007	1		1	0
116	Lynx_lynx	Christiansen and Wroe2007	Lynx_lynx				Mammals	Mammals	Mammals	dry_skull	estimate	620.4		403.2	P	A	P	620.4	403.2			620.4	403.2						17000	17	Christiansen and Wroe2007	1		1	0
117	Lynx_rufus	Christiansen and Wroe2007	Lynx_rufus				Mammals	Mammals	Mammals	dry_skull	estimate	578.2		369	P	A	P	578.2	369			578.2	369						10500	10.5	Christiansen and Wroe2007	1		1	0
118	Neofelis_nebulosa	Christiansen and Wroe2007	Neofelis_nebulosa				Mammals	Mammals	Mammals	dry_skull	estimate	1088.6		668.4	P	A	P	1088.6	668.4			1088.6	668.4						20900	20.9	Christiansen and Wroe2007	1		1	0
119	Leopardus_colocolo	Christiansen and Wroe2007	Leopardus_colocolo				Mammals	Mammals	Mammals	dry_skull	estimate	393.8		248.4	P	A	P	393.8	248.4			393.8	248.4						4100	4.1	Christiansen and Wroe2007	1		1	1
120	Leopardus_geoffroyi	Christiansen and Wroe2007	Leopardus_geoffroyi				Mammals	Mammals	Mammals	dry_skull	estimate	338.8		221.8	P	A	P	338.8	221.8			338.8	221.8						4900	4.9	Christiansen and Wroe2007	1		1	1
121	Leopardus_guigna	Christiansen and Wroe2007	Leopardus_guigna				Mammals	Mammals	Mammals	dry_skull	estimate	229.2		145.2	P	A	P	229.2	145.2			229.2	145.2						2200	2.2	Christiansen and Wroe2007	1		1	1
122	Otocolobus_manul	Christiansen and Wroe2007	Otocolobus_manul				Mammals	Mammals	Mammals	dry_skull	estimate	310.8		188.8	P	A	P	310.8	188.8			310.8	188.8						3500	3.5	Christiansen and Wroe2007	1		1	1
123	Panthera_leo	Christiansen and Wroe2007	Panthera_leo				Mammals	Mammals	Mammals	dry_skull	estimate	4047.4		2629.4	P	A	P	4047.4	2629.4			4047.4	2629.4						162200	162.2	Christiansen and Wroe2007	1		1	1
124	Panthera_onca	Christiansen and Wroe2007	Panthera_onca				Mammals	Mammals	Mammals	dry_skull	estimate	2722.4		1774	P	A	P	2722.4	1774			2722.4	1774						95500	95.5	Christiansen and Wroe2007	1		1	0
125	Panthera_pardus	Christiansen and Wroe2007	Panthera_pardus				Mammals	Mammals	Mammals	dry_skull	estimate	1928.8		1242.2	P	A	P	1928.8	1242.2			1928.8	1242.2						55000	55	Christiansen and Wroe2007	1		1	0
126	Panthera_tigris	Christiansen and Wroe2007	Panthera_tigris				Mammals	Mammals	Mammals	dry_skull	estimate	4329.4		2944.2	P	A	P	4329.4	2944.2			4329.4	2944.2						177800	177.8	Christiansen and Wroe2007	1		1	0
127	Panthera_uncia	Christiansen and Wroe2007	Panthera_uncia				Mammals	Mammals	Mammals	dry_skull	estimate	1207		775.2	P	A	P	1207	775.2			1207	775.2						35500	35.5	Christiansen and Wroe2007	1		1	0
128	Pardofelis_marmorata	Christiansen and Wroe2007	Pardofelis_marmorata				Mammals	Mammals	Mammals	dry_skull	estimate	370.6		234.4	P	A	P	370.6	234.4			370.6	234.4						4500	4.5	Christiansen and Wroe2007	1		1	1
129	Prionailurus_bengalensis	Christiansen and Wroe2007	Prionailurus_bengalensis				Mammals	Mammals	Mammals	dry_skull	estimate	188.8		122.4	P	A	P	188.8	122.4			188.8	122.4						3100	3.1	Christiansen and Wroe2007	1		1	0
130	Prionailurus_planiceps	Christiansen and Wroe2007	Prionailurus_planiceps				Mammals	Mammals	Mammals	dry_skull	estimate	290.2		174.6	P	A	P	290.2	174.6			290.2	174.6						3000	3	Christiansen and Wroe2007	1		1	1
131	Prionailurus_rubiginosus	Christiansen and Wroe2007	Prionailurus_rubiginosus				Mammals	Mammals	Mammals	dry_skull	estimate	217.2		136.4	P	A	P	217.2	136.4			217.2	136.4						2200	2.2	Christiansen and Wroe2007	1		1	1
132	Prionailurus_viverrinus	Christiansen and Wroe2007	Prionailurus_viverrinus				Mammals	Mammals	Mammals	dry_skull	estimate	511.2		332	P	A	P	511.2	332			511.2	332						8300	8.3	Christiansen and Wroe2007	1		1	0
133	Caracal_aurata	Christiansen and Wroe2007	Caracal_aurata				Mammals	Mammals	Mammals	dry_skull	estimate	673.2		432.4	P	A	P	673.2	432.4			673.2	432.4						11000	11	Christiansen and Wroe2007	1		1	1
134	Puma_concolor	Christiansen and Wroe2007	Puma_concolor				Mammals	Mammals	Mammals	dry_skull	estimate	1546.4		994.2	P	A	P	1546.4	994.2			1546.4	994.2						39800	39.8	Christiansen and Wroe2007	1		1	0
135	Bdeogale_crassicauda	Christiansen and Wroe2007	Bdeogale_crassicauda				Mammals	Mammals	Mammals	dry_skull	estimate	180.4		112.4	P	A	P	180.4	112.4			180.4	112.4						2800	2.8	Christiansen and Wroe2007	1		1	1
136	Crossarchus_platycephalus	Christiansen and Wroe2007	Crossarchus_platycephalus				Mammals	Mammals	Mammals	dry_skull	estimate	126		78.8	P	A	P	126	78.8			126	78.8						1400	1.4	Christiansen and Wroe2007	1		1	1
137	Cynictis_penicillata	Christiansen and Wroe2007	Cynictis_penicillata				Mammals	Mammals	Mammals	dry_skull	estimate	113.2		67.4	P	A	P	113.2	67.4			113.2	67.4						900	0.9	Christiansen and Wroe2007	1		1	1
138	Galidia_elegans	Christiansen and Wroe2007	Galidia_elegans				Mammals	Mammals	Mammals	dry_skull	estimate	116.8		71	P	A	P	116.8	71			116.8	71						1000	1	Christiansen and Wroe2007	1		1	1
139	Herpestes_auropunctatus	Christiansen and Wroe2007	Herpestes_auropunctatus				Mammals	Mammals	Mammals	dry_skull	estimate	93.6		67.4	P	A	P	93.6	67.4			93.6	67.4						1100	1.1	Christiansen and Wroe2007	1		1	1
140	Herpestes_edwardsii	Christiansen and Wroe2007	Herpestes_edwarsi		Herpestes_edwardsii		Mammals	Mammals	Mammals	dry_skull	estimate	150.4		92.4	P	A	P	150.4	92.4			150.4	92.4						1600	1.6	Christiansen and Wroe2007	1		1	1
141	Herpestes_fuscus	Christiansen and Wroe2007	Herpestes_fitscus		Herpestes_fuscus		Mammals	Mammals	Mammals	dry_skull	estimate	161.8		99.4	P	A	P	161.8	99.4			161.8	99.4						1700	1.7	Christiansen and Wroe2007	1		1	1
142	Herpestes_ichneumon	Christiansen and Wroe2007	Herpestes_ichneumon				Mammals	Mammals	Mammals	dry_skull	estimate	297		181.2	P	A	P	297	181.2			297	181.2						3100	3.1	Christiansen and Wroe2007	1		1	1
143	Galerella_pulverulenta	Christiansen and Wroe2007	Herpestes_pulverulentus		Galerella_pulverulenta		Mammals	Mammals	Mammals	dry_skull	estimate	108.6		63	P	A	P	108.6	63			108.6	63						1700	1.7	Christiansen and Wroe2007	1		1	1
144	Ichneumia_albicauda	Christiansen and Wroe2007	Ichneumia_albicauda				Mammals	Mammals	Mammals	dry_skull	estimate	209.4		131.6	P	A	P	209.4	131.6			209.4	131.6						3900	3.9	Christiansen and Wroe2007	1		1	1
145	Mungos_mungo	Christiansen and Wroe2007	Mungos_mungo				Mammals	Mammals	Mammals	dry_skull	estimate	107.4		68	P	A	P	107.4	68			107.4	68						1900	1.9	Christiansen and Wroe2007	1		1	1
146	Rhynchogale_melleri	Christiansen and Wroe2007	Rhynchogale_melleri				Mammals	Mammals	Mammals	dry_skull	estimate	172		111.4	P	A	P	172	111.4			172	111.4						2500	2.5	Christiansen and Wroe2007	1		1	1
147	Salanoia_concolor	Christiansen and Wroe2007	Salanoia_concolor				Mammals	Mammals	Mammals	dry_skull	estimate	104.8		63.6	P	A	P	104.8	63.6			104.8	63.6						1000	1	Christiansen and Wroe2007	1		1	1
148	Crocuta_crocuta	Christiansen and Wroe2007	Crocuta_crocuta				Mammals	Mammals	Mammals	dry_skull	estimate	1971		1131.4	P	A	P	1971	1131.4			1971	1131.4						63100	63.1	Christiansen and Wroe2007	1		1	0
149	Parahyaena_brunnea	Christiansen and Wroe2007	Hyaena_brunnea		Parahyaena_brunnea		Mammals	Mammals	Mammals	dry_skull	estimate	2059.2		1120.2	P	A	P	2059.2	1120.2			2059.2	1120.2	227	169				38900	38.9	Christiansen and Wroe2007	1		1	1
150	Hyaena_hyaena	Christiansen and Wroe2007	Hyaena_hyaena				Mammals	Mammals	Mammals	dry_skull	estimate	1778.4		1015.6	P	A	P	1778.4	1015.6			1778.4	1015.6	199.8	151.8				36300	36.3	Christiansen and Wroe2007	1		1	1
151	Proteles_cristatus	Christiansen and Wroe2007	Proteles_cristata		Proteles_cristatus		Mammals	Mammals	Mammals	dry_skull	estimate			244.4	A	A	A	244.4	244.4			244.4	244.4						13200	13.2	Christiansen and Wroe2007	1		1	0
152	Aonyx_capensis	Christiansen and Wroe2007	Aonyx_capensis				Mammals	Mammals	Mammals	dry_skull	estimate	696		476.6	P	A	P	696	476.6			696	476.6						14100	14.1	Christiansen and Wroe2007	1		1	1
153	Aonyx_cinerea	Christiansen and Wroe2007	Aonyx_cinerea				Mammals	Mammals	Mammals	dry_skull	estimate	226.6		142.4	P	A	P	226.6	142.4			226.6	142.4						3100	3.1	Christiansen and Wroe2007	1		1	1
154	Conepatus_humboldti	Christiansen and Wroe2007	Conepatus_humboldti				Mammals	Mammals	Mammals	dry_skull	estimate	152.2		105.4	P	A	P	152.2	105.4			152.2	105.4						3200	3.2	Christiansen and Wroe2007	1		0	0
155	Conepatus_semistriatus	Christiansen and Wroe2007	Conepatus_semistriatus				Mammals	Mammals	Mammals	dry_skull	estimate	160.4		120.6	P	A	P	160.4	120.6			160.4	120.6						3600	3.6	Christiansen and Wroe2007	1		1	1
156	Eira_barbara	Christiansen and Wroe2007	Eira_barbara				Mammals	Mammals	Mammals	dry_skull	estimate	486.8		338.6	P	A	P	486.8	338.6			486.8	338.6						5200	5.2	Christiansen and Wroe2007	1		1	1
157	Enhydra_lutris	Christiansen and Wroe2007	Enhydra_lutris				Mammals	Mammals	Mammals	dry_skull	estimate	788.4		562	P	A	P	788.4	562			788.4	562						34700	34.7	Christiansen and Wroe2007	1		1	1
158	Galictis_cuja	Christiansen and Wroe2007	Galictis_cuja				Mammals	Mammals	Mammals	dry_skull	estimate	171.6		116.4	P	A	P	171.6	116.4			171.6	116.4						1400	1.4	Christiansen and Wroe2007	1		1	1
159	Gulo_gulo	Christiansen and Wroe2007	Gulo_gulo				Mammals	Mammals	Mammals	dry_skull	estimate	697		447.2	P	A	P	697	447.2			697	447.2						14500	14.5	Christiansen and Wroe2007	1		1	1
160	Ictonyx_striatus	Christiansen and Wroe2007	Ictonyx_striatus				Mammals	Mammals	Mammals	dry_skull	estimate	144.4		95.2	P	A	P	144.4	95.2			144.4	95.2						1300	1.3	Christiansen and Wroe2007	1		1	1
161	Lontra_canadensis	Christiansen and Wroe2007	Lutra_canadensis		Lontra_canadensis		Mammals	Mammals	Mammals	dry_skull	estimate	439.4		288.6	P	A	P	439.4	288.6			439.4	288.6						7800	7.8	Christiansen and Wroe2007	1		1	1
162	Lontra_felina	Christiansen and Wroe2007	Lutra_felinct		Lontra_felina		Mammals	Mammals	Mammals	dry_skull	estimate	304		201.8	P	A	P	304	201.8			304	201.8						4200	4.2	Christiansen and Wroe2007	1		1	1
163	Lontra_longicaudis	Christiansen and Wroe2007	Lutra_longicaudis		Lontra_longicaudis		Mammals	Mammals	Mammals	dry_skull	estimate	379.6		258.2	P	A	P	379.6	258.2			379.6	258.2						7800	7.8	Christiansen and Wroe2007	1		1	1
164	Lutra_lutra	Christiansen and Wroe2007	Lutra_lutra				Mammals	Mammals	Mammals	dry_skull	estimate	432		295.6	P	A	P	432	295.6			432	295.6						8300	8.3	Christiansen and Wroe2007	1		1	1
165	Hydrictis_maculicollis	Christiansen and Wroe2007	Lutra_maculicollis		Hydrictis_maculicollis		Mammals	Mammals	Mammals	dry_skull	estimate	283.6		185	P	A	P	283.6	185			283.6	185						5200	5.2	Christiansen and Wroe2007	1		1	1
166	Lutrogale_perspicillata	Christiansen and Wroe2007	Lutra_perspicillata		Lutrogale_perspicillata		Mammals	Mammals	Mammals	dry_skull	estimate	613.6		405.2	P	A	P	613.6	405.2			613.6	405.2						9800	9.8	Christiansen and Wroe2007	1		1	1
167	Lutra_sumatrana	Christiansen and Wroe2007	Lutra_sumatrana				Mammals	Mammals	Mammals	dry_skull	estimate	303.2		198.4	P	A	P	303.2	198.4			303.2	198.4						5500	5.5	Christiansen and Wroe2007	1		1	1
168	Martes_americana	Christiansen and Wroe2007	Martes_americana				Mammals	Mammals	Mammals	dry_skull	estimate	140		84.8	P	A	P	140	84.8			140	84.8						1100	1.1	Christiansen and Wroe2007	1		1	1
169	Martes_flavigula	Christiansen and Wroe2007	Martes_flavigula				Mammals	Mammals	Mammals	dry_skull	estimate	243		156	P	A	P	243	156			243	156						2800	2.8	Christiansen and Wroe2007	1		1	1
170	Martes_foina	Christiansen and Wroe2007	Martes_foina				Mammals	Mammals	Mammals	dry_skull	estimate	197.8		124.6	P	A	P	197.8	124.6			197.8	124.6						2200	2.2	Christiansen and Wroe2007	1		1	1
171	Martes_martes	Christiansen and Wroe2007	Martes_martes				Mammals	Mammals	Mammals	dry_skull	estimate	233.2		146.4	P	A	P	233.2	146.4			233.2	146.4						2000	2	Christiansen and Wroe2007	1		1	1
172	Martes_pennanti	Christiansen and Wroe2007	Martes_pennanti				Mammals	Mammals	Mammals	dry_skull	estimate	368.6		226.2	P	A	P	368.6	226.2			368.6	226.2						4000	4	Christiansen and Wroe2007	1		1	1
173	Meles_meles	Christiansen and Wroe2007	Meles_meles				Mammals	Mammals	Mammals	dry_skull	estimate	564.4		414	P	A	P	564.4	414			564.4	414						13800	13.8	Christiansen and Wroe2007	1		1	1
174	Mellivora_capensis	Christiansen and Wroe2007	Mellivora_capensis				Mammals	Mammals	Mammals	dry_skull	estimate	635.4		433.8	P	A	P	635.4	433.8			635.4	433.8						11700	11.7	Christiansen and Wroe2007	1		1	1
175	Melogale_everetti	Christiansen and Wroe2007	Melogale_everetti				Mammals	Mammals	Mammals	dry_skull	estimate	142.8		95.6	P	A	P	142.8	95.6			142.8	95.6						2000	2	Christiansen and Wroe2007	1		0	0
176	Mephitis_macroura	Christiansen and Wroe2007	Mephitis_macrura		Mephitis_macroura		Mammals	Mammals	Mammals	dry_skull	estimate	123.8		88.6	P	A	P	123.8	88.6			123.8	88.6						1700	1.7	Christiansen and Wroe2007	1		1	1
177	Mephitis_mephitis	Christiansen and Wroe2007	Mephitis_mephitis				Mammals	Mammals	Mammals	dry_skull	estimate	199.8		146.6	P	A	P	199.8	146.6			199.8	146.6						2400	2.4	Christiansen and Wroe2007	1		1	1
178	Mustela_africana	Christiansen and Wroe2007	Mustela_africana				Mammals	Mammals	Mammals	dry_skull	estimate	42.2		28	P	A	P	42.2	28			42.2	28						300	0.3	Christiansen and Wroe2007	1		1	1
179	Mustela_altaica	Christiansen and Wroe2007	Mustela_altaica				Mammals	Mammals	Mammals	dry_skull	estimate	64.4		43	P	A	P	64.4	43			64.4	43						200	0.2	Christiansen and Wroe2007	1		1	1
180	Mustela_erminea	Christiansen and Wroe2007	Mustela_erminea				Mammals	Mammals	Mammals	dry_skull	estimate	60.8		39.8	P	A	P	60.8	39.8			60.8	39.8						200	0.2	Christiansen and Wroe2007	1		1	1
181	Mustela_frenata	Christiansen and Wroe2007	Mustela_frenata				Mammals	Mammals	Mammals	dry_skull	estimate	45.6		29	P	A	P	45.6	29			45.6	29						300	0.3	Christiansen and Wroe2007	1		1	1
182	Mustela_lutreola	Christiansen and Wroe2007	Mustela_lutreola				Mammals	Mammals	Mammals	dry_skull	estimate	92		56.4	P	A	P	92	56.4			92	56.4						600	0.6	Christiansen and Wroe2007	1		1	1
183	Mustela_nivalis	Christiansen and Wroe2007	Mustela_nivalis				Mammals	Mammals	Mammals	dry_skull	estimate	36.8		24	P	A	P	36.8	24			36.8	24						100	0.1	Christiansen and Wroe2007	1		1	1
184	Mustela_putorius	Christiansen and Wroe2007	Mustela_putorius				Mammals	Mammals	Mammals	dry_skull	estimate	176		120.8	P	A	P	176	120.8			176	120.8						1200	1.2	Christiansen and Wroe2007	1		1	1
185	Neovison_vison	Christiansen and Wroe2007	Neovison_vison				Mammals	Mammals	Mammals	dry_skull	estimate	117		74.8	P	A	P	117	74.8			117	74.8						1100	1.1	Christiansen and Wroe2007	1		1	1
186	Mydaus_javanensis	Christiansen and Wroe2007	Mydaus_javanensis				Mammals	Mammals	Mammals	dry_skull	estimate	116.4		82.6	P	A	P	116.4	82.6			116.4	82.6						3200	3.2	Christiansen and Wroe2007	1		1	1
187	Ictonyx_libyca	Christiansen and Wroe2007	Poecilictis_libyca		Ictonyx_libyca		Mammals	Mammals	Mammals	dry_skull	estimate	56.8		38	P	A	P	56.8	38			56.8	38						600	0.6	Christiansen and Wroe2007	1		1	1
188	Pteronura_brasiliensis	Christiansen and Wroe2007	Pteronura_brasiliensis				Mammals	Mammals	Mammals	dry_skull	estimate	1228.6		829.2	P	A	P	1228.6	829.2			1228.6	829.2						31600	31.6	Christiansen and Wroe2007	1		1	1
189	Taxidea_taxus	Christiansen and Wroe2007	Taxidea_taxus				Mammals	Mammals	Mammals	dry_skull	estimate	633.2		443.2	P	A	P	633.2	443.2			633.2	443.2						8700	8.7	Christiansen and Wroe2007	1		1	1
190	Ailurus_fulgens	Christiansen and Wroe2007	Ailurus_fulgens				Mammals	Mammals	Mammals	dry_skull	estimate	489.8		335.6	P	A	P	489.8	335.6			489.8	335.6						5200	5.2	Christiansen and Wroe2007	1		1	1
191	Bassaricyon_alleni	Christiansen and Wroe2007	Bassaricyon_alleni				Mammals	Mammals	Mammals	dry_skull	estimate	175		117.4	P	A	P	175	117.4			175	117.4						1300	1.3	Christiansen and Wroe2007	1		1	1
192	Bassaricyon_gabbii	Christiansen and Wroe2007	Bassaricyon_gabbii				Mammals	Mammals	Mammals	dry_skull	estimate	183.4		118.4	P	A	P	183.4	118.4			183.4	118.4						1000	1	Christiansen and Wroe2007	1		1	1
193	Bassariscus_astutus	Christiansen and Wroe2007	Bassariscus_astutus				Mammals	Mammals	Mammals	dry_skull	estimate	174.2		109.4	P	A	P	174.2	109.4			174.2	109.4						1700	1.7	Christiansen and Wroe2007	1		1	1
194	Bassariscus_sumichrasti	Christiansen and Wroe2007	Bassariscus_sumichrasti				Mammals	Mammals	Mammals	dry_skull	estimate	232.6		159.4	P	A	P	232.6	159.4			232.6	159.4						1900	1.9	Christiansen and Wroe2007	1		1	1
195	Nasua_nasua	Christiansen and Wroe2007	Nasua_nasua				Mammals	Mammals	Mammals	dry_skull	estimate	266.8		167.4	P	A	P	266.8	167.4			266.8	167.4						4400	4.4	Christiansen and Wroe2007	1		1	1
196	Nasuella_olivacea	Christiansen and Wroe2007	Nasuella_olivacea				Mammals	Mammals	Mammals	dry_skull	estimate	128.2		77.8	P	A	P	128.2	77.8			128.2	77.8						1900	1.9	Christiansen and Wroe2007	1		1	1
197	Potos_flavus	Christiansen and Wroe2007	Potos_flavus				Mammals	Mammals	Mammals	dry_skull	estimate	256.6		199.8	P	A	P	256.6	199.8			256.6	199.8						3300	3.3	Christiansen and Wroe2007	1		1	1
198	Procyon_cancrivorus	Christiansen and Wroe2007	Procyon_cancrivorus				Mammals	Mammals	Mammals	dry_skull	estimate	475.4		329.4	P	A	P	475.4	329.4			475.4	329.4						7800	7.8	Christiansen and Wroe2007	1		1	1
199	Procyon_lotor	Christiansen and Wroe2007	Procyon_lotor				Mammals	Mammals	Mammals	dry_skull	estimate	353.4		242.8	P	A	P	353.4	242.8			353.4	242.8						8900	8.9	Christiansen and Wroe2007	1		1	1
200	Ailuropoda_melanoleuca	Christiansen and Wroe2007	Ailuropoda_melanoleuca				Mammals	Mammals	Mammals	dry_skull	estimate	3631.8		2597.8	P	A	P	3631.8	2597.8			3631.8	2597.8						117500	117.5	Christiansen and Wroe2007	1		1	1
201	Tremarctos_ornatus	Christiansen and Wroe2007	Tremarctos_ornatus				Mammals	Mammals	Mammals	dry_skull	estimate	1893.2		1590.2	P	A	P	1893.2	1590.2			1893.2	1590.2						100000	100	Christiansen and Wroe2007	1		1	1
202	Ursus_americanus	Christiansen and Wroe2007	Ursus_americanus				Mammals	Mammals	Mammals	dry_skull	estimate	2007.2		1488.6	P	A	P	2007.2	1488.6			2007.2	1488.6						140000	140	Christiansen and Wroe2007	1		1	1
203	Ursus_arctos	Christiansen and Wroe2007	Ursus_arctos				Mammals	Mammals	Mammals	dry_skull	estimate	3789.8		2819.4	P	A	P	3789.8	2819.4			3789.8	2819.4						251200	251.2	Christiansen and Wroe2007	1		1	1
204	Helarctos_malayanus	Christiansen and Wroe2007	Ursus_malayanus		Helarctos_malayanus		Mammals	Mammals	Mammals	dry_skull	estimate	2379.2		1766.4	P	A	P	2379.2	1766.4			2379.2	1766.4						60100	60.1	Christiansen and Wroe2007	1		1	1
205	Ursus_maritimus	Christiansen and Wroe2007	Ursus_maritimus				Mammals	Mammals	Mammals	dry_skull	estimate	4699.2		3293.4	P	A	P	4699.2	3293.4			4699.2	3293.4						354800	354.8	Christiansen and Wroe2007	1		1	1
206	Ursus_thibetanus	Christiansen and Wroe2007	Ursus_thibetanus				Mammals	Mammals	Mammals	dry_skull	estimate	2271.4		1716.6	P	A	P	2271.4	1716.6			2271.4	1716.6						125900	125.9	Christiansen and Wroe2007	1		1	1
207	Melursus_ursinus	Christiansen and Wroe2007	Ursus_ursinus		Melursus_ursinus		Mammals	Mammals	Mammals	dry_skull	estimate	1424		1044.2	P	A	P	1424	1044.2			1424	1044.2						120200	120.2	Christiansen and Wroe2007	1		1	1
208	Arctictis_binturong	Christiansen and Wroe2007	Arctictis_binturong				Mammals	Mammals	Mammals	dry_skull	estimate	702.4		498.4	P	A	P	702.4	498.4			702.4	498.4						15800	15.8	Christiansen and Wroe2007	1		1	1
209	Arctogalidia_trivirgata	Christiansen and Wroe2007	Arctogalidia_trivirgata				Mammals	Mammals	Mammals	dry_skull	estimate	279.6		179.6	P	A	P	279.6	179.6			279.6	179.6						2400	2.4	Christiansen and Wroe2007	1		1	1
210	Civettictis_civetta	Christiansen and Wroe2007	Civettictis_civetta				Mammals	Mammals	Mammals	dry_skull	estimate	462.6		290.6	P	A	P	462.6	290.6			462.6	290.6						13500	13.5	Christiansen and Wroe2007	1		1	1
211	Cryptoprocta_ferox	Christiansen and Wroe2007	Cryptoprocta_ferox				Mammals	Mammals	Mammals	dry_skull	estimate	479.4		290	P	A	P	479.4	290			479.4	290						7800	7.8	Christiansen and Wroe2007	1		1	1
212	Cynogale_bennettii	Christiansen and Wroe2007	Cynogale_bennettii				Mammals	Mammals	Mammals	dry_skull	estimate	385.6		220.6	P	A	P	385.6	220.6			385.6	220.6						4600	4.6	Christiansen and Wroe2007	1		1	1
213	Eupleres_goudotii	Christiansen and Wroe2007	Eupleres_goudotti		Eupleres_goudotii		Mammals	Mammals	Mammals	dry_skull	estimate	100		57.2	P	A	P	100	57.2			100	57.2						3000	3	Christiansen and Wroe2007	1		1	1
214	Fossa_fossana	Christiansen and Wroe2007	Fossa_fossa		Fossa_fossana		Mammals	Mammals	Mammals	dry_skull	estimate	221.6		129.4	P	A	P	221.6	129.4			221.6	129.4						2200	2.2	Christiansen and Wroe2007	1		1	1
215	Genetta_genetta	Christiansen and Wroe2007	Genetta_genetta				Mammals	Mammals	Mammals	dry_skull	estimate	264.6		163.4	P	A	P	264.6	163.4			264.6	163.4						2800	2.8	Christiansen and Wroe2007	1		1	1
216	Macrogalidia_musschenbroekii	Christiansen and Wroe2007	Macrogalidia_musschenbroeki		Macrogalidia_musschenbroekii		Mammals	Mammals	Mammals	dry_skull	estimate	541		368.6	P	A	P	541	368.6			541	368.6						5600	5.6	Christiansen and Wroe2007	1		1	1
217	Nandinia_binotata	Christiansen and Wroe2007	Nandinia_binotata				Mammals	Mammals	Mammals	dry_skull	estimate	232.8		144.2	P	A	P	232.8	144.2			232.8	144.2						2600	2.6	Christiansen and Wroe2007	1		1	1
218	Paguma_larvata	Christiansen and Wroe2007	Paguma_larvata				Mammals	Mammals	Mammals	dry_skull	estimate	355.2		280.8	P	A	P	355.2	280.8			355.2	280.8						4500	4.5	Christiansen and Wroe2007	1		1	1
219	Paradoxurus_hermaphroditus	Christiansen and Wroe2007	Paradoxurus_hermaphroditus				Mammals	Mammals	Mammals	dry_skull	estimate	246.4		161.6	P	A	P	246.4	161.6			246.4	161.6						4500	4.5	Christiansen and Wroe2007	1		1	1
220	Prionodon_linsang	Christiansen and Wroe2007	Prionodon_linsang				Mammals	Mammals	Mammals	dry_skull	estimate	115.8		63.6	P	A	P	115.8	63.6			115.8	63.6						900	0.9	Christiansen and Wroe2007	1		1	1
221	Viverra_megaspila	Christiansen and Wroe2007	Viverra_megaspila				Mammals	Mammals	Mammals	dry_skull	estimate	453.8		260	P	A	P	453.8	260			453.8	260						8900	8.9	Christiansen and Wroe2007	1		1	1
222	Viverra_tangalunga	Christiansen and Wroe2007	Viverra_tangalunga				Mammals	Mammals	Mammals	dry_skull	estimate	326.6		192.6	P	A	P	326.6	192.6			326.6	192.6						5600	5.6	Christiansen and Wroe2007	1		1	1
223	Viverra_zibetha	Christiansen and Wroe2007	Viverra_zibetha				Mammals	Mammals	Mammals	dry_skull	estimate	384.6		228.2	P	A	P	384.6	228.2			384.6	228.2						8700	8.7	Christiansen and Wroe2007	1		1	1
224	Viverricula_indica	Christiansen and Wroe2007	Viverricula_indica				Mammals	Mammals	Mammals	dry_skull	estimate	202.2		115.8	P	A	P	202.2	115.8			202.2	115.8						2500	2.5	Christiansen and Wroe2007	1		1	1
225	Crocodylus_acutus	Erickson et al. 2012	Crocodylus_acutus				Reptiles	Reptiles	Reptiles	in_vivo	in_vivo	3999		2599	P	A	P	3999	2599			3999	2599	663	299	212			132000	132	Erickson et al. 2012	1		1	1
226	Crocodylus_intermedius	Erickson et al. 2012	Crocodylus_intermedius				Reptiles	Reptiles	Reptiles	in_vivo	in_vivo	6276		4283	P	A	P	6276	4283			6276	4283	529	237	132			182000	182	Erickson et al. 2012	1		1	1
227	Crocodylus_johnsoni	Erickson et al. 2012	Crocodylus_johnsoni				Reptiles	Reptiles	Reptiles	in_vivo	in_vivo	1292		629	P	A	P	1292	629			1292	629						20000	20	Erickson et al. 2012	1		1	1
228	Crocodylus_mindorensis	Erickson et al. 2012	Crocodylus_mindorendis		Crocodylus_mindorensis		Reptiles	Reptiles	Reptiles	in_vivo	in_vivo	2736		0	P	A	P	2736	0			2736	0	183	79	52			69000	69	Erickson et al. 2012	1		1	1
229	Crocodylus_moreletii	Erickson et al. 2012	Crocodylus_moreletti		Crocodylus_moreletii		Reptiles	Reptiles	Reptiles	in_vivo	in_vivo	4399		3069	P	A	P	4399	3069			4399	3069	120	55	34			110000	110	Erickson et al. 2012	1		1	1
230	Crocodylus_niloticus	Erickson et al. 2012	Crocodylus_niloticus				Reptiles	Reptiles	Reptiles	in_vivo	in_vivo	3043		2007	P	A	P	3043	2007			3043	2007	659	384	253			86000	86	Erickson et al. 2012	1		1	1
231	Crocodylus_novaeguineae	Erickson et al. 2012	Crocodylus_novaeguineae				Reptiles	Reptiles	Reptiles	in_vivo	in_vivo	5360		3928	P	A	P	5360	3928			5360	3928	421	217	142			154000	154	Erickson et al. 2012	1		1	1
232	Crocodylus_palustris	Erickson et al. 2012	Crocodylus_palustris				Reptiles	Reptiles	Reptiles	in_vivo	in_vivo	7295		4194	P	A	P	7295	4194			7295	4194	544	308	221			207000	207	Erickson et al. 2012	1		1	1
233	Crocodylus_porosus	Erickson et al. 2012	Crocodylus_porosus				Reptiles	Reptiles	Reptiles	in_vivo	in_vivo	8983		5792	P	A	P	8983	5792			8983	5792	749	408	264			272000	272	Erickson et al. 2012	1		1	1
234	Crocodylus_rhombifer	Erickson et al. 2012	Crocodylus_rhombifer				Reptiles	Reptiles	Reptiles	in_vivo	in_vivo	2107		1379	P	A	P	2107	1379			2107	1379	135	53	39			52000	52	Erickson et al. 2012	1		1	1
235	Crocodylus_siamensis	Erickson et al. 2012	Crocodylus_siamensis				Reptiles	Reptiles	Reptiles	in_vivo	in_vivo	3415		2227	P	A	P	3415	2227			3415	2227	147	77	49			69000	69	Erickson et al. 2012	1		1	1
236	Mecistops_cataphractus	Erickson et al. 2012	Mecistops_cataphractus				Reptiles	Reptiles	Reptiles	in_vivo	in_vivo	2082		0	P	A	P	2082	0			2082	0	382	170	76.6			67000	67	Erickson et al. 2012	1		1	1
237	Osteolaemus_tetraspis	Erickson et al. 2012	Osteolamus_tetrapsis		Osteolaemus_tetraspis		Reptiles	Reptiles	Reptiles	in_vivo	in_vivo	1787		1164	P	A	P	1787	1164			1787	1164	228.97	141.32				17000	17	Erickson et al. 2012	1		1	1
238	Gavialis_gangeticus	Erickson et al. 2012	Gavialis_gangeticus				Reptiles	Reptiles	Reptiles	in_vivo	in_vivo	1895		924	P	A	P	1895	924			1895	924	711	231	120			112000	112	Erickson et al. 2012	1		1	1
239	Tomistoma_schlegelii	Erickson et al. 2012	Tomistoma_schlegelii				Reptiles	Reptiles	Reptiles	in_vivo	in_vivo	3397		2099	P	A	P	3397	2099			3397	2099	459	206	122			142000	142	Erickson et al. 2012	1		1	1
240	Alligator_mississippiensis	Erickson et al. 2012	Alligator_mississippiensis				Reptiles	Reptiles	Reptiles	in_vivo	in_vivo	5117		3340	P	A	P	5117	3340			5117	3340	689	371	236			142000	142	Erickson et al. 2012	1		1	1
241	Alligator_sinensis	Erickson et al. 2012	Alligator_sinensis				Reptiles	Reptiles	Reptiles	in_vivo	in_vivo	1084		735	P	A	P	1084	735			1084	735	212	122	83			14000	14	Erickson et al. 2012	1		1	1
242	Caiman_crocodilus	Erickson et al. 2012	Caiman_crocodilus				Reptiles	Reptiles	Reptiles	in_vivo	in_vivo	1215		821	P	A	P	1215	821			1215	821	237	145	91			20000	20	Erickson et al. 2012	1		1	1
243	Caiman_latirostris	Erickson et al. 2012	Caiman_latirostris				Reptiles	Reptiles	Reptiles	in_vivo	in_vivo	1467		1063	P	A	P	1467	1063			1467	1063	249	149	98			30000	30	Erickson et al. 2012	1		1	1
244	Caiman_yacare	Erickson et al. 2012	Caiman_yacare				Reptiles	Reptiles	Reptiles	in_vivo	in_vivo	971		646	P	A	P	971	646			971	646	337	196	126			18000	18	Erickson et al. 2012	1		1	1
245	Melanosuchus_niger	Erickson et al. 2012	Melanosuchus_niger				Reptiles	Reptiles	Reptiles	in_vivo	in_vivo	2696		1911	P	A	P	2696	1911			2696	1911	540	350	190			59000	59	Erickson et al. 2012	1		1	1
246	Paleosuchus_palpebrosus	Erickson et al. 2012	Paleosuchus_palpebrosus				Reptiles	Reptiles	Reptiles	in_vivo	in_vivo	900		576	P	A	P	900	576			900	576	360	210	116			13000	13	Erickson et al. 2012	1		1	1
247	Paleosuchus_trigonatus	Erickson et al. 2012	Paleosuchus_trigonatus				Reptiles	Reptiles	Reptiles	in_vivo	in_vivo	1082		682	P	A	P	1082	682			1082	682	192	121	79			22000	22	Erickson et al. 2012	1		1	1
248	Molossus_sinaloae	Santana et al. 2015	Molossus_sinaloe		Molossus_sinaloae		Mammals	Mammals	Bats	in_vivo	in_vivo			11.21	A	A	A	11.21	11.21			11.21	11.21						21	0.021	Santana et al. 2015	1		1	1
249	Artibeus_jamaicensis	Santana et al. 2015	Artibeus_jamaicensis				Mammals	Mammals	Bats	in_vivo	in_vivo			17.34	A	A	A	17.34	17.34			17.34	17.34						48.5	0.0485	Santana et al. 2015	1		1	0
250	Artibeus_lituratus	Santana et al. 2015	Artibeus_lituratus				Mammals	Mammals	Bats	in_vivo	in_vivo			32	A	A	A	32	32			32	32						73	0.073	Santana et al. 2015	1		1	1
251	Carollia_castanea	Santana et al. 2015	Carollia_castanea				Mammals	Mammals	Bats	in_vivo	in_vivo			4.08	A	A	A	4.08	4.08			4.08	4.08						12	0.012	Santana et al. 2015	1		1	1
252	Centurio_senex	Santana et al. 2015	Centurio_senex				Mammals	Mammals	Bats	in_vivo	in_vivo			4.1	A	A	A	4.1	4.1			4.1	4.1						22	0.022	Santana et al. 2015	1		1	1
253	Chiroderma_villosum	Santana et al. 2015	Chiroderma_villosum				Mammals	Mammals	Bats	in_vivo	in_vivo			10.64	A	A	A	10.64	10.64			10.64	10.64						20	0.02	Santana et al. 2015	1		1	1
254	Dermanura_watsoni	Santana et al. 2015	Dermanura_watsoni				Mammals	Mammals	Bats	in_vivo	in_vivo			6.22	A	A	A	6.22	6.22			6.22	6.22						13.5	0.0135	Santana et al. 2015	1		0	0
255	Micronycteris_brachyotis	Santana et al. 2015	Lampronycteris_brachyotis		Micronycteris_brachyotis		Mammals	Mammals	Bats	in_vivo	in_vivo			7.6	A	A	A	7.6	7.6			7.6	7.6						11	0.011	Santana et al. 2015	1		1	1
256	Lophostoma_brasiliense	Santana et al. 2015	Lophostoma_brasiliense				Mammals	Mammals	Bats	in_vivo	in_vivo			6.98	A	A	A	6.98	6.98			6.98	6.98						8.9	0.0089	Santana et al. 2015	1		1	1
257	Lophostoma_silvicolum	Santana et al. 2015	Lophostoma_silvicolum				Mammals	Mammals	Bats	in_vivo	in_vivo			28.4	A	A	A	28.4	28.4			28.4	28.4						34	0.034	Santana et al. 2015	1		1	1
258	Micronycteris_hirsuta	Santana et al. 2015	Micronycteris_hirsuta				Mammals	Mammals	Bats	in_vivo	in_vivo			11.82	A	A	A	11.82	11.82			11.82	11.82						14.3	0.0143	Santana et al. 2015	1		1	1
259	Micronycteris_microtis	Santana et al. 2015	Micronycteris_microtis				Mammals	Mammals	Bats	in_vivo	in_vivo			5.15	A	A	A	5.15	5.15			5.15	5.15						7.3	0.0073	Santana et al. 2015	1		1	1
260	Mimon_crenulatum	Santana et al. 2015	Mimon_crenulatum				Mammals	Mammals	Bats	in_vivo	in_vivo			9.72	A	A	A	9.72	9.72			9.72	9.72						14.5	0.0145	Santana et al. 2015	1		1	1
261	Phyllostomus_hastatus	Santana et al. 2015	Phyllostomus_hastatus				Mammals	Mammals	Bats	in_vivo	in_vivo			22.75	A	A	A	22.75	22.75			22.75	22.75						126.5	0.1265	Santana et al. 2015	1		1	0
262	Platyrrhinus_helleri	Santana et al. 2015	Platyrrhinus_helleri				Mammals	Mammals	Bats	in_vivo	in_vivo			11.5	A	A	A	11.5	11.5			11.5	11.5						15.8	0.0158	Santana et al. 2015	1		1	1
263	Tonatia_saurophila	Santana et al. 2015	Tonatia_saurophila				Mammals	Mammals	Bats	in_vivo	in_vivo			18.8	A	A	A	18.8	18.8			18.8	18.8						29.2	0.0292	Santana et al. 2015	1		1	1
264	Trachops_cirrhosus	Santana et al. 2015	Trachops_cirrhosus				Mammals	Mammals	Bats	in_vivo	in_vivo			13.27	A	A	A	13.27	13.27			13.27	13.27						27.8	0.0278	Santana et al. 2015	1		1	1
265	Uroderma_bilobatum	Santana et al. 2015	Uroderma_bilobatum				Mammals	Mammals	Bats	in_vivo	in_vivo			5.75	A	A	A	5.75	5.75			5.75	5.75						15.5	0.0155	Santana et al. 2015	1		1	0
266	Dactyloa_frenata	Wittorski et al. 2015	Anolis_frenatus		Dactyloa_frenata		Reptiles	Reptiles	Reptiles	in_vivo	in_vivo			10.51	A	A	A	10.51	10.51			10.51	10.51	19.96	11.5	9.53	73.88	F	51.7	0.0517	Meiri 2010	1		1	0
267	Anolis_chloris	Wittorski et al. 2015	Anolis_chloris				Reptiles	Reptiles	Reptiles	in_vivo	in_vivo			3.18	A	A	A	3.18	3.18			3.18	3.18	13.6	7.48	5.42	52.55	F	1.72	0.00172	Meiri 2010	1		1	0
268	Anolis_oxylophus	Wittorski et al. 2015	Anolis_oxylophus				Reptiles	Reptiles	Reptiles	in_vivo	in_vivo			4.43	A	A	A	4.43	4.43			4.43	4.43	13.82	7.7	6.26	55.28	F	5	0.005	Meiri 2010	1		1	1
269	Norops_auratus	Wittorski et al. 2015	Anolis_auratus		Norops_auratus		Reptiles	Reptiles	Reptiles	in_vivo	in_vivo			2.87	A	A	A	2.87	2.87			2.87	2.87	11.81	6.13	4.85	46.03	F	1.93	0.00193	Meiri 2010	1		1	1
270	Norops_humilis	Wittorski et al. 2015	Anolis_humilis		Norops_humilis		Reptiles	Reptiles	Reptiles	in_vivo	in_vivo			2.13	A	A	A	2.13	2.13			2.13	2.13	10.33	5.64	4.32	35.16	F	1.8	0.0018	Meiri 2010	1		1	1
271	Anolis_heterodermus	Wittorski et al. 2015	Anolis_heterodermus				Reptiles	Reptiles	Reptiles	in_vivo	in_vivo			16.69	A	A	A	16.69	16.69			16.69	16.69	19.78	9.85	8.74	70.74	F				0	no M_Body	0	0
272	Anolis_limifrons	Wittorski et al. 2015	Anolis_limifrons				Reptiles	Reptiles	Reptiles	in_vivo	in_vivo			1.96	A	A	A	1.96	1.96			1.96	1.96	10.89	5.56	4.24	39.24	F	1.8	0.0018	Meiri 2010	1		1	1
273	Anolis_pentaprion	Wittorski et al. 2015	Anolis_pentaprion				Reptiles	Reptiles	Reptiles	in_vivo	in_vivo			3.95	A	A	A	3.95	3.95			3.95	3.95	13.23	7.67	5.6	46.63	F				0	no M_Body	0	0
274	Anolis_equestris	Wittorski et al. 2015	Anolis_equestris				Reptiles	Reptiles	Reptiles	in_vivo	in_vivo			21.17	A	A	A	21.17	21.17			21.17	21.17	43.71	25.32	17.13	133.34	F	55.98	0.05598	Meiri 2010	1		1	0
275	Anolis_carolinensis	Wittorski et al. 2015	Anolis_carolinesis		Anolis_carolinensis		Reptiles	Reptiles	Reptiles	in_vivo	in_vivo			2.37	A	A	A	2.37	2.37			2.37	2.37	14.95	7.95	5.66	51.77	F				0	no M_Body	0	0
276	Anolis_cristatellus	Wittorski et al. 2015	Anolis_cristatellus				Reptiles	Reptiles	Reptiles	in_vivo	in_vivo			2.53	A	A	A	2.53	2.53			2.53	2.53	14.44	8.36	6.37	48.62	F	8.4	0.0084	Meiri 2010	1		1	0
277	Anolis_gundlachi	Wittorski et al. 2015	Anolis_gundlachi				Reptiles	Reptiles	Reptiles	in_vivo	in_vivo			2.23	A	A	A	2.23	2.23			2.23	2.23	14.15	7.57	5.85	46.02	F	6.9	0.0069	Meiri 2010	1		1	0
278	Anolis_pulchellus	Wittorski et al. 2015	Anolis_pulchellus				Reptiles	Reptiles	Reptiles	in_vivo	in_vivo			2.48	A	A	A	2.48	2.48			2.48	2.48	12.74	6.13	4.96	40.09	F	1.625	0.001625	Meiri 2010	1		1	0
279	Anolis_distichus	Wittorski et al. 2015	Anolis_distichus				Reptiles	Reptiles	Reptiles	in_vivo	in_vivo			1.41	A	A	A	1.41	1.41			1.41	1.41	11.72	7.34	5.29	41.08	F	3.145	0.003145	Meiri 2010	1		1	0
280	Anolis_valencienni	Wittorski et al. 2015	Anolis_valencienni				Reptiles	Reptiles	Reptiles	in_vivo	in_vivo			3.31	A	A	A	3.31	3.31			3.31	3.31	17.04	8.11	6.45	61.18	F	6.2	0.0062	Meiri 2010	1		1	0
281	Dactyloa_frenata	Wittorski et al. 2015	Anolis_frenatus		Dactyloa_frenata		Reptiles	Reptiles	Reptiles	in_vivo	in_vivo			27.29	A	A	A	27.29	27.29			27.29	27.29	28.84	16.36	13.36	114.62	M	51.7	0.0517	Meiri 2010	1		1	1
282	Anolis_chloris	Wittorski et al. 2015	Anolis_chloris				Reptiles	Reptiles	Reptiles	in_vivo	in_vivo			5.86	A	A	A	5.86	5.86			5.86	5.86	16.42	8.65	6.82	59.41	M	1.72	0.00172	Meiri 2010	1		1	1
283	Norops_auratus	Wittorski et al. 2015	Anolis_auratus		Norops_auratus		Reptiles	Reptiles	Reptiles	in_vivo	in_vivo			2.15	A	A	A	2.15	2.15			2.15	2.15	11.79	5.93	4.82	43.52	M	1.93	0.00193	Meiri 2010	1		1	0
284	Norops_humilis	Wittorski et al. 2015	Anolis_humilis		Norops_humilis		Reptiles	Reptiles	Reptiles	in_vivo	in_vivo			1.77	A	A	A	1.77	1.77			1.77	1.77	9.99	5.54	4.27	32.73	M	1.8	0.0018	Meiri 2010	1		1	0
285	Anolis_heterodermus	Wittorski et al. 2015	Anolis_heterodermus				Reptiles	Reptiles	Reptiles	in_vivo	in_vivo			17.57	A	A	A	17.57	17.57			17.57	17.57	20.97	10.56	9.3	71.34	M				0	no M_Body	0	0
286	Anolis_limifrons	Wittorski et al. 2015	Anolis_limifrons				Reptiles	Reptiles	Reptiles	in_vivo	in_vivo			1.42	A	A	A	1.42	1.42			1.42	1.42	10.63	5.4	4.23	37.6	M	1.8	0.0018	Meiri 2010	1		1	0
287	Anolis_equestris	Wittorski et al. 2015	Anolis_equestris				Reptiles	Reptiles	Reptiles	in_vivo	in_vivo			57.62	A	A	A	57.62	57.62			57.62	57.62	49.3	28.89	20.94	157.35	M	55.98	0.05598	Meiri 2010	1		1	1
288	Anolis_carolinensis	Wittorski et al. 2015	Anolis_carolinesis		Anolis_carolinensis		Reptiles	Reptiles	Reptiles	in_vivo	in_vivo			5.18	A	A	A	5.18	5.18			5.18	5.18	19.11	10.18	7.17	63.75	M				0	no M_Body	0	0
289	Anolis_cristatellus	Wittorski et al. 2015	Anolis_cristatellus				Reptiles	Reptiles	Reptiles	in_vivo	in_vivo			7.53	A	A	A	7.53	7.53			7.53	7.53	19.82	12.01	9.19	68.57	M	8.4	0.0084	Meiri 2010	1		1	1
290	Anolis_gundlachi	Wittorski et al. 2015	Anolis_gundlachi				Reptiles	Reptiles	Reptiles	in_vivo	in_vivo			6.65	A	A	A	6.65	6.65			6.65	6.65	19.8	10.44	8.6	63.25	M	6.9	0.0069	Meiri 2010	1		1	1
291	Anolis_pulchellus	Wittorski et al. 2015	Anolis_pulchellus				Reptiles	Reptiles	Reptiles	in_vivo	in_vivo			2.52	A	A	A	2.52	2.52			2.52	2.52	13.43	6.3	5.36	42.13	M	1.625	0.001625	Meiri 2010	1		1	1
292	Anolis_distichus	Wittorski et al. 2015	Anolis_distichus				Reptiles	Reptiles	Reptiles	in_vivo	in_vivo			2.8	A	A	A	2.8	2.8			2.8	2.8	13.27	8.59	6.1	46.81	M	3.145	0.003145	Meiri 2010	1		1	1
293	Anolis_valencienni	Wittorski et al. 2015	Anolis_valencienni				Reptiles	Reptiles	Reptiles	in_vivo	in_vivo			6.7	A	A	A	6.7	6.7			6.7	6.7	19.89	9.59	7.97	67.47	M	6.2	0.0062	Meiri 2010	1		1	1
294	Certhidea_olivacea	Herrel et al. 2005	Certhidea_olivaeca		Certhidea_olivacea		Dinosaurs	Birds	Finches	in_vivo	in_vivo			1.67	A	A	A	1.67	1.67			1.67	1.67	27.24	12.53	10.64			9.88	0.00988	Herrel et al. 2005	1		1	1
295	Cactospiza_pallida	Herrel et al. 2005	Cactospiza_pallida				Dinosaurs	Birds	Finches	in_vivo	in_vivo			1.59	A	A	A	1.59	1.59			1.59	1.59	34.64	15.52	13.4			22.5	0.0225	Herrel et al. 2005	1		1	1
296	Camarhynchus_parvulus	Herrel et al. 2005	Camarhynchus_parvulus				Dinosaurs	Birds	Finches	in_vivo	in_vivo			4.59	A	A	A	4.59	4.59			4.59	4.59	26.36	13.89	12.28			12.63	0.01263	Herrel et al. 2005	1		1	1
297	Camarhynchus_psittacula	Herrel et al. 2005	Camarhynchus_psittacula				Dinosaurs	Birds	Finches	in_vivo	in_vivo			10.06	A	A	A	10.06	10.06			10.06	10.06	27.51	14.83	14.05			17	0.017	Herrel et al. 2005	1		1	1
298	Geospiza_fortis	Herrel et al. 2005	Geospiza_fortis				Dinosaurs	Birds	Finches	in_vivo	in_vivo			17.4	A	A	A	17.4	17.4			17.4	17.4	32.49	15.87	15.46			21.46	0.02146	Herrel et al. 2005	1		1	1
299	Geospiza_fuliginosa	Herrel et al. 2005	Geospiza_fuliginosa				Dinosaurs	Birds	Finches	in_vivo	in_vivo			5.26	A	A	A	5.26	5.26			5.26	5.26	27.74	13.91	12.43			14.13	0.01413	Herrel et al. 2005	1		1	1
300	Geospiza_magnirostris	Herrel et al. 2005	Geospiza_magnirostris				Dinosaurs	Birds	Finches	in_vivo	in_vivo			70.77	A	A	A	70.77	70.77			70.77	70.77	37.17	19.58	18.97			23.77	0.02377	Herrel et al. 2005	1		1	1
301	Geospiza_scandens	Herrel et al. 2005	Geospiza_scandens				Dinosaurs	Birds	Finches	in_vivo	in_vivo			7.76	A	A	A	7.76	7.76			7.76	7.76	36.3	15.31	14.01			21.56	0.02156	Herrel et al. 2005	1		1	1
302	Platyspiza_crassirostris	Herrel et al. 2005	Platyspiza_crassirostris				Dinosaurs	Birds	Finches	in_vivo	in_vivo			15.56	A	A	A	15.56	15.56			15.56	15.56	31.6	17.08	16.29			31.3	0.0313	Herrel et al. 2005	1		1	1
303	Accipiter_striatus	Sustaita and Hertel 2010	Accipiter_striatus				Dinosaurs	Birds	Dinosaurs	in_vivo	in_vivo			1.42	A	A	A	1.42	1.42			1.42	1.42	44.53	25.19			F	165.5	0.1655	Sustaita and Hertel 2010	1		1	1
304	Accipiter_striatus	Sustaita and Hertel 2010	Accipiter_striatus				Dinosaurs	Birds	Dinosaurs	in_vivo	in_vivo			1.19	A	A	A	1.19	1.19			1.19	1.19	44.53	25.19			M	117	0.117	Sustaita and Hertel 2010	1		1	0
305	Accipiter_cooperii	Sustaita and Hertel 2010	Accipiter_cooperii				Dinosaurs	Birds	Dinosaurs	in_vivo	in_vivo			3.1	A	A	A	3.1	3.1			3.1	3.1	67.94	33.8			F	450.4	0.4504	Sustaita and Hertel 2010	1		1	1
306	Accipiter_cooperii	Sustaita and Hertel 2010	Accipiter_cooperii				Dinosaurs	Birds	Dinosaurs	in_vivo	in_vivo			1.91	A	A	A	1.91	1.91			1.91	1.91	67.94	33.8			M	283.1	0.2831	Sustaita and Hertel 2010	1		1	0
307	Falco_sparverius	Sustaita and Hertel 2010	Falco_sparverius				Dinosaurs	Birds	Dinosaurs	in_vivo	in_vivo			3.33	A	A	A	3.33	3.33			3.33	3.33	43	26	20		F	110.9	0.1109	Sustaita and Hertel 2010	1		1	0
308	Falco_sparverius	Sustaita and Hertel 2010	Falco_sparverius				Dinosaurs	Birds	Dinosaurs	in_vivo	in_vivo			3.99	A	A	A	3.99	3.99			3.99	3.99	43	26	20		M	108.9	0.1089	Sustaita and Hertel 2010	1		1	1
309	Falco_columbarius	Sustaita and Hertel 2010	Falco_columbarius				Dinosaurs	Birds	Dinosaurs	in_vivo	in_vivo			4.74	A	A	A	4.74	4.74			4.74	4.74	45	27	20		F	214.7	0.2147	Sustaita and Hertel 2010	1		1	1
310	Falco_columbarius	Sustaita and Hertel 2010	Falco_columbarius				Dinosaurs	Birds	Dinosaurs	in_vivo	in_vivo			4.17	A	A	A	4.17	4.17			4.17	4.17	45	27	20		M	138	0.138	Sustaita and Hertel 2010	1		1	0
311	Falco_peregrinus	Sustaita and Hertel 2010	Falco_peregrinus				Dinosaurs	Birds	Dinosaurs	in_vivo	in_vivo			12.96	A	A	A	12.96	12.96			12.96	12.96	63	38	27		F	773.8	0.7738	Sustaita and Hertel 2010	1		1	1
312	Falco_peregrinus	Sustaita and Hertel 2010	Falco_peregrinus				Dinosaurs	Birds	Dinosaurs	in_vivo	in_vivo			9.23	A	A	A	9.23	9.23			9.23	9.23	63	38	27		M	585.3	0.5853	Sustaita and Hertel 2010	1		1	0
313	Falco_mexicanus	Sustaita and Hertel 2010	Falco_mexicanus				Dinosaurs	Birds	Dinosaurs	in_vivo	in_vivo			13.79	A	A	A	13.79	13.79			13.79	13.79	69.86	43			M	503.7	0.5037	Sustaita and Hertel 2010	1		1	1
314	Gallus_gallus	this study	Gallus_gallus				Dinosaurs	Birds	Dinosaurs	muscle	estimate			8.79858	A	A	A	8.79858	8.79858			8.79858	8.79858	73	32.05	30.4			839.684	0.839684	Dunning 2007	1		1	1
315	Struthio_camelus	this study	Struthio_camelus				Dinosaurs	Birds	Dinosaurs	muscle	estimate			33.4047	A	A	A	33.4047	33.4047			33.4047	33.4047	199	93.8113				111000	111	Dunning 2007	1		1	0
316	Buteo_buteo	this study	Buteo_buteo				Dinosaurs	Birds	Dinosaurs	muscle	estimate			8.85141	A	A	A	8.85141	8.85141			8.85141	8.85141	80	39.3667	35			685.217	0.685217	Dunning 2007	1		1	1
317	Larus_fuscus	this study	Larus_fuscus				Dinosaurs	Birds	Dinosaurs	muscle	estimate			14.8232	A	A	A	14.8232	14.8232			14.8232	14.8232	120.5	39.0333	32.5			740.053	0.740053	Dunning 2007	1		1	1
318	Branta_canadensis	this study	Branta_canadensis				Dinosaurs	Birds	Dinosaurs	muscle	estimate			27.5471	A	A	A	27.5471	27.5471			27.5471	27.5471	122	34.5	41.8			3486.28	3.48628	Dunning 2007	1		1	1
319	Sphenodon_punctatus	Jones and Lappin 2009	Sphenodon_punctatus				Reptiles	Reptiles	Reptiles	in_vivo	in_vivo	163.5		81.8	P	A	P	163.5	81.8			163.5	81.8	51.6	43.6002		220	F	590	0.59	Jones and Lappin 2009	1		1	0
320	Sphenodon_punctatus	Jones and Lappin 2009	Sphenodon_punctatus				Reptiles	Reptiles	Reptiles	in_vivo	in_vivo	238.3		119.1	P	A	P	238.3	119.1			238.3	119.1	62	50.7555		250	M	778	0.778	Jones and Lappin 2009	1		1	1
321	Sciurus_carolinensis	Cox et al. 2012	Sciurus_carolinensis				Mammals	Mammals	Mammals	FE	estimate	83.63		26.15	P	A	P	83.63	26.15			83.63	26.15						545.4	0.5454	Jones et al. 2009	1		1	1
322	Cavia_porcellus	Cox et al. 2012	Cavia_porcellus				Mammals	Mammals	Mammals	FE	estimate	69.79		18.48	P	A	P	69.79	18.48			69.79	18.48						355	0.355	Cox et al. 2012	1		1	1
323	Cavia_porcellus	Cox et al. 2012	Cavia_porcellus				Mammals	Mammals	Mammals	in_vivo	in_vivo			31.12	A	A	A	31.12	31.12			31.12	31.12						355	0.355	Cox et al. 2012	1		1	0
324	Rattus_norvegicus	Cox et al. 2012	Rattus_norvegicus				Mammals	Mammals	Mammals	FE	estimate	76.78		24.65	P	A	P	76.78	24.65			76.78	24.65						321	0.321	Cox et al. 2012	1		1	1
325	Rattus_norvegicus	Cox et al. 2012	Rattus_norvegicus				Mammals	Mammals	Mammals	in_vivo	in_vivo			19.45	A	A	A	19.45	19.45			19.45	19.45						321	0.321	Cox et al. 2012	1		1	0
326	Homo_sapiens	van der Bilt et al. 2008	Homo_sapiens				Mammals	Mammals	Mammals	in_vivo	in_vivo	569			P	P	P	569	569			569	569						58540.6	58.5406	Jones et al. 2009	1		1	0
327	Homo_sapiens	van der Bilt et al. 2008	Homo_sapiens				Mammals	Mammals	Mammals	in_vivo	in_vivo	652			P	P	P	652	652			652	652					M	58540.6	58.5406	Jones et al. 2009	1		1	0
328	Homo_sapiens	van der Bilt et al. 2008	Homo_sapiens				Mammals	Mammals	Mammals	in_vivo	in_vivo	553			P	P	P	553	553			553	553					F	58540.6	58.5406	Jones et al. 2009	1		1	0
329	Oryctolagus_cuniculus	Watson et al. 2014	Oryctolagus_cuniculus				Mammals	Mammals	Mammals	in_vivo	in_vivo			95.2	A	A	A	95.2	95.2			95.2	95.2						1590.57	1.59057	Jones et al. 2009	1		1	1
330	Oryctolagus_cuniculus	Watson et al. 2014	Oryctolagus_cuniculus				Mammals	Mammals	Mammals	MDA	estimate			87.8	A	A	A	87.8	87.8			87.8	87.8						1590.57	1.59057	Jones et al. 2009	1		1	0
331	Microcebus_murinus	Thomas et al. 2015	Microcebus_murinus				Mammals	Mammals	Mammals	in_vivo	in_vivo	35.61			P	P	P	35.61	35.61			35.61	35.61	35.7	22.17	16.26		F	99	0.099	Thomas et al. 2015	1		1	1
332	Microcebus_murinus	Thomas et al. 2015	Microcebus_murinus				Mammals	Mammals	Mammals	in_vivo	in_vivo	31.36			P	P	P	31.36	31.36			31.36	31.36	35.12	21.63	15.72		M	81.18	0.08118	Thomas et al. 2015	1		1	0
333	Sus_scrofa	Bousdras et al. 2006	Sus_scrofa				Mammals	Mammals	Mammals	in_vivo	in_vivo	375	350		P	M	P	375	350			375	350						120000	120	Bousdras et al. 2006	1		1	1
334	Panthera_leo	McHenry et al. 2007	Panthera_leo				Mammals	Mammals	Mammals	FE	estimate			3388	A	A	A	3388	3388			3388	3388						158624	158.624	Jones et al. 2009	1		1	0
335	Smilodon_fatalis	McHenry et al. 2007	Smilodon_fatalis				Mammals	Mammals	Mammals	FE	estimate			1104	A	A	A	1104	1104			1104	1104						229000	229	McHenry et al. 2007	1		1	0
336	Canis_lupus	Bourke et al. 2008	Canis_lupus				Mammals	Mammals	Mammals	FE	estimate	1091.17		511.8	P	A	P	1091.17	511.8			1091.17	511.8						31756.5	31.7565	Jones et al. 2009	1		1	0
337	Struthio_camelus	Gussekloo and Bout 2005	Struthio_camelus				Dinosaurs	Birds	Dinosaurs	muscle	estimate			52.7	A	A	A	52.7	52.7			52.7	52.7	199	93.8113				111000	111	Dunning 2007	1		1	1
338	Dromaius_novaehollandiae	Gussekloo and Bout 2005	Dromaius_novaehollandiae				Dinosaurs	Birds	Dinosaurs	muscle	estimate			9.2	A	A	A	9.2	9.2			9.2	9.2	163	81.6				34200	34.2	Dunning 2007	1		1	1
339	Rhea_americana	Gussekloo and Bout 2005	Rhea_americana				Dinosaurs	Birds	Dinosaurs	muscle	estimate			25.8	A	A	A	25.8	25.8			25.8	25.8	169.7	72.6				23000	23	Dunning 2007	1		1	1
340	Laudakia_stellio	Herrel et al. 1998	Stellagama_stellio		Laudakia_stellio		Reptiles	Reptiles	Reptiles	muscle	estimate			10.2	A	A	A	10.2	10.2			10.2	10.2	24	18.9				40	0.04	Herrel et al. 1998	1		1	1
341	Uromastyx_acanthinura	Herrel et al. 1998	Uromastyx_acanthinura				Reptiles	Reptiles	Reptiles	muscle	estimate			13.7	A	A	A	13.7	13.7			13.7	13.7	28.2	26.6				110	0.11	Herrel et al. 1998	1		1	0
342	Corucia_zebrata	Herrel et al. 1998	Corucia_zebrata				Reptiles	Reptiles	Reptiles	muscle	estimate			58.9	A	A	A	58.9	58.9			58.9	58.9	51.1	40.8				380	0.38	Herrel et al. 1998	1		1	1
343	Tiliqua_scincoides	Herrel et al. 1998	Tiliqua_scincoides				Reptiles	Reptiles	Reptiles	muscle	estimate			41.3	A	A	A	41.3	41.3			41.3	41.3	65.8	36.7				510	0.51	Herrel et al. 1998	1		1	1
344	Anolis_garmani	Herrel and O'Reilly 2006	Anolis_garmani				Reptiles	Reptiles	Reptiles	in_vivo	in_vivo			11.05	A	A	A	11.05	11.05			11.05	11.05	23.92	13.38	10.58			16.71	0.01671	Herrel and O'Reilly 2006	1		1	1
345	Caracal_caracal	Hartstone-Rose et al. 2012	Caracal_caracal				Mammals	Mammals	Mammals	muscle	estimate	989.393		763.644	P	A	P	989.393	763.644			989.393	763.644						16590	16.59	Hartstone-Rose et al. 2012	1		1	1
346	Leptailurus_serval	Hartstone-Rose et al. 2012	Leptailurus_serval				Mammals	Mammals	Mammals	muscle	estimate	892.013		667.343	P	A	P	892.013	667.343			892.013	667.343						13900	13.9	Hartstone-Rose et al. 2012	1		1	1
347	Leopardus_pardalis	Hartstone-Rose et al. 2012	Leopardus_pardalis				Mammals	Mammals	Mammals	muscle	estimate	997.336		719.71	P	A	P	997.336	719.71			997.336	719.71						11590	11.59	Hartstone-Rose et al. 2012	1		1	1
348	Lynx_rufus	Hartstone-Rose et al. 2012	Lynx_rufus				Mammals	Mammals	Mammals	muscle	estimate	691.271		505.141	P	A	P	691.271	505.141			691.271	505.141						15500	15.5	Hartstone-Rose et al. 2012	1		1	1
349	Neofelis_nebulosa	Hartstone-Rose et al. 2012	Neofelis_nebulosa				Mammals	Mammals	Mammals	muscle	estimate	1582.2		1068.43	P	A	P	1582.2	1068.43			1582.2	1068.43						24000	24	Hartstone-Rose et al. 2012	1		1	1
350	Panthera_onca	Hartstone-Rose et al. 2012	Panthera_onca				Mammals	Mammals	Mammals	muscle	estimate	6921.44		4938.33	P	A	P	6921.44	4938.33			6921.44	4938.33						100000	100	Hartstone-Rose et al. 2012	1		1	1
351	Panthera_pardus	Hartstone-Rose et al. 2012	Panthera_pardus				Mammals	Mammals	Mammals	muscle	estimate	2222.28		1630.36	P	A	P	2222.28	1630.36			2222.28	1630.36						34100	34.1	Hartstone-Rose et al. 2012	1		1	1
352	Panthera_uncia	Hartstone-Rose et al. 2012	Panthera_uncia				Mammals	Mammals	Mammals	muscle	estimate	2018.01		1457.17	P	A	P	2018.01	1457.17			2018.01	1457.17						38640	38.64	Hartstone-Rose et al. 2012	1		1	1
353	Panthera_tigris	Hartstone-Rose et al. 2012	Panthera_tigris				Mammals	Mammals	Mammals	muscle	estimate	8925.23		6901.33	P	A	P	8925.23	6901.33			8925.23	6901.33						200000	200	Hartstone-Rose et al. 2012	1		1	1
354	Pteropus_vampyrus	Dumont and Herrel 2003	Pteropus_vampyrus				Mammals	Mammals	Bats	in_vivo	in_vivo			84.7	A	A	A	84.7	84.7			84.7	84.7	85.3					1166.6	1.1666	Dumont and Herrel 2003	1		1	1
355	Pteropus_poliocephalus	Dumont and Herrel 2003	Pteropus_poliocephalus				Mammals	Mammals	Bats	in_vivo	in_vivo			63	A	A	A	63	63			63	63	72.8					820	0.82	Dumont and Herrel 2003	1		1	1
356	Eidolon_helvum	Dumont and Herrel 2003	Eidolon_helvum				Mammals	Mammals	Bats	in_vivo	in_vivo			77.9	A	A	A	77.9	77.9			77.9	77.9	60.4					272	0.272	Dumont and Herrel 2003	1		1	1
357	Rousettus_aegyptiacus	Dumont and Herrel 2003	Rousettus_aegyptiacus				Mammals	Mammals	Bats	in_vivo	in_vivo			18.81	A	A	A	18.81	18.81			18.81	18.81	45.5					179.2	0.1792	Dumont and Herrel 2003	1		1	1
358	Phyllostomus_hastatus	Dumont and Herrel 2003	Phyllostomus_hastatus				Mammals	Mammals	Bats	in_vivo	in_vivo			24.9	A	A	A	24.9	24.9			24.9	24.9	35.5					72.4	0.0724	Dumont and Herrel 2003	1		1	0
359	Cynopterus_brachyotis	Dumont and Herrel 2003	Cynopterus_brachyotis				Mammals	Mammals	Bats	in_vivo	in_vivo			12.3	A	A	A	12.3	12.3			12.3	12.3	28.1					43.6	0.0436	Dumont and Herrel 2003	1		1	1
360	Artibeus_jamaicensis	Dumont and Herrel 2003	Artibeus_jamaicensis				Mammals	Mammals	Bats	in_vivo	in_vivo			19.2	A	A	A	19.2	19.2			19.2	19.2	28					45	0.045	Dumont and Herrel 2003	1		1	0
361	Erophylla_sezekorni	Dumont and Herrel 2003	Erophylla_sezekorni				Mammals	Mammals	Bats	in_vivo	in_vivo			2.8	A	A	A	2.8	2.8			2.8	2.8	24.7					16.9	0.0169	Dumont and Herrel 2003	1		1	1
362	Monophyllus_redmani	Dumont and Herrel 2003	Monophyllus_redmani				Mammals	Mammals	Bats	in_vivo	in_vivo			1.4	A	A	A	1.4	1.4			1.4	1.4	22.6					13	0.013	Dumont and Herrel 2003	1		1	1
363	Carollia_perspicillata	Dumont and Herrel 2003	Carollia_perspicillata				Mammals	Mammals	Bats	in_vivo	in_vivo			4.4	A	A	A	4.4	4.4			4.4	4.4	22.2					18.4	0.0184	Dumont and Herrel 2003	1		1	0
364	Glossophaga_soricina	Dumont and Herrel 2003	Glossophaga_soricina				Mammals	Mammals	Bats	in_vivo	in_vivo			1.37	A	A	A	1.37	1.37			1.37	1.37	21.3					11.6	0.0116	Dumont and Herrel 2003	1		1	0
365	Myotis_simus	Aguirre et al. 2002	Myotis_simus				Mammals	Mammals	Bats	in_vivo	in_vivo			2.88	A	A	A	2.88	2.88			2.88	2.88	14.41		9.81			8.2	0.0082	Aguirre et al. 2002	1		1	1
366	Myotis_albescens	Aguirre et al. 2002	Myotis_albescens				Mammals	Mammals	Bats	in_vivo	in_vivo			2.18	A	A	A	2.18	2.18			2.18	2.18	13.7		7.03			4.64	0.00464	Aguirre et al. 2002	1		1	1
367	Myotis_nigricans	Aguirre et al. 2002	Myotis_nigricans				Mammals	Mammals	Bats	in_vivo	in_vivo			1.27	A	A	A	1.27	1.27			1.27	1.27	12.96		7.15			4.15	0.00415	Aguirre et al. 2002	1		1	1
368	Eptesicus_furinalis	Aguirre et al. 2002	Eptesicus_furinalis				Mammals	Mammals	Bats	in_vivo	in_vivo			7.3	A	A	A	7.3	7.3			7.3	7.3	14.75		8.53			8.8	0.0088	Aguirre et al. 2002	1		1	1
369	Molossus_rufus	Aguirre et al. 2002	Molossus_rufus				Mammals	Mammals	Bats	in_vivo	in_vivo			8.4	A	A	A	8.4	8.4			8.4	8.4	20.91		12.25			29	0.029	Aguirre et al. 2002	1		0	0
370	Molossus_molossus	Aguirre et al. 2002	Molossus_molossus				Mammals	Mammals	Bats	in_vivo	in_vivo			8.34	A	A	A	8.34	8.34			8.34	8.34	17.47		11.06			17.01	0.01701	Aguirre et al. 2002	1		0	0
371	Noctilio_albiventris	Aguirre et al. 2002	Noctilio_albiventris				Mammals	Mammals	Bats	in_vivo	in_vivo			11.91	A	A	A	11.91	11.91			11.91	11.91	21.47		16.38			34.19	0.03419	Aguirre et al. 2002	1		1	1
372	Noctilio_leporinus	Aguirre et al. 2002	Noctilio_leporinus				Mammals	Mammals	Bats	in_vivo	in_vivo			19.9	A	A	A	19.9	19.9			19.9	19.9	26.2		19.84			62.58	0.06258	Aguirre et al. 2002	1		1	1
373	Desmodus_rotundus	Aguirre et al. 2002	Desmodus_rotundus				Mammals	Mammals	Bats	in_vivo	in_vivo			8.6	A	A	A	8.6	8.6			8.6	8.6	25.17		15.19			40.85	0.04085	Aguirre et al. 2002	1		1	1
374	Glossophaga_soricina	Aguirre et al. 2002	Glossophaga_soricina				Mammals	Mammals	Bats	in_vivo	in_vivo			2.25	A	A	A	2.25	2.25			2.25	2.25	22.02		10.19			9.52	0.00952	Aguirre et al. 2002	1		1	1
375	Phyllostomus_discolor	Aguirre et al. 2002	Phyllostomus_discolor				Mammals	Mammals	Bats	in_vivo	in_vivo			21.61	A	A	A	21.61	21.61			21.61	21.61	28.8		14.86			36.65	0.03665	Aguirre et al. 2002	1		1	1
376	Phyllostomus_hastatus	Aguirre et al. 2002	Phyllostomus_hastatus				Mammals	Mammals	Bats	in_vivo	in_vivo			68	A	A	A	68	68			68	68	37.21		20.5			95	0.095	Aguirre et al. 2002	1		1	1
377	Phyllostomus_elongatus	Aguirre et al. 2002	Phyllostomus_elongatus				Mammals	Mammals	Bats	in_vivo	in_vivo			14.78	A	A	A	14.78	14.78			14.78	14.78	29.5		14.29			34.64	0.03464	Aguirre et al. 2002	1		1	1
378	Mimon_crenulatum	Aguirre et al. 2002	Mimon_crenulatum				Mammals	Mammals	Bats	in_vivo	in_vivo			6.96	A	A	A	6.96	6.96			6.96	6.96	22.57		11.44			16.46	0.01646	Aguirre et al. 2002	1		1	0
379	Micronycteris_minuta	Aguirre et al. 2002	Micronycteris_minuta				Mammals	Mammals	Bats	in_vivo	in_vivo			2.18	A	A	A	2.18	2.18			2.18	2.18	19.48		9.12			7.58	0.00758	Aguirre et al. 2002	1		1	1
380	Lophostoma_silvicolum	Aguirre et al. 2002	Lophostoma_silvicolum				Mammals	Mammals	Bats	in_vivo	in_vivo			21.63	A	A	A	21.63	21.63			21.63	21.63	24.6		15.04			27.32	0.02732	Aguirre et al. 2002	1		1	0
381	Carollia_perspicillata	Aguirre et al. 2002	Carollia_perspicillata				Mammals	Mammals	Bats	in_vivo	in_vivo			6.65	A	A	A	6.65	6.65			6.65	6.65	23.4		11.52			17.95	0.01795	Aguirre et al. 2002	1		1	1
382	Sturnira_lilium	Aguirre et al. 2002	Sturnira_lilium				Mammals	Mammals	Bats	in_vivo	in_vivo			7.72	A	A	A	7.72	7.72			7.72	7.72	23.26		12.55			19.63	0.01963	Aguirre et al. 2002	1		1	1
383	Artibeus_jamaicensis	Aguirre et al. 2002	Artibeus_jamaicensis				Mammals	Mammals	Bats	in_vivo	in_vivo			24.96	A	A	A	24.96	24.96			24.96	24.96	30.22		17.64			58.4	0.0584	Aguirre et al. 2002	1		1	1
384	Uroderma_bilobatum	Aguirre et al. 2002	Uroderma_bilobatum				Mammals	Mammals	Bats	in_vivo	in_vivo			9.5	A	A	A	9.5	9.5			9.5	9.5	26.45		13.43			23.3	0.0233	Aguirre et al. 2002	1		1	1
385	Platyrrhinus_lineatus	Aguirre et al. 2002	Platyrrhinus_lineatus				Mammals	Mammals	Bats	in_vivo	in_vivo			25.4	A	A	A	25.4	25.4			25.4	25.4	31.04		15.9			28	0.028	Aguirre et al. 2002	1		1	1
386	Avahi_laniger	Perry et al. 2011	Avahi_laniger				Mammals	Mammals	Mammals	muscle	estimate	55.62			P	P	P	55.62	55.62			55.62	55.62						1180	1.18	Perry et al. 2011	1		1	1
387	Cheirogaleus_medius	Perry et al. 2011	Cheirogaleus_medius				Mammals	Mammals	Mammals	muscle	estimate	15.4			P	P	P	15.4	15.4			15.4	15.4						280	0.28	Perry et al. 2011	1		1	1
388	Eulemur_collaris	Perry et al. 2011	Eulemur_collaris				Mammals	Mammals	Mammals	muscle	estimate	58.08			P	P	P	58.08	58.08			58.08	58.08						2050	2.05	Perry et al. 2011	1		0	0
389	Eulemur_coronatus	Perry et al. 2011	Eulemur_coronatus				Mammals	Mammals	Mammals	muscle	estimate	82.5			P	P	P	82.5	82.5			82.5	82.5						1660	1.66	Perry et al. 2011	1		1	1
390	Eulemur_flavifrons	Perry et al. 2011	Eulemur_flavifrons				Mammals	Mammals	Mammals	muscle	estimate	44.93			P	P	P	44.93	44.93			44.93	44.93						2440	2.44	Perry et al. 2011	1		0	0
391	Eulemur_mongoz	Perry et al. 2011	Eulemur_mongoz				Mammals	Mammals	Mammals	muscle	estimate	60.63			P	P	P	60.63	60.63			60.63	60.63						1620	1.62	Perry et al. 2011	1		1	1
392	Eulemur_rubriventer	Perry et al. 2011	Eulemur_rubriventer				Mammals	Mammals	Mammals	muscle	estimate	84.56			P	P	P	84.56	84.56			84.56	84.56						1960	1.96	Perry et al. 2011	1		1	1
393	Galago_moholi	Perry et al. 2011	Galago_moholi				Mammals	Mammals	Mammals	muscle	estimate	16.58			P	P	P	16.58	16.58			16.58	16.58						180	0.18	Perry et al. 2011	1		1	1
394	Hapalemur_griseus	Perry et al. 2011	Hapalemur_griseus				Mammals	Mammals	Mammals	muscle	estimate	62.78			P	P	P	62.78	62.78			62.78	62.78						710	0.71	Perry et al. 2011	1		1	1
395	Lemur_catta	Perry et al. 2011	Lemur_catta				Mammals	Mammals	Mammals	muscle	estimate	56.51			P	P	P	56.51	56.51			56.51	56.51						2210	2.21	Perry et al. 2011	1		1	1
396	Lepilemur_leucopus	Perry et al. 2011	Lepilemur_leucopus				Mammals	Mammals	Mammals	muscle	estimate	36.49			P	P	P	36.49	36.49			36.49	36.49						610	0.61	Perry et al. 2011	1		1	1
397	Microcebus_murinus	Perry et al. 2011	Microcebus_murinus				Mammals	Mammals	Mammals	muscle	estimate	8.83			P	P	P	8.83	8.83			8.83	8.83						120	0.12	Perry et al. 2011	1		1	0
398	Mirza_coquereli	Perry et al. 2011	Mirza_coquereli				Mammals	Mammals	Mammals	muscle	estimate	14.72			P	P	P	14.72	14.72			14.72	14.72						320	0.32	Perry et al. 2011	1		1	1
399	Nycticebus_coucang	Perry et al. 2011	Nycticebus_coucang				Mammals	Mammals	Mammals	muscle	estimate	46.99			P	P	P	46.99	46.99			46.99	46.99						650	0.65	Perry et al. 2011	1		1	1
400	Nycticebus_pygmaeus	Perry et al. 2011	Nycticebus_pygmaeus				Mammals	Mammals	Mammals	muscle	estimate	35.81			P	P	P	35.81	35.81			35.81	35.81						420	0.42	Perry et al. 2011	1		1	1
401	Otolemur_crassicaudatus	Perry et al. 2011	Otolemur_crassicaudatus				Mammals	Mammals	Mammals	muscle	estimate	114.19			P	P	P	114.19	114.19			114.19	114.19						1150	1.15	Perry et al. 2011	1		1	1
402	Perodicticus_potto	Perry et al. 2011	Perodicticus_potto				Mammals	Mammals	Mammals	muscle	estimate	36.3			P	P	P	36.3	36.3			36.3	36.3						1230	1.23	Perry et al. 2011	1		1	1
403	Propithecus_coquereli	Perry et al. 2011	Propithecus_coquereli				Mammals	Mammals	Mammals	muscle	estimate	134			P	P	P	134	134			134	134						3990	3.99	Perry et al. 2011	1		1	1
404	Propithecus_diadema	Perry et al. 2011	Propithecus_diadema				Mammals	Mammals	Mammals	muscle	estimate	211.21			P	P	P	211.21	211.21			211.21	211.21						6100	6.1	Perry et al. 2011	1		1	1
405	Propithecus_tattersalli	Perry et al. 2011	Propithecus_tattersalli				Mammals	Mammals	Mammals	muscle	estimate	228.87			P	P	P	228.87	228.87			228.87	228.87						3490	3.49	Perry et al. 2011	1		1	1
406	Varecia_rubra	Perry et al. 2011	Varecia_rubra				Mammals	Mammals	Mammals	muscle	estimate	69.55			P	P	P	69.55	69.55			69.55	69.55						3490	3.49	Perry et al. 2011	1		1	1
407	Tarsius_syrichta	Perry et al. 2011	Tarsius_syrichta				Mammals	Mammals	Mammals	muscle	estimate	20.99			P	P	P	20.99	20.99			20.99	20.99						130	0.13	Perry et al. 2011	1		1	1
408	Alouatta_guariba	Perry et al. 2011	Alouatta_fusca		Alouatta_guariba		Mammals	Mammals	Mammals	muscle	estimate	51.01			P	P	P	51.01	51.01			51.01	51.01						5540	5.54	Perry et al. 2011	1		1	0
409	Aotus_trivirgatus	Perry et al. 2011	Aotus_trivirgatus				Mammals	Mammals	Mammals	muscle	estimate	14.72			P	P	P	14.72	14.72			14.72	14.72						770	0.77	Perry et al. 2011	1		1	1
410	Ateles_geoffroyi	Perry et al. 2011	Ateles_geoffroyi				Mammals	Mammals	Mammals	muscle	estimate	76.68			P	P	P	76.68	76.68			76.68	76.68						7540	7.54	Perry et al. 2011	1		1	1
411	Callicebus_torquatus	Perry et al. 2011	Callicebus_torquatus				Mammals	Mammals	Mammals	muscle	estimate	6.77			P	P	P	6.77	6.77			6.77	6.77						1250	1.25	Perry et al. 2011	1		1	1
412	Callimico_goeldii	Perry et al. 2011	Callimico_goeldii				Mammals	Mammals	Mammals	muscle	estimate	12.16			P	P	P	12.16	12.16			12.16	12.16						480	0.48	Perry et al. 2011	1		1	1
413	Callithrix_argentata	Perry et al. 2011	Mico_argentatus		Callithrix_argentata		Mammals	Mammals	Mammals	muscle	estimate	6.08			P	P	P	6.08	6.08			6.08	6.08						350	0.35	Perry et al. 2011	1		1	1
414	Cebus_olivaceus	Perry et al. 2011	Cebus_nigrivittatus		Cebus_olivaceus		Mammals	Mammals	Mammals	muscle	estimate	60.04			P	P	P	60.04	60.04			60.04	60.04						2910	2.91	Perry et al. 2011	1		1	1
415	Saguinus_fuscicollis	Perry et al. 2011	Saguinus_fuscicollis				Mammals	Mammals	Mammals	muscle	estimate	11.28			P	P	P	11.28	11.28			11.28	11.28						350	0.35	Perry et al. 2011	1		1	1
416	Saimiri_sciureus	Perry et al. 2011	Saimiri_sciureus				Mammals	Mammals	Mammals	muscle	estimate	3.92			P	P	P	3.92	3.92			3.92	3.92						720	0.72	Perry et al. 2011	1		1	1
417	Callithrix_jacchus	Perry et al. 2011	Callithrix_jacchus				Mammals	Mammals	Mammals	muscle	estimate	6.18			P	P	P	6.18	6.18			6.18	6.18						320	0.32	Perry et al. 2011	1		1	0
418	Alouatta_guariba	Perry et al. 2011	Alouatta_fusca		Alouatta_guariba		Mammals	Mammals	Mammals	muscle	estimate	77.2			P	P	P	77.2	77.2			77.2	77.2						5540	5.54	Perry et al. 2011	1		1	1
419	Ateles_geoffroyi	Perry et al. 2011	Ateles_geoffroyi				Mammals	Mammals	Mammals	muscle	estimate	76.62			P	P	P	76.62	76.62			76.62	76.62						7540	7.54	Perry et al. 2011	1		1	0
420	Callithrix_jacchus	Perry et al. 2011	Callithrix_jacchus				Mammals	Mammals	Mammals	muscle	estimate	6.97			P	P	P	6.97	6.97			6.97	6.97						320	0.32	Perry et al. 2011	1		1	1
421	Colobus_polykomos	Perry et al. 2011	Colobus_polykomos				Mammals	Mammals	Mammals	muscle	estimate	93.39			P	P	P	93.39	93.39			93.39	93.39						9100	9.1	Perry et al. 2011	1		1	1
422	Piliocolobus_rufomitratus	Perry et al. 2011	Colobus_rufomitratus		Piliocolobus_rufomitratus		Mammals	Mammals	Mammals	muscle	estimate	108.4			P	P	P	108.4	108.4			108.4	108.4						9100	9.1	Perry et al. 2011	1		1	1
423	Saguinus_fuscicollis	Perry et al. 2011	Saguinus_fuscicollis				Mammals	Mammals	Mammals	muscle	estimate	8.93			P	P	P	8.93	8.93			8.93	8.93						350	0.35	Perry et al. 2011	1		1	0
424	Myiopsitta_monachus	Carril et al. 2015	Myiopsitta_monachus				Dinosaurs	Birds	Dinosaurs	muscle	estimate			16.74	A	A	A	16.74	16.74			16.74	16.74	46.534	25.667	20.848			120	0.12	Carril et al. 2015	1		1	1
425	Padda_oryzivora	Genbrugge et al. 2011	Padda_oryzivora				Dinosaurs	Birds	Finches	in_vivo	in_vivo			8.86	A	A	A	8.86	8.86			8.86	8.86	31.9	15.94	15.98			24.8	0.0248	Dunning 2007	1		1	0
426	Vulpes_lagopus	Wroe et al. 2005	Vulpes_lagopus				Mammals	Mammals	Mammals	dry_skull	estimate	322		178	P	A	P	322	178	397.133	219.533	397.133	219.533	138.6	80.5				8200	8.2	Wroe et al. 2005	1		1	1
427	Cuon_alpinus	Wroe et al. 2005	Cuon_alpinus				Mammals	Mammals	Mammals	dry_skull	estimate	541		314	P	A	P	541	314	667.233	387.267	667.233	387.267	176.9	107.8				16500	16.5	Wroe et al. 2005	1		1	0
428	Canis_aureus	Wroe et al. 2005	Canis_aureus				Mammals	Mammals	Mammals	dry_skull	estimate	280		165	P	A	P	280	165	345.333	203.5	345.333	203.5	135.3	81.2				7700	7.7	Wroe et al. 2005	1		1	0
429	Canis_lupus	Wroe et al. 2005	Canis_lupus				Mammals	Mammals	Mammals	dry_skull	estimate	555		313	P	A	P	555	313	684.5	386.033	684.5	386.033	180.4	99.7				17500	17.5	Wroe et al. 2005	1		1	0
430	Canis_lupus	Wroe et al. 2005	Canis_lupus				Mammals	Mammals	Mammals	dry_skull	estimate	487		235	P	A	P	487	235	600.633	289.833	600.633	289.833	159.5	94.1				12300	12.3	Wroe et al. 2005	1		1	0
431	Lycaon_pictus	Wroe et al. 2005	Lycaon_pictus				Mammals	Mammals	Mammals	dry_skull	estimate	694		428	P	A	P	694	428	855.933	527.867	855.933	527.867	185.2	131.8				18900	18.9	Wroe et al. 2005	1		1	0
432	Vulpes_vulpes	Wroe et al. 2005	Vulpes_vulpes				Mammals	Mammals	Mammals	dry_skull	estimate	304		164	P	A	P	304	164	374.933	202.267	374.933	202.267	137.9	73.5				8100	8.1	Wroe et al. 2005	1		1	0
433	Urocyon_cineroargenteus	Wroe et al. 2005	Urocyon_cineroargenteus				Mammals	Mammals	Mammals	dry_skull	estimate	198		114	P	A	P	198	114	244.2	140.6	244.2	140.6	119.1	61.4				5300	5.3	Wroe et al. 2005	1		0	0
434	Canis_latrans	Wroe et al. 2005	Canis_latrans				Mammals	Mammals	Mammals	dry_skull	estimate	554		275	P	A	P	554	275	683.267	339.167	683.267	339.167	188.5	98.6				19800	19.8	Wroe et al. 2005	1		1	1
435	Canis_lupus	Wroe et al. 2005	Canis_lupus				Mammals	Mammals	Mammals	dry_skull	estimate	1033		593	P	A	P	1033	593	1274.03	731.367	1274.03	731.367	229.2	132.2				34700	34.7	Wroe et al. 2005	1		1	0
436	Canis_dirus	Wroe et al. 2005	Canis_dirus				Mammals	Mammals	Mammals	dry_skull	estimate	1577		893	P	A	P	1577	893	1944.97	1101.37	1944.97	1101.37	261.9	175.8				50800	50.8	Wroe et al. 2005	1		0	0
437	Ursus_americanus	Wroe et al. 2005	Ursus_americanus				Mammals	Mammals	Mammals	dry_skull	estimate	758		541	P	A	P	758	541	934.867	667.233	934.867	667.233	243.9	172				105200	105.2	Wroe et al. 2005	1		1	0
438	Ursus_arctos	Wroe et al. 2005	Ursus_arctos				Mammals	Mammals	Mammals	dry_skull	estimate	1180		751	P	A	P	1180	751	1455.33	926.233	1455.33	926.233	269.6	162.8				128800	128.8	Wroe et al. 2005	1		1	0
439	Ursus_thibetanus	Wroe et al. 2005	Ursus_thibetanus				Mammals	Mammals	Mammals	dry_skull	estimate	706		312	P	A	P	706	312	870.733	384.8	870.733	384.8	209.2	110.7				77200	77.2	Wroe et al. 2005	1		1	0
440	Meles_meles	Wroe et al. 2005	Meles_meles				Mammals	Mammals	Mammals	dry_skull	estimate	349		244	P	A	P	349	244	430.433	300.933	430.433	300.933	123.1	80.5				11400	11.4	Wroe et al. 2005	1		1	0
441	Genetta_tigrina	Wroe et al. 2005	Genetta_tigrina				Mammals	Mammals	Mammals	dry_skull	estimate	265		73	P	A	P	265	73	326.833	90.0333	326.833	90.0333	109.3	51.9				6200	6.2	Wroe et al. 2005	1		1	1
442	Crocuta_crocuta	Wroe et al. 2005	Crocuta_crocuta				Mammals	Mammals	Mammals	dry_skull	estimate	1569		773	P	A	P	1569	773	1935.1	953.367	1935.1	953.367	236.4	167.3				69100	69.1	Wroe et al. 2005	1		1	0
443	Hyaena_hyaena	Wroe et al. 2005	Hyaena_hyaena				Mammals	Mammals	Mammals	dry_skull	estimate	1097		545	P	A	P	1097	545	1352.97	672.167	1352.97	672.167	199.8	151.8				40800	40.8	Wroe et al. 2005	1		1	0
444	Proteles_cristatus	Wroe et al. 2005	Proteles_cristatus				Mammals	Mammals	Mammals	dry_skull	estimate	1824		151	P	A	P	1824	151	2249.6	186.233	2249.6	186.233	124.6	72.2				9300	9.3	Wroe et al. 2005	1		1	1
445	Panthera_onca	Wroe et al. 2005	Panthera_onca				Mammals	Mammals	Mammals	dry_skull	estimate	1755		1014	P	A	P	1755	1014	2164.5	1250.6	2164.5	1250.6	222.5	186.3				83200	83.2	Wroe et al. 2005	1		1	0
446	Panthera_tigris	Wroe et al. 2005	Panthera_tigris				Mammals	Mammals	Mammals	dry_skull	estimate	2789		1525	P	A	P	2789	1525	3439.77	1880.83	3439.77	1880.83	288.6	227.3				186900	186.9	Wroe et al. 2005	1		1	0
447	Acinonyx_jubatus	Wroe et al. 2005	Acinonyx_jubatus				Mammals	Mammals	Mammals	dry_skull	estimate	736		472	P	A	P	736	472	907.733	582.133	907.733	582.133	159.3	123				29500	29.5	Wroe et al. 2005	1		1	0
448	Puma_yagouaroundi	Wroe et al. 2005	Puma_yagouaroundi				Mammals	Mammals	Mammals	dry_skull	estimate	227		127	P	A	P	227	127	279.967	156.633	279.967	156.633	100.9	69.4				7100	7.1	Wroe et al. 2005	1		1	1
449	Lynx_rufus	Wroe et al. 2005	Lynx_rufus				Mammals	Mammals	Mammals	dry_skull	estimate	162		98	P	A	P	162	98	199.8	120.867	199.8	120.867	75.8	59.3				2900	2.9	Wroe et al. 2005	1		1	0
450	Puma_concolor	Wroe et al. 2005	Puma_concolor				Mammals	Mammals	Mammals	dry_skull	estimate	864		472	P	A	P	864	472	1065.6	582.133	1065.6	582.133	167.7	129.2				34500	34.5	Wroe et al. 2005	1		1	0
451	Felis_silvestris	Wroe et al. 2005	Felis_silvestris				Mammals	Mammals	Mammals	dry_skull	estimate	105		56	P	A	P	105	56	129.5	69.0667	129.5	69.0667	75.1	53.9				2800	2.8	Wroe et al. 2005	1		1	0
452	Neofelis_nebulosa	Wroe et al. 2005	Neofelis_nebulosa				Mammals	Mammals	Mammals	dry_skull	estimate	1051		595	P	A	P	1051	595	1296.23	733.833	1296.23	733.833	167.4	118.8				34400	34.4	Wroe et al. 2005	1		1	0
453	Panthera_leo	Wroe et al. 2005	Panthera_leo				Mammals	Mammals	Mammals	dry_skull	estimate	3085		1768	P	A	P	3085	1768	3804.83	2180.53	3804.83	2180.53	334.1	248.1				294600	294.6	Wroe et al. 2005	1		1	0
454	Panthera_pardus	Wroe et al. 2005	Panthera_pardus				Mammals	Mammals	Mammals	dry_skull	estimate	837		467	P	A	P	837	467	1032.3	575.967	1032.3	575.967	180.1	130.2				43100	43.1	Wroe et al. 2005	1		1	0
455	Smilodon_fatalis	Wroe et al. 2005	Smilodon_fatalis				Mammals	Mammals	Mammals	dry_skull	estimate	1933		976	P	A	P	1933	976	2384.03	1203.73	2384.03	1203.73	294.8	195.3				199600	199.6	Wroe et al. 2005	1		1	0
456	Dasyurus_maculatus	Wroe et al. 2005	Dasyurus_maculatus				Mammals	Mammals	Mammals	dry_skull	estimate	308		153	P	A	P	308	153	379.867	188.7	379.867	188.7	100.9	60.1				3000	3	Wroe et al. 2005	1		1	1
457	Dasyurus_viverrinus	Wroe et al. 2005	Dasyurus_viverrinus				Mammals	Mammals	Mammals	dry_skull	estimate	123		65	P	A	P	123	65	151.7	80.1667	151.7	80.1667	72.7	41.5				870	0.87	Wroe et al. 2005	1		1	1
458	Sarcophilus_harrisii	Wroe et al. 2005	Sarcophilus_harrisii				Mammals	Mammals	Mammals	dry_skull	estimate	553		418	P	A	P	553	418	682.033	515.533	682.033	515.533	139.6	111.7				12000	12	Wroe et al. 2005	1		1	0
459	Nimbacinus_dicksoni	Wroe et al. 2005	Nimbacinus_dicksoni				Mammals	Mammals	Mammals	dry_skull	estimate	465		267	P	A	P	465	267	573.5	329.3	573.5	329.3	132.4	80.8				5300	5.3	Wroe et al. 2005	1		1	1
460	Thylacinus_cynocephalus	Wroe et al. 2005	Thylacinus_cynocephalus				Mammals	Mammals	Mammals	dry_skull	estimate	1176		808	P	A	P	1176	808	1450.4	996.533	1450.4	996.533	250.4	148.3				41700	41.7	Wroe et al. 2005	1		1	1
461	Priscileo_roskellyae	Wroe et al. 2005	Priscileo_roskellyae				Mammals	Mammals	Mammals	dry_skull	estimate	227		184	P	A	P	227	184	279.967	226.933	279.967	226.933	83.4	63.4				2700	2.7	Wroe et al. 2005	1		0	0
462	Wakaleo_vanderleurei	Wroe et al. 2005	Wakaleo_vanderleurei				Mammals	Mammals	Mammals	dry_skull	estimate	875		673	P	A	P	875	673	1079.17	830.033	1079.17	830.033	185.3	125.8				41400	41.4	Wroe et al. 2005	1		0	0
463	Thylacoleo_carnifex	Wroe et al. 2005	Thylacoleo_carnifex				Mammals	Mammals	Mammals	dry_skull	estimate	2102		1692	P	A	P	2102	1692	2592.47	2086.8	2592.47	2086.8	240.4	201.5				109400	109.4	Wroe et al. 2005	1		0	0
464	Thylacosmilus_atrox	Wroe et al. 2005	Thylacosmilus_atrox				Mammals	Mammals	Mammals	dry_skull	estimate	658		353	P	A	P	658	353	811.533	435.367	811.533	435.367	257.71	139.65				106000	106	Wroe et al. 2005	1		0	0
465	AMNH_105446	this study	AMNH_105446				Mammals	Mammals	Mammals	dry_skull	estimate	738.536		329.252	P	A	P	738.536	329.252	910.861	406.078	910.861	406.078	194	124				54000	54	estimated from condylobasal length	1		0	0
466	Acinonyx_jubatus	this study	Acinonyx_jubatus				Mammals	Mammals	Mammals	dry_skull	estimate	718.946		456.528	P	A	P	718.946	456.528	886.7	563.051	886.7	563.051	164	123				47000	47	Sakamoto et al. 2010	1		1	0
467	Caracal_aurata	this study	Caracal_aurata				Mammals	Mammals	Mammals	dry_skull	estimate	393.087		230.833	P	A	P	393.087	230.833	484.808	284.694	484.808	284.694	115.5	86				11000	11	Sakamoto et al. 2010	1		1	0
468	Caracal_caracal	this study	Caracal_caracal				Mammals	Mammals	Mammals	dry_skull	estimate	389.887		216.891	P	A	P	389.887	216.891	480.86	267.498	480.86	267.498	112.4	85				13000	13	Sakamoto et al. 2010	1		1	0
469	Dinofelis_cristata	this study	Dinofelis_cristata				Mammals	Mammals	Mammals	dry_skull	estimate	1623.63		852.648	P	A	P	1623.63	852.648	2002.48	1051.6	2002.48	1051.6	212	163				118000	118	estimated from molar 1 length	1		1	1
470	FAM_62192	this study	FAM_62192				Mammals	Mammals	Mammals	dry_skull	estimate	1051.25		614.206	P	A	P	1051.25	614.206	1296.54	757.521	1296.54	757.521	159.2	122.3				29000	29	estimated from condylobasal length	1		1	1
471	Felis_chaus	this study	Felis_chaus				Mammals	Mammals	Mammals	dry_skull	estimate	309.77		176.855	P	A	P	309.77	176.855	382.05	218.121	382.05	218.121	113.333	80				10000	10	Sakamoto et al. 2010	1		1	1
472	Felis_margarita	this study	Felis_margarita				Mammals	Mammals	Mammals	dry_skull	estimate	199.351		112.416	P	A	P	199.351	112.416	245.866	138.647	245.866	138.647	81	69.5				2000	2	Sakamoto et al. 2010	1		1	0
473	Felis_nigripes	this study	Felis_nigripes				Mammals	Mammals	Mammals	dry_skull	estimate	166.599		93.3214	P	A	P	166.599	93.3214	205.472	115.096	205.472	115.096	77.5	65				2000	2	Sakamoto et al. 2010	1		1	1
474	Felis_silvestris	this study	Felis_silvestris				Mammals	Mammals	Mammals	dry_skull	estimate	183.996		100.213	P	A	P	183.996	100.213	226.928	123.596	226.928	123.596	83.692	65.5				6000	6	Sakamoto et al. 2010	1		1	0
475	Homotherium_crusafonti	this study	Homotherium_crusafonti				Mammals	Mammals	Mammals	dry_skull	estimate	1357.95		710.984	P	A	P	1357.95	710.984	1674.8	876.881	1674.8	876.881	245.5	160				113000	113	estimated from condylobasal length	1		1	1
476	Homotherium_nestianus	this study	Homotherium_nestianus				Mammals	Mammals	Mammals	dry_skull	estimate	2089.06		1087.21	P	A	P	2089.06	1087.21	2576.51	1340.89	2576.51	1340.89	315	198				243000	243	estimated from molar 1 length	1		1	1
477	Hyperailurictis_validus	this study	Hyperailurictis_validus				Mammals	Mammals	Mammals	dry_skull	estimate	1498.89		872.61	P	A	P	1498.89	872.61	1848.63	1076.22	1848.63	1076.22	189	145				38000	38	estimated from molar 1 length	1		1	1
478	Leopardus_colocolo	this study	Leopardus_colocolo				Mammals	Mammals	Mammals	dry_skull	estimate	229.375		132.639	P	A	P	229.375	132.639	282.896	163.588	282.896	163.588	92	71				3000	3	Sakamoto et al. 2010	1		1	0
479	Leopardus_geoffroyi	this study	Leopardus_geoffroyi				Mammals	Mammals	Mammals	dry_skull	estimate	178.215		99.1009	P	A	P	178.215	99.1009	219.799	122.224	219.799	122.224	85.6667	61				4000	4	Sakamoto et al. 2010	1		1	0
480	Leopardus_guigna	this study	Leopardus_guigna				Mammals	Mammals	Mammals	dry_skull	estimate	125.893		71.2859	P	A	P	125.893	71.2859	155.268	87.9192	155.268	87.9192	79	53				2000	2	Sakamoto et al. 2010	1		1	0
481	Leopardus_pardalis	this study	Leopardus_pardalis				Mammals	Mammals	Mammals	dry_skull	estimate	421.201		251.014	P	A	P	421.201	251.014	519.482	309.584	519.482	309.584	125.75	90				14000	14	Sakamoto et al. 2010	1		1	0
482	Leopardus_tigrinus	this study	Leopardus_tigrinus				Mammals	Mammals	Mammals	dry_skull	estimate	148.09		88.2455	P	A	P	148.09	88.2455	182.645	108.836	182.645	108.836	82.5	59				2000	2	Sakamoto et al. 2010	1		1	0
483	Leopardus_wiedii	this study	Leopardus_wiedii				Mammals	Mammals	Mammals	dry_skull	estimate	208.083		121.012	P	A	P	208.083	121.012	256.636	149.248	256.636	149.248	92	68				3000	3	Sakamoto et al. 2010	1		1	1
484	Leptailurus_serval	this study	Leptailurus_serval				Mammals	Mammals	Mammals	dry_skull	estimate	332.204		186.135	P	A	P	332.204	186.135	409.718	229.566	409.718	229.566	110.857	80				13000	13	Sakamoto et al. 2010	1		1	0
485	Lynx_canadensis	this study	Lynx_canadensis				Mammals	Mammals	Mammals	dry_skull	estimate	368.677		206.328	P	A	P	368.677	206.328	454.701	254.471	454.701	254.471	114.25	88.5				11000	11	Sakamoto et al. 2010	1		1	1
486	Lynx_lynx	this study	Lynx_lynx				Mammals	Mammals	Mammals	dry_skull	estimate	539.313		301.772	P	A	P	539.313	301.772	665.153	372.185	665.153	372.185	131.25	102.5				23000	23	Sakamoto et al. 2010	1		1	1
487	Lynx_pardinus	this study	Lynx_pardinus				Mammals	Mammals	Mammals	dry_skull	estimate	508.893		296.318	P	A	P	508.893	296.318	627.635	365.459	627.635	365.459	NA	97				11000	11	Sakamoto et al. 2010	1		1	1
488	Lynx_rufus	this study	Lynx_rufus				Mammals	Mammals	Mammals	dry_skull	estimate	328.617		189.36	P	A	P	328.617	189.36	405.294	233.544	405.294	233.544	112	85.5				10000	10	Sakamoto et al. 2010	1		1	0
489	Megantereon_falconeri	this study	Megantereon_falconeri				Mammals	Mammals	Mammals	dry_skull	estimate	968.381		468.525	P	A	P	968.381	468.525	1194.34	577.848	1194.34	577.848	244.5	121.5				70000	70	estimated from molar 1 length	1		1	1
490	Metailurus_parvulus	this study	Metailurus_parvulus				Mammals	Mammals	Mammals	dry_skull	estimate	654.111		387.044	P	A	P	654.111	387.044	806.736	477.355	806.736	477.355	143	110				48000	48	estimated from molar 1 length	1		1	1
491	Miracinonyx_studeri	this study	Miracinonyx_studeri				Mammals	Mammals	Mammals	dry_skull	estimate	779.043		483.361	P	A	P	779.043	483.361	960.82	596.145	960.82	596.145	163	132				28000	28	estimated from molar 1 length	1		1	1
492	Neofelis_diardi	this study	Neofelis_diardi				Mammals	Mammals	Mammals	dry_skull	estimate	606.844		311.365	P	A	P	606.844	311.365	748.441	384.017	748.441	384.017	147	101				20000	20	Sakamoto et al. 2010	0	bite force estimate outlier	0	0
493	Neofelis_nebulosa	this study	Neofelis_nebulosa				Mammals	Mammals	Mammals	dry_skull	estimate	905.716		475.728	P	A	P	905.716	475.728	1117.05	586.731	1117.05	586.731	156.567	114.65				20000	20	Sakamoto et al. 2010	1		1	0
494	Otocolobus_manul	this study	Otocolobus_manul				Mammals	Mammals	Mammals	dry_skull	estimate	205.194		113.891	P	A	P	205.194	113.891	253.073	140.466	253.073	140.466	80.25	69				4000	4	Sakamoto et al. 2010	1		1	0
495	Panthera_atrox	this study	Panthera_atrox				Mammals	Mammals	Mammals	dry_skull	estimate	4080.5		2352.51	P	A	P	4080.5	2352.51	5032.62	2901.43	5032.62	2901.43	406	289				359000	359	estimated from molar 1 length	1		1	1
496	Panthera_augusta	this study	Panthera_augusta				Mammals	Mammals	Mammals	dry_skull	estimate	3462.26		2039.07	P	A	P	3462.26	2039.07	4270.12	2514.85	4270.12	2514.85	263	211				108000	108	estimated from molar 1 length	1		1	1
497	Panthera_leo	this study	Panthera_leo				Mammals	Mammals	Mammals	dry_skull	estimate	2517.96		1358.59	P	A	P	2517.96	1358.59	3105.48	1675.59	3105.48	1675.59	290.118	222				166000	166	Sakamoto et al. 2010	1		1	0
498	Panthera_onca	this study	Panthera_onca				Mammals	Mammals	Mammals	dry_skull	estimate	1642.95		1129.38	P	A	P	1642.95	1129.38	2026.3	1392.9	2026.3	1392.9	226.667	184				97000	97	Sakamoto et al. 2010	1		1	0
499	Panthera_palaeosinensis	this study	Panthera_palaeosinensis				Mammals	Mammals	Mammals	dry_skull	estimate	1344.7		779.912	P	A	P	1344.7	779.912	1658.47	961.891	1658.47	961.891	227	171.72				74000	74	estimated from molar 1 length	1		0	0
500	Panthera_pardus	this study	Panthera_pardus				Mammals	Mammals	Mammals	dry_skull	estimate	1043.51		562.163	P	A	P	1043.51	562.163	1286.99	693.335	1286.99	693.335	197.4	137.5				59000	59	Sakamoto et al. 2010	1		1	0
501	Panthera_spelaea	this study	Panthera_spelaea				Mammals	Mammals	Mammals	dry_skull	estimate	3025.7		1811.03	P	A	P	3025.7	1811.03	3731.69	2233.6	3731.69	2233.6	323	238.97				174000	174	estimated from molar 1 length	1		1	1
502	Panthera_tigris	this study	Panthera_tigris				Mammals	Mammals	Mammals	dry_skull	estimate	2717.8		1613.47	P	A	P	2717.8	1613.47	3351.96	1989.95	3351.96	1989.95	283.963	222				186000	186	Sakamoto et al. 2010	1		1	0
503	Panthera_uncia	this study	Panthera_uncia				Mammals	Mammals	Mammals	dry_skull	estimate	995.634		562.312	P	A	P	995.634	562.312	1227.95	693.518	1227.95	693.518	179.8	135				50000	50	Sakamoto et al. 2010	1		1	0
504	Pardofelis_badia	this study	Pardofelis_badia				Mammals	Mammals	Mammals	dry_skull	estimate	212.071		119.737	P	A	P	212.071	119.737	261.555	147.676	261.555	147.676	NA	65				4000	4	Sakamoto et al. 2010	1		1	1
505	Pardofelis_marmorata	this study	Pardofelis_marmorata				Mammals	Mammals	Mammals	dry_skull	estimate	225.223		128.699	P	A	P	225.223	128.699	277.775	158.729	277.775	158.729	88	70				4000	4	Sakamoto et al. 2010	1		1	0
506	Pardofelis_temminckii	this study	Pardofelis_temminckii				Mammals	Mammals	Mammals	dry_skull	estimate	459.358		267.878	P	A	P	459.358	267.878	566.541	330.383	566.541	330.383	128	91				12000	12	Sakamoto et al. 2010	1		1	0
507	Prionailurus_bengalensis	this study	Prionailurus_bengalensis				Mammals	Mammals	Mammals	dry_skull	estimate	204.576		114.342	P	A	P	204.576	114.342	252.31	141.021	252.31	141.021	88.25	63.55				5000	5	Sakamoto et al. 2010	1		1	1
508	Prionailurus_planiceps	this study	Prionailurus_planiceps				Mammals	Mammals	Mammals	dry_skull	estimate	213.411		113.94	P	A	P	213.411	113.94	263.207	140.526	263.207	140.526	90.6667	58				2000	2	Sakamoto et al. 2010	1		1	0
509	Prionailurus_rubiginosus	this study	Prionailurus_rubiginosus				Mammals	Mammals	Mammals	dry_skull	estimate	118.338		68.3263	P	A	P	118.338	68.3263	145.951	84.2691	145.951	84.2691	69	51				1000	1	Sakamoto et al. 2010	1		1	0
510	Prionailurus_viverrinus	this study	Prionailurus_viverrinus				Mammals	Mammals	Mammals	dry_skull	estimate	489.964		290.858	P	A	P	489.964	290.858	604.289	358.725	604.289	358.725	127.8	89				11000	11	Sakamoto et al. 2010	1		1	1
511	Proailurus_lemanensis	this study	Proailurus_lemanensis				Mammals	Mammals	Mammals	dry_skull	estimate	784.016		420.481	P	A	P	784.016	420.481	966.953	518.593	966.953	518.593	141	92				19000	19	estimated from molar 1 length	1		1	1
512	Puma_concolor	this study	Puma_concolor				Mammals	Mammals	Mammals	dry_skull	estimate	1323.12		783.547	P	A	P	1323.12	783.547	1631.85	966.374	1631.85	966.374	200.5	156.5				70000	70	Sakamoto et al. 2010	1		1	1
513	Puma_yagouaroundi	this study	Puma_yagouaroundi				Mammals	Mammals	Mammals	dry_skull	estimate	219.668		124.219	P	A	P	219.668	124.219	270.924	153.204	270.924	153.204	93.5	63.5				7000	7	Sakamoto et al. 2010	1		1	0
514	Smilodon_fatalis	this study	Smilodon_fatalis				Mammals	Mammals	Mammals	dry_skull	estimate	2562.29		1134.1	P	A	P	2562.29	1134.1	3160.16	1398.72	3160.16	1398.72	304.333	206				155000	155	estimated from molar 1 length	1		1	1
515	Xenosmilus_hodsonae	this study	Xenosmilus_hodsonae				Mammals	Mammals	Mammals	dry_skull	estimate	1716.4		915.046	P	A	P	1716.4	915.046	2116.89	1128.56	2116.89	1128.56	290	174				261000	261	estimated from molar 1 length	1		1	1
516	Emballonura_monticola	Senawi et al. 2015	Emballonura_monticola				Mammals	Mammals	Bats	in_vivo	in_vivo			1.06	A	A	A	1.06	1.06			1.06	1.06	16.52	9.88	9.03			6.29	0.00629	Senawi et al. 2015	1		1	1
517	Taphozous_melanopogon	Senawi et al. 2015	Taphozous_melanopogon				Mammals	Mammals	Bats	in_vivo	in_vivo			7.78	A	A	A	7.78	7.78			7.78	7.78	26.27	13.95	11.98			24.33	0.02433	Senawi et al. 2015	1		1	1
518	Hipposideros_bicolor	Senawi et al. 2015	Hipposideros_bicolor				Mammals	Mammals	Bats	in_vivo	in_vivo			3.35	A	A	A	3.35	3.35			3.35	3.35	19.39	12.18	10.38			8.73	0.00873	Senawi et al. 2015	1		1	0
519	Hipposideros_bicolor	Senawi et al. 2015	Hipposideros_bicolor				Mammals	Mammals	Bats	in_vivo	in_vivo			3.63	A	A	A	3.63	3.63			3.63	3.63	18.74	11.26	9.03			8.59	0.00859	Senawi et al. 2015	1		1	1
520	Hipposideros_cervinus	Senawi et al. 2015	Hipposideros_cervinus				Mammals	Mammals	Bats	in_vivo	in_vivo			1.61	A	A	A	1.61	1.61			1.61	1.61	16.2	10.8	8.1			4.75	0.00475	Senawi et al. 2015	1		1	1
521	Hipposideros_diadema	Senawi et al. 2015	Hipposideros_diadema				Mammals	Mammals	Bats	in_vivo	in_vivo			24.81	A	A	A	24.81	24.81			24.81	24.81	33.61	20.8	18.11			47.68	0.04768	Senawi et al. 2015	1		1	1
522	Hipposideros_galeritus	Senawi et al. 2015	Hipposideros_galeritus				Mammals	Mammals	Bats	in_vivo	in_vivo			1.13	A	A	A	1.13	1.13			1.13	1.13	18.1	9.71	9.79			6.88	0.00688	Senawi et al. 2015	1		1	1
523	Hipposideros_larvatus	Senawi et al. 2015	Hipposideros_larvatus				Mammals	Mammals	Bats	in_vivo	in_vivo			9.4	A	A	A	9.4	9.4			9.4	9.4	23.74	13.51	11.35			17.66	0.01766	Senawi et al. 2015	1		1	1
524	Hipposideros_lylei	Senawi et al. 2015	Hipposideros_lylei				Mammals	Mammals	Bats	in_vivo	in_vivo			16.31	A	A	A	16.31	16.31			16.31	16.31	31.5	17.68	17.62			38.3	0.0383	Senawi et al. 2015	1		1	1
525	Hipposideros_ridleyi	Senawi et al. 2015	Hipposideros_ridleyi				Mammals	Mammals	Bats	in_vivo	in_vivo			3.74	A	A	A	3.74	3.74			3.74	3.74	20.73	11.83	10.33			9.6	0.0096	Senawi et al. 2015	1		1	1
526	Chaerephon_johorensis	Senawi et al. 2015	Chaerephon_johorensis				Mammals	Mammals	Bats	in_vivo	in_vivo			4.45	A	A	A	4.45	4.45			4.45	4.45	24.82	14.82	12.82			19.77	0.01977	Senawi et al. 2015	1		0	0
527	Cheiromeles_torquatus	Senawi et al. 2015	Cheiromeles_torquatus				Mammals	Mammals	Bats	in_vivo	in_vivo			16.41	A	A	A	16.41	16.41			16.41	16.41	44.3	34.88	29.85			190.5	0.1905	Senawi et al. 2015	1		0	0
528	Mops_mops	Senawi et al. 2015	Mops_mops				Mammals	Mammals	Bats	in_vivo	in_vivo			7.06	A	A	A	7.06	7.06			7.06	7.06	26.78	26.23	14.08			26.93	0.02693	Senawi et al. 2015	1		1	1
529	Miniopterus_medius	Senawi et al. 2015	Miniopterus_medius				Mammals	Mammals	Bats	in_vivo	in_vivo			1.32	A	A	A	1.32	1.32			1.32	1.32	16.26	10.09	9.87			8.54	0.00854	Senawi et al. 2015	1		0	0
530	Nycteris_tragata	Senawi et al. 2015	Nycteris_tragata				Mammals	Mammals	Bats	in_vivo	in_vivo			9.43	A	A	A	9.43	9.43			9.43	9.43	23.9	15.7	11.98			19.94	0.01994	Senawi et al. 2015	1		1	1
531	Rhinolophus_affinis	Senawi et al. 2015	Rhinolophus_affinis				Mammals	Mammals	Bats	in_vivo	in_vivo			4.35	A	A	A	4.35	4.35			4.35	4.35	23.84	13.39	11.96			13.95	0.01395	Senawi et al. 2015	1		1	1
532	Rhinolophus_lepidus	Senawi et al. 2015	Rhinolophus_lepidus				Mammals	Mammals	Bats	in_vivo	in_vivo			1.77	A	A	A	1.77	1.77			1.77	1.77	18.02	10.35	8.93			6.36	0.00636	Senawi et al. 2015	1		1	1
533	Rhinolophus_luctus	Senawi et al. 2015	Rhinolophus_luctus				Mammals	Mammals	Bats	in_vivo	in_vivo			18.19	A	A	A	18.19	18.19			18.19	18.19	30.25	15.55	13.9			28	0.028	Senawi et al. 2015	1		1	1
534	Rhinolophus_robinsoni	Senawi et al. 2015	Rhinolophus_robinsoni				Mammals	Mammals	Bats	in_vivo	in_vivo			2.21	A	A	A	2.21	2.21			2.21	2.21	20.9	12.5	10.2			8	0.008	Senawi et al. 2015	1		1	1
535	Rhinolophus_sedulus	Senawi et al. 2015	Rhinolophus_sedulus				Mammals	Mammals	Bats	in_vivo	in_vivo			3.19	A	A	A	3.19	3.19			3.19	3.19	20.3	11.05	9.15			7.63	0.00763	Senawi et al. 2015	1		1	1
536	Rhinolophus_stheno	Senawi et al. 2015	Rhinolophus_stheno				Mammals	Mammals	Bats	in_vivo	in_vivo			2.85	A	A	A	2.85	2.85			2.85	2.85	20.99	10.93	9.54			8.81	0.00881	Senawi et al. 2015	1		1	1
537	Rhinolophus_trifoliatus	Senawi et al. 2015	Rhinolophus_trifoliatus				Mammals	Mammals	Bats	in_vivo	in_vivo			6.66	A	A	A	6.66	6.66			6.66	6.66	23.68	12.92	11.4			14.01	0.01401	Senawi et al. 2015	1		1	1
538	Kerivoula_intermedia	Senawi et al. 2015	Kerivoula_intermedia				Mammals	Mammals	Bats	in_vivo	in_vivo			0.91	A	A	A	0.91	0.91			0.91	0.91	13.54	8.09	7.36			3.16	0.00316	Senawi et al. 2015	1		1	1
539	Kerivoula_krauensis	Senawi et al. 2015	Kerivoula_krauensis				Mammals	Mammals	Bats	in_vivo	in_vivo			1.99	A	A	A	1.99	1.99			1.99	1.99	14	9.2	8.5			3.5	0.0035	Senawi et al. 2015	1		0	0
540	Kerivoula_papillosa	Senawi et al. 2015	Kerivoula_papillosa				Mammals	Mammals	Bats	in_vivo	in_vivo			7.38	A	A	A	7.38	7.38			7.38	7.38	19.29	12.01	11.39			9.05	0.00905	Senawi et al. 2015	1		1	1
541	Kerivoula_pellucida	Senawi et al. 2015	Kerivoula_pellucida				Mammals	Mammals	Bats	in_vivo	in_vivo			1.84	A	A	A	1.84	1.84			1.84	1.84	15.55	9.5	9.02			4.73	0.00473	Senawi et al. 2015	1		1	1
542	Phoniscus_atrox	Senawi et al. 2015	Phoniscus_atrox				Mammals	Mammals	Bats	in_vivo	in_vivo			2.6	A	A	A	2.6	2.6			2.6	2.6	17.38	9.79	9.91			4.87	0.00487	Senawi et al. 2015	1		0	0
543	Phoniscus_jagorii	Senawi et al. 2015	Phoniscus_jagorii				Mammals	Mammals	Bats	in_vivo	in_vivo			6.42	A	A	A	6.42	6.42			6.42	6.42	19.8	13.2	10.8			9.5	0.0095	Senawi et al. 2015	1		1	1
544	Murina_aenea	Senawi et al. 2015	Murina_aenea				Mammals	Mammals	Bats	in_vivo	in_vivo			12.52	A	A	A	12.52	12.52			12.52	12.52	18.6	10.85	10.85			7.75	0.00775	Senawi et al. 2015	1		1	1
545	Murina_cyclotis	Senawi et al. 2015	Murina_cyclotis				Mammals	Mammals	Bats	in_vivo	in_vivo			11.9	A	A	A	11.9	11.9			11.9	11.9	19.56	11.77	11.2			8.45	0.00845	Senawi et al. 2015	1		1	1
546	Murina_suilla	Senawi et al. 2015	Murina_suilla				Mammals	Mammals	Bats	in_vivo	in_vivo			4.41	A	A	A	4.41	4.41			4.41	4.41	15.86	8.9	8.8			3.99	0.00399	Senawi et al. 2015	1		1	1
547	Myotis_ater	Senawi et al. 2015	Myotis_ater				Mammals	Mammals	Bats	in_vivo	in_vivo			2.44	A	A	A	2.44	2.44			2.44	2.44	17.6	11.2	9.85			6.5	0.0065	Senawi et al. 2015	1		1	1
548	Myotis_ridleyi	Senawi et al. 2015	Myotis_ridleyi				Mammals	Mammals	Bats	in_vivo	in_vivo			1.38	A	A	A	1.38	1.38			1.38	1.38	13.6	8.9	7.2			5.5	0.0055	Senawi et al. 2015	1		1	1
549	Scotophilus_kuhlii	Senawi et al. 2015	Scotophilus_kuhlii				Mammals	Mammals	Bats	in_vivo	in_vivo			9.18	A	A	A	9.18	9.18			9.18	9.18	23.44	14.86	13.04			24.6	0.0246	Senawi et al. 2015	1		1	1
550	Geranoaetus_melanoleucus	Degrange et al. 2010	Geranoaetus_melanoleucus				Dinosaurs	Birds	Dinosaurs	in_vivo	in_vivo			50	A	A	A	50	50			50	50	105	58	38			3100	3.1	Degrange et al. 2010	1		1	1
551	Cariama_cristata	Degrange et al. 2010	Cariama_cristata				Dinosaurs	Birds	Dinosaurs	in_vivo	in_vivo			19.42	A	A	A	19.42	19.42			19.42	19.42	117	42	32			1500	1.5	Degrange et al. 2010	1		1	1
552	Rhea_americana	Degrange et al. 2010	Rhea_americana				Dinosaurs	Birds	Dinosaurs	?	NA			30.095	A	A	A	30.095	30.095			30.095	30.095						12500	12.5	Degrange et al. 2010	0	methodology unclear	0	0
553	Sarcoramphus_papa	Degrange et al. 2010	Sarcoramphus_papa				Dinosaurs	Birds	Dinosaurs	?	NA			69	A	A	A	69	69			69	69						3375	3.375	Degrange et al. 2010	0	methodology unclear	0	0
554	Chunga_burmeisteri	Degrange et al. 2010	Chunga_burmeisteri				Dinosaurs	Birds	Dinosaurs	?	NA			19.42	A	A	A	19.42	19.42			19.42	19.42						1300	1.3	Degrange et al. 2010	0	methodology unclear	0	0
555	Homo_sapiens	Eng et al. 2013	Homo_sapiens				Mammals	Mammals	Mammals	dry_skull	estimate	825.75			P	P	P	825.75	825.75			825.75	825.75						58540.6	58.5406	Jones et al. 2009	0	Taxon mean: M/F data available	0	0
556	Homo_sapiens	Eng et al. 2013	Homo_sapiens				Mammals	Mammals	Mammals	dry_skull	estimate	789.22			P	P	P	789.22	789.22			789.22	789.22					M	58540.6	58.5406	Jones et al. 2009	1		1	0
557	Homo_sapiens	Eng et al. 2013	Homo_sapiens				Mammals	Mammals	Mammals	dry_skull	estimate	869.57			P	P	P	869.57	869.57			869.57	869.57					F	58540.6	58.5406	Jones et al. 2009	1		1	0
558	Homo_sapiens	Eng et al. 2013	Homo_sapiens			Pleistocene	Mammals	Mammals	Mammals	dry_skull	estimate	754.72			P	P	P	754.72	754.72			754.72	754.72						58540.6	58.5406	Jones et al. 2009	1		1	0
559	Homo_habilis	Eng et al. 2013	Homo_habilis				Mammals	Mammals	Mammals	dry_skull	estimate	790.58			P	P	P	790.58	790.58			790.58	790.58						32600	32.6	Grabowski et al. 2015	1		1	1
560	Homo_heidelbergensis	Eng et al. 2013	Homo_heidelbergensis			Kabwe + Mauer, Petralona 1 + Mauer, Atapuerca 5	Mammals	Mammals	Mammals	dry_skull	estimate	582.34			P	P	P	582.34	582.34			582.34	582.34						51930	51.93	Rightmire 2004	1		1	1
561	Homo_erectus	Eng et al. 2013	Homo_erectus				Mammals	Mammals	Mammals	dry_skull	estimate	753.45			P	P	P	753.45	753.45			753.45	753.45						51400	51.4	Grabowski et al. 2015	1		1	0
562	Homo_neanderthalensis	Eng et al. 2013	Homo_neanderthalensis				Mammals	Mammals	Mammals	dry_skull	estimate	738.52			P	P	P	738.52	738.52			738.52	738.52						68400	68.4	Froehle and Churchill 2009	1		1	1
563	Australopithecus_afarensis	Eng et al. 2013	Australopithecus_afarensis				Mammals	Mammals	Mammals	dry_skull	estimate	2989.65			P	P	P	2989.65	2989.65			2989.65	2989.65						39100	39.1	Grabowski et al. 2015	1		1	1
564	Australopithecus_africanus	Eng et al. 2013	Australopithecus_africanus				Mammals	Mammals	Mammals	dry_skull	estimate	1681.57			P	P	P	1681.57	1681.57			1681.57	1681.57						30500	30.5	Grabowski et al. 2015	1		1	1
565	Paranthropus_boisei	Eng et al. 2013	Paranthropus_bosisei		Paranthropus_boisei		Mammals	Mammals	Mammals	dry_skull	estimate	3716.82			P	P	P	3716.82	3716.82			3716.82	3716.82						35300	35.3	Grabowski et al. 2015	1		1	1
566	Pan_troglodytes	Eng et al. 2013	Pan_troglodytes				Mammals	Mammals	Mammals	dry_skull	estimate	1780.18			P	P	P	1780.18	1780.18			1780.18	1780.18						45000	45	Jones et al. 2009	0	Taxon mean: M/F data available	0	0
567	Pan_troglodytes	Eng et al. 2013	Pan_troglodytes				Mammals	Mammals	Mammals	dry_skull	estimate	1928.6			P	P	P	1928.6	1928.6			1928.6	1928.6					M	45000	45	Jones et al. 2009	1		1	1
568	Pan_troglodytes	Eng et al. 2013	Pan_troglodytes				Mammals	Mammals	Mammals	dry_skull	estimate	1631.76			P	P	P	1631.76	1631.76			1631.76	1631.76					F	45000	45	Jones et al. 2009	1		1	0
569	Pan_paniscus	Eng et al. 2013	Pan_paniscus				Mammals	Mammals	Mammals	dry_skull	estimate	1244.65			P	P	P	1244.65	1244.65			1244.65	1244.65						35119.9	35.12	Jones et al. 2009	0	Taxon mean: M/F data available	0	0
570	Pan_paniscus	Eng et al. 2013	Pan_paniscus				Mammals	Mammals	Mammals	dry_skull	estimate	1379.66			P	P	P	1379.66	1379.66			1379.66	1379.66					M	35119.9	35.12	Jones et al. 2009	1		1	1
571	Pan_paniscus	Eng et al. 2013	Pan_paniscus				Mammals	Mammals	Mammals	dry_skull	estimate	1109.65			P	P	P	1109.65	1109.65			1109.65	1109.65					F	35119.9	35.12	Jones et al. 2009	1		1	0
572	Gorilla_gorilla	Eng et al. 2013	Gorilla_gorilla				Mammals	Mammals	Mammals	dry_skull	estimate	3420.1			P	P	P	3420.1	3420.1			3420.1	3420.1						112589	112.589	Jones et al. 2009	0	Taxon mean: M/F data available	0	0
573	Gorilla_gorilla	Eng et al. 2013	Gorilla_gorilla				Mammals	Mammals	Mammals	dry_skull	estimate	4067.33			P	P	P	4067.33	4067.33			4067.33	4067.33					M	112589	112.589	Jones et al. 2009	1		1	1
574	Gorilla_gorilla	Eng et al. 2013	Gorilla_gorilla				Mammals	Mammals	Mammals	dry_skull	estimate	2772.86			P	P	P	2772.86	2772.86			2772.86	2772.86					F	112589	112.589	Jones et al. 2009	1		1	0
575	Pongo_pygmaeus	Eng et al. 2013	Pongo_pygmaeus				Mammals	Mammals	Mammals	dry_skull	estimate	2559.69			P	P	P	2559.69	2559.69			2559.69	2559.69						53408.3	53.4083	Jones et al. 2009	0	Taxon mean: M/F data available	0	0
576	Pongo_pygmaeus	Eng et al. 2013	Pongo_pygmaeus				Mammals	Mammals	Mammals	dry_skull	estimate	2978.83			P	P	P	2978.83	2978.83			2978.83	2978.83					M	53408.3	53.4083	Jones et al. 2009	1		1	1
577	Pongo_pygmaeus	Eng et al. 2013	Pongo_pygmaeus				Mammals	Mammals	Mammals	dry_skull	estimate	1930.99			P	P	P	1930.99	1930.99			1930.99	1930.99					F	53408.3	53.4083	Jones et al. 2009	1		1	0
578	Hylobates_lar	Eng et al. 2013	Hylobates_lar				Mammals	Mammals	Mammals	dry_skull	estimate	578.19			P	P	P	578.19	578.19			578.19	578.19						5578.61	5.57861	Jones et al. 2009	0	Taxon mean: M/F data available	0	0
579	Hylobates_lar	Eng et al. 2013	Hylobates_lar				Mammals	Mammals	Mammals	dry_skull	estimate	618.9			P	P	P	618.9	618.9			618.9	618.9					M	5578.61	5.57861	Jones et al. 2009	1		1	1
580	Hylobates_lar	Eng et al. 2013	Hylobates_lar				Mammals	Mammals	Mammals	dry_skull	estimate	537.48			P	P	P	537.48	537.48			537.48	537.48					F	5578.61	5.57861	Jones et al. 2009	1		1	0
581	Macaca_fascicularis	Eng et al. 2013	Macaca_fascicularis				Mammals	Mammals	Mammals	dry_skull	estimate	806.93			P	P	P	806.93	806.93			806.93	806.93						4569.32	4.56932	Jones et al. 2009	0	Taxon mean: M/F data available	0	0
582	Macaca_fascicularis	Eng et al. 2013	Macaca_fascicularis				Mammals	Mammals	Mammals	dry_skull	estimate	898.42			P	P	P	898.42	898.42			898.42	898.42					M	4569.32	4.56932	Jones et al. 2009	1		1	1
583	Macaca_fascicularis	Eng et al. 2013	Macaca_fascicularis				Mammals	Mammals	Mammals	dry_skull	estimate	715.45			P	P	P	715.45	715.45			715.45	715.45					F	4569.32	4.56932	Jones et al. 2009	1		1	0
584	Gorilla_gorilla	Demes and Creel 1988	Gorilla_gorilla				Mammals	Mammals	Mammals	dry_skull	estimate	13	7.5		P	P	P	13	13	910	910	910	910					F	112589	112.589	Jones et al. 2009	1		1	0
585	Gorilla_gorilla	Demes and Creel 1988	Gorilla_gorilla				Mammals	Mammals	Mammals	dry_skull	estimate	18.3	11.3		P	P	P	18.3	18.3	1281	1281	1281	1281					M	112589	112.589	Jones et al. 2009	1		1	0
586	Pongo_pygmaeus	Demes and Creel 1988	Pongo_pygmaeus				Mammals	Mammals	Mammals	dry_skull	estimate	9.5	5.8		P	P	P	9.5	9.5	665	665	665	665					F	53408.3	53.4083	Jones et al. 2009	1		1	0
587	Pongo_pygmaeus	Demes and Creel 1988	Pongo_pygmaeus				Mammals	Mammals	Mammals	dry_skull	estimate	14.4	9.4		P	P	P	14.4	14.4	1008	1008	1008	1008					M	53408.3	53.4083	Jones et al. 2009	1		1	0
588	Pan_troglodytes	Demes and Creel 1988	Pan_troglodytes				Mammals	Mammals	Mammals	dry_skull	estimate	8.7	5.1		P	P	P	8.7	8.7	609	609	609	609					F	45000	45	Jones et al. 2009	1		1	0
589	Pan_troglodytes	Demes and Creel 1988	Pan_troglodytes				Mammals	Mammals	Mammals	dry_skull	estimate	13.1	8		P	P	P	13.1	13.1	917	917	917	917					M	45000	45	Jones et al. 2009	1		1	0
590	Pan_paniscus	Demes and Creel 1988	Pan_paniscus				Mammals	Mammals	Mammals	dry_skull	estimate	6.7	3.8		P	P	P	6.7	6.7	469	469	469	469					F	35119.9	35.12	Jones et al. 2009	1		1	0
591	Pan_paniscus	Demes and Creel 1988	Pan_paniscus				Mammals	Mammals	Mammals	dry_skull	estimate	6.6	4.1		P	P	P	6.6	6.6	462	462	462	462					M	35119.9	35.12	Jones et al. 2009	1		1	0
592	Symphalangus_syndactylus	Demes and Creel 1988	Symphalangus_syndactylus				Mammals	Mammals	Mammals	dry_skull	estimate	4.8	2.8		P	P	P	4.8	4.8	336	336	336	336					F	10839	10.839	Jones et al. 2009	1		1	0
593	Symphalangus_syndactylus	Demes and Creel 1988	Symphalangus_syndactylus				Mammals	Mammals	Mammals	dry_skull	estimate	6.3	3.8		P	P	P	6.3	6.3	441	441	441	441					M	10839	10.839	Jones et al. 2009	1		1	1
594	Hylobates_lar	Demes and Creel 1988	Hylobates_lar				Mammals	Mammals	Mammals	dry_skull	estimate	2.3	1.4		P	P	P	2.3	2.3	161	161	161	161					F	5578.61	5.57861	Jones et al. 2009	1		1	0
595	Hylobates_lar	Demes and Creel 1988	Hylobates_lar				Mammals	Mammals	Mammals	dry_skull	estimate	3.3	2.1		P	P	P	3.3	3.3	231	231	231	231					M	5578.61	5.57861	Jones et al. 2009	1		1	0
596	Homo_sapiens	Demes and Creel 1988	Homo_sapiens				Mammals	Mammals	Mammals	dry_skull	estimate	5.6	3.5		P	P	P	5.6	5.6	392	392	392	392					F	58540.6	58.5406	Jones et al. 2009	1		1	0
597	Homo_sapiens	Demes and Creel 1988	Homo_sapiens				Mammals	Mammals	Mammals	dry_skull	estimate	7.9	5.1		P	P	P	7.9	7.9	553	553	553	553					M	58540.6	58.5406	Jones et al. 2009	1		1	0
598	Macaca_fascicularis	Demes and Creel 1988	Macaca_fascicularis				Mammals	Mammals	Mammals	dry_skull	estimate	2.6			P	P	P	2.6	2.6	182	182	182	182						4569.32	4.56932	Jones et al. 2009	1		1	0
599	Australopithecus_afarensis	Demes and Creel 1988	Australopithecus_afarensis			composite	Mammals	Mammals	Mammals	dry_skull	estimate	13.9	9.2		P	P	P	13.9	13.9	973	973	973	973						39100	39.1	Grabowski et al. 2015	1		1	0
600	Australopithecus_africanus	Demes and Creel 1988	Australopithecus_africanus			Sts 5	Mammals	Mammals	Mammals	dry_skull	estimate	7.8	5.3		P	P	P	7.8	7.8	546	546	546	546						30500	30.5	Grabowski et al. 2015	1		1	0
601	Paranthropus_robustus	Demes and Creel 1988	Paranthropus_robustus			Sk 48	Mammals	Mammals	Mammals	dry_skull	estimate	12.2	9		P	P	P	12.2	12.2	854	854	854	854						30100	30.1	Grabowski et al. 2015	1		1	0
602	Paranthropus_boisei	Demes and Creel 1988	Paranthropus_bosisei		Paranthropus_boisei	OH 5	Mammals	Mammals	Mammals	dry_skull	estimate	22.1	13.9		P	P	P	22.1	22.1	1547	1547	1547	1547						35300	35.3	Grabowski et al. 2015	1		1	0
603	Paranthropus_boisei	Demes and Creel 1988	Paranthropus_bosisei		Paranthropus_boisei	ER 406	Mammals	Mammals	Mammals	dry_skull	estimate	18	12		P	P	P	18	18	1260	1260	1260	1260						35300	35.3	Grabowski et al. 2015	1		1	0
604	Homo_habilis	Demes and Creel 1988	Homo_habilis			ER 1813	Mammals	Mammals	Mammals	dry_skull	estimate	6.6	4.2		P	P	P	6.6	6.6	462	462	462	462						32600	32.6	Grabowski et al. 2015	1		1	0
605	Homo_habilis	Demes and Creel 1988	Homo_habilis			OH 24	Mammals	Mammals	Mammals	dry_skull	estimate	8.9	5.3		P	P	P	8.9	8.9	623	623	623	623						32600	32.6	Grabowski et al. 2015	1		1	0
606	Homo_ergaster	Demes and Creel 1988	Homo_ergaster			ER 3733	Mammals	Mammals	Mammals	dry_skull	estimate	8.4	4.7		P	P	P	8.4	8.4	588	588	588	588						50000	50	Grabowski et al. 2015	1		1	1
607	Homo_erectus	Demes and Creel 1988	Homo_erectus			SAN 17	Mammals	Mammals	Mammals	dry_skull	estimate	12.1	8		P	P	P	12.1	12.1	847	847	847	847						51400	51.4	Grabowski et al. 2015	1		1	0
608	Paranthropus_boisei	Constantino et al. 2010	Paranthropus_bosisei		Paranthropus_boisei		Mammals	Mammals	Mammals	tooth_fracture	estimate	3471			P	P	P	3471	3471			3471	3471						35300	35.3	Grabowski et al. 2015	1		1	0
609	Paranthropus_robustus	Constantino et al. 2010	Paranthropus_robustus				Mammals	Mammals	Mammals	tooth_fracture	estimate	1742			P	P	P	1742	1742			1742	1742						30100	30.1	Grabowski et al. 2015	1		1	1
610	Australopithecus_africanus	Constantino et al. 2010	Australopithecus_africanus				Mammals	Mammals	Mammals	tooth_fracture	estimate	1253			P	P	P	1253	1253			1253	1253						30500	30.5	Grabowski et al. 2015	1		1	0
611	Australopithecus_afarensis	Constantino et al. 2010	Australopithecus_afarensis				Mammals	Mammals	Mammals	tooth_fracture	estimate	1860			P	P	P	1860	1860			1860	1860						39100	39.1	Grabowski et al. 2015	1		1	0
612	Australopithecus_anamensis	Constantino et al. 2010	Australopithecus_anamensis				Mammals	Mammals	Mammals	tooth_fracture	estimate	1671			P	P	P	1671	1671			1671	1671						46300	46.3	Grabowski et al. 2015	1		1	1
613	Homo_erectus	Constantino et al. 2010	Homo_erectus				Mammals	Mammals	Mammals	tooth_fracture	estimate	1085			P	P	P	1085	1085			1085	1085						51400	51.4	Grabowski et al. 2015	1		1	1
614	Gorilla_spp	Constantino et al. 2010	Gorilla_spp				Mammals	Mammals	Mammals	tooth_fracture	estimate	1693			P	P	P	1693	1693			1693	1693						130957	130.957	Jones et al. 2009	0	Species indeterminate	0	0
615	Tayassu_pecari	Constantino et al. 2010	Tayassu_pecari				Mammals	Mammals	Mammals	tooth_fracture	estimate	2024			P	P	P	2024	2024			2024	2024						31798.7	31.7987	Jones et al. 2009	1		1	1
616	Pongo_spp	Constantino et al. 2010	Pongo_spp				Mammals	Mammals	Mammals	tooth_fracture	estimate	2036			P	P	P	2036	2036			2036	2036						46552.2	46.5522	Jones et al. 2009	0	Species indeterminate	0	0
617	Pan_troglodytes	Constantino et al. 2010	Pan_troglodytes				Mammals	Mammals	Mammals	tooth_fracture	estimate	1086			P	P	P	1086	1086			1086	1086						45000	45	Jones et al. 2009	1		1	0
618	Homo_sapiens	Constantino et al. 2010	Homo_sapiens				Mammals	Mammals	Mammals	tooth_fracture	estimate	970			P	P	P	970	970			970	970						58540.6	58.5406	Jones et al. 2009	1		1	0
619	Macaca_spp	Constantino et al. 2010	Macaca_spp				Mammals	Mammals	Mammals	tooth_fracture	estimate	624			P	P	P	624	624			624	624						7193.83	7.19383	Jones et al. 2009	0	Species indeterminate	0	0
620	Lophocebus_albigena	Constantino et al. 2010	Lophocebus_albigena				Mammals	Mammals	Mammals	tooth_fracture	estimate	601			P	P	P	601	601			601	601						7418.71	7.41871	Jones et al. 2009	1		1	1
621	Tyrannosaurus_rex	Bates and Falkingham 2012	Tyrannosaurus_rex			BHI 3033	Dinosaurs	Dinosaurs	Dinosaurs	MDA	estimate	57158	31086		P	M	P	57158	31086			57158	31086	1426	780				8385000	8385	Hutchinson et al. 2011	1		1	1
622	Tyrannosaurus_rex	Bates and Falkingham 2012	Tyrannosaurus_rex			BMRP 2002.4.1	Dinosaurs	Dinosaurs	Dinosaurs	MDA	estimate	4012	2450		P	M	P	4012	2450			4012	2450									0	juvenile	0	0
623	Allosaurus_fragilis	Bates and Falkingham 2012	Allosaurus_fragilis			SMA 0005	Dinosaurs	Dinosaurs	Dinosaurs	MDA	estimate	8724	5345		P	M	P	8724	5345			8724	5345	725.702	298				1092000	1092	Henderson and Snively 2004	1		1	0
624	Erlikosaurus_andrewsi	Lautenschlager 2012	Erlikosaurus_andrewsi				Dinosaurs	Dinosaurs	Dinosaurs	dry_skull	estimate	134	112	90	P	M	P	134	112	268	224	268	224	265	100				400000	400	Lautenschlager 2012	1		1	1
625	Stegosaurus_stenops	Reichel 2010	Stegosaurus_stenops				Dinosaurs	Dinosaurs	Dinosaurs	dry_skull	estimate	275	183.7	140.1	P	M	P	275	183.7	550	367.4	550	367.4	435	173				2530000	2530	Henderson 1999	1		1	0
626	Carnotaurus_sastrei	Mazzetta et al. 2009	Carnotaurus_sastrei				Dinosaurs	Dinosaurs	Dinosaurs	dry_skull	estimate	3341	2485	1959	P	M	P	3341	2485	5274	3922.74	5274	3922.74	600	300				1500000	1500	Mazzetta et al. 2009	1		1	1
627	Archaeopteryx_lithographica	this study	Archaeopteryx_lithographica				Dinosaurs	Birds	Dinosaurs	dry_skull	estimate	3.0905	2.07006	1.73916	P	M	P	3.0905	2.07006			3.0905	2.07006	40	15				376	0.376	Foth et al. 2014	1		1	1
628	Dromaeosaurus_albertensis	this study	Dromaeosaurus_albertensis				Dinosaurs	Dinosaurs	Dinosaurs	dry_skull	estimate	885.322	560.149	442.661	P	M	P	885.322	560.149			885.322	560.149	229	103				15000	15	Paul 1988	1		1	1
629	Tyrannosaurus_rex	this study	Tyrannosaurus_rex			BHI 3033	Dinosaurs	Dinosaurs	Dinosaurs	dry_skull	estimate	45379.5	29817	23779.8	P	M	P	45379.5	29817			45379.5	29817	1426	780				8385000	8385	Hutchinson et al. 2011	1		1	0
630	Tyrannosaurus_rex	this study	Tyrannosaurus_rex			AMNH5027	Dinosaurs	Dinosaurs	Dinosaurs	dry_skull	estimate	48505.1	31870.7	25417.7	P	M	P	48505.1	31870.7			48505.1	31870.7	1411	900				8385000	8385	Hutchinson et al. 2011	1		1	0
631	Allosaurus_fragilis	this study	Allosaurus_fragilis			Madsen1976	Dinosaurs	Dinosaurs	Dinosaurs	dry_skull	estimate	9388.65	5962.44	4439.99	P	M	P	9388.65	5962.44			9388.65	5962.44	773.461	300				1092000	1092	Henderson and Snively 2004	1		1	1
632	Majungasaurus_crenatissimus	this study	Majungasaurus_crenatissimus			FMNH.PR2100	Dinosaurs	Dinosaurs	Dinosaurs	dry_skull	estimate	7844.96	4117.95	3140.41	P	M	P	7844.96	4117.95			7844.96	4117.95	588	300				1130000	1130	Sampson and Witmer 2007	1		1	1
633	Tarbosaurus_bataar	this study	Tarbosaurus_bataar				Dinosaurs	Dinosaurs	Dinosaurs	dry_skull	estimate	24252.7	14887.3	13297.8	P	M	P	24252.7	14887.3			24252.7	14887.3	1258	616				2300000	2345.11	Benson et al. 2014	1		1	1
634	Sinraptor_dongi	this study	Sinraptor_dongi				Dinosaurs	Dinosaurs	Dinosaurs	dry_skull	estimate	10845.1	7150.83	5064.11	P	M	P	10845.1	7150.83			10845.1	7150.83	886	384				1200000	1162.46	Benson et al. 2014	1		1	1
635	Sphenodon_punctatus	Herrel et al. 2010	Sphenodon_punctatus				Reptiles	Reptiles	Reptiles	in_vivo	in_vivo	173			P	P	P	173	173			173	173	60.6	45.2	33.4	230.2	M	434.8	0.4348	Herrel et al. 2010	1		1	0
636	Sphenodon_punctatus	Herrel et al. 2010	Sphenodon_punctatus				Reptiles	Reptiles	Reptiles	in_vivo	in_vivo	120.3			P	P	P	120.3	120.3			120.3	120.3	51.3	37.9	27.9	199.5	F	272.7	0.2727	Herrel et al. 2010	1		1	0
637	Stegosaurus_stenops	Lautenschlager et al. 2016	Stegosaurus_stenops			NHMUK PV R36730	Dinosaurs	Dinosaurs	Dinosaurs	MDA	estimate	410	349	231	P	P	P	410	410	820	820	820	820	375	153				2530000	2530	Lautenschlager et al. 2016	1		1	0
638	Plateosaurus_engelhardti	Lautenschlager et al. 2016	Plateosaurus_engelhardti			MB.R.1937	Dinosaurs	Dinosaurs	Dinosaurs	MDA	estimate	138	74	69	P	P	P	138	138	276	276	276	276	350	123				917470	917.47	Lautenschlager et al. 2016	1		1	0
639	Erlikosaurus_andrewsi	Lautenschlager et al. 2016	Erlikosaurus_andrewsi			IGM 100/111	Dinosaurs	Dinosaurs	Dinosaurs	MDA	estimate	121	94	50	P	P	P	121	121	242	242	242	242	265	100				400000	400	Lautenschlager et al. 2016	1		1	0
640	Stegosaurus_stenops	Lautenschlager et al. 2016	Stegosaurus_stenops			NHMUK PV R36730	Dinosaurs	Dinosaurs	Dinosaurs	FE	estimate	357	227	209	P	P	P	357	357	714	714	714	714	375	153				2530000	2530	Lautenschlager et al. 2016	1		1	0
641	Plateosaurus_engelhardti	Lautenschlager et al. 2016	Plateosaurus_engelhardti			MB.R.1937	Dinosaurs	Dinosaurs	Dinosaurs	FE	estimate	141	90	72	P	P	P	141	141	282	282	282	282	350	123				917470	917.47	Lautenschlager et al. 2016	1		1	1
642	Erlikosaurus_andrewsi	Lautenschlager et al. 2016	Erlikosaurus_andrewsi			IGM 100/111	Dinosaurs	Dinosaurs	Dinosaurs	FE	estimate	108	84	42	P	P	P	108	108	216	216	216	216	265	100				400000	400	Lautenschlager et al. 2016	1		1	0
643	Stegosaurus_stenops	Lautenschlager et al. 2016	Stegosaurus_stenops			NHMUK PV R36730	Dinosaurs	Dinosaurs	Dinosaurs	dry_skull	estimate	445	255	209	P	P	P	445	445	890	890	890	890	375	153				2530000	2530	Lautenschlager et al. 2016	1		1	1
644	Plateosaurus_engelhardti	Lautenschlager et al. 2016	Plateosaurus_engelhardti			MB.R.1937	Dinosaurs	Dinosaurs	Dinosaurs	dry_skull	estimate	121	79	65	P	P	P	121	121	242	242	242	242	350	123				917470	917.47	Lautenschlager et al. 2016	1		1	0
645	Erlikosaurus_andrewsi	Lautenschlager et al. 2016	Erlikosaurus_andrewsi			IGM 100/111	Dinosaurs	Dinosaurs	Dinosaurs	dry_skull	estimate	133	87	64	P	P	P	133	133	266	266	266	266	265	100				400000	400	Lautenschlager et al. 2016	1		1	0
646	Macaca_fascicularis	Curtis et al. 2008	Macaca_fascicularis				Mammals	Mammals	Mammals	MDA	estimate	133.7		95.4	P	P	P	133.7	133.7			133.7	133.7						4569.32	4.56932	Jones et al. 2009	1		1	0
647	Sphenodon_punctatus	Curtis et al. 2010	Sphenodon_punctatus				Reptiles	Reptiles	Reptiles	MDA	estimate			48	A	A	A	48	48			48	48	67.7					778	0.778	Jones and Lappin 2009	1		1	0
648	Saara_hardwickii	Moazen et al. 2008	Uromastyx_hardwickii		Saara_hardwickii		Reptiles	Reptiles	Reptiles	MDA	estimate	51			P	P	P	51	51			51	51	44	41				130.1	0.1301	Meiri 2010	1		1	1
649	Homo_sapiens	Sellers and Crompton 2004	Homo_sapiens				Mammals	Mammals	Mammals	MDA	estimate	1080			P	P	P	1080	1080			1080	1080						58540.6	58.5406	Jones et al. 2009	1		1	1
650	Tupinambis_merianae	Groning et al. 2013	Tupinambis_merianae				Reptiles	Reptiles	Reptiles	in_vivo	in_vivo		314	211	M	M	A	314	314			314	314	88			360		1118	1.118	Meiri 2010	1		1	0
651	Tupinambis_merianae	Groning et al. 2013	Tupinambis_merianae				Reptiles	Reptiles	Reptiles	MDA	estimate	401.9	315	219	P	M	P	401.9	315			401.9	315	88			360		1118	1.118	Meiri 2010	1		1	1
652	Giganotosaurus_carolinii	Mazzetta et al. 2004	Giganotosaurus_carolinii				Dinosaurs	Dinosaurs	Dinosaurs	FE	estimate	13258			P	P	P	13258	13258			13258	13258						6.13677e+06	6136.77	Benson et al. 2014	0	most definitely not maximum bite force - i.e. too low	0	0
653	Tyrannosaurus_rex	Erickson et al. 1996	Tyrannosaurus_rex				Dinosaurs	Dinosaurs	Dinosaurs	tooth_indentation	estimate	13400	6410		P	P	P	13400	13400			13400	13400						8385000	8385	Hutchinson et al. 2011	0	most definitely not maximum bite force - i.e. too low	0	0
654	Deinonychus_antirrhopus	Gignac et al. 2010	Deinonychus_antirrhopus				Dinosaurs	Dinosaurs	Dinosaurs	tooth_indentation	estimate	8200		4100	P	P	P	8200	8200			8200	8200						96654.9	96.6549	Benson et al. 2014	0	questionable estimate - way too high!	0	0
655	Ailurus_fulgens	Christiansen and Adolfssen 2005	Ailurus_fulgens				Mammals	Mammals	Mammals	dry_skull	estimate	335.9		225.7	P	P	P	335.9	335.9			335.9	335.9						5170.08	5.17008	Jones et al. 2009	1		1	0
656	Meles_meles	Christiansen and Adolfssen 2005	Meles_meles				Mammals	Mammals	Mammals	dry_skull	estimate	255.2		184.2	P	P	P	255.2	255.2			255.2	255.2						11884	11.884	Jones et al. 2009	1		1	0
657	Taxidea_taxus	Christiansen and Adolfssen 2005	Taxidea_taxus				Mammals	Mammals	Mammals	dry_skull	estimate	322.8		217.9	P	P	P	322.8	322.8			322.8	322.8						7842.15	7.84215	Jones et al. 2009	1		1	0
658	Gulo_gulo	Christiansen and Adolfssen 2005	Gulo_gulo				Mammals	Mammals	Mammals	dry_skull	estimate	408.3		254.3	P	P	P	408.3	408.3			408.3	408.3						12792.5	12.7925	Jones et al. 2009	1		1	0
659	Nasua_nasua	Christiansen and Adolfssen 2005	Nasua_nasua				Mammals	Mammals	Mammals	dry_skull	estimate	87.1		53.2	P	P	P	87.1	87.1			87.1	87.1						3775.5	3.7755	Jones et al. 2009	1		1	0
660	Procyon_cancrivorus	Christiansen and Adolfssen 2005	Procyon_cancrivorus				Mammals	Mammals	Mammals	dry_skull	estimate	267.5		180.8	P	P	P	267.5	267.5			267.5	267.5						6931.72	6.93172	Jones et al. 2009	1		1	0
661	Procyon_lotor	Christiansen and Adolfssen 2005	Procyon_lotor				Mammals	Mammals	Mammals	dry_skull	estimate	176.4		119.5	P	P	P	176.4	176.4			176.4	176.4						6373.72	6.37372	Jones et al. 2009	1		1	0
662	Tremarctos_ornatus	Christiansen and Adolfssen 2005	Tremarctos_ornatus				Mammals	Mammals	Mammals	dry_skull	estimate	1536.8		1197.2	P	P	P	1536.8	1536.8			1536.8	1536.8						123177	123.177	Jones et al. 2009	1		1	0
663	Helarctos_malayanus	Christiansen and Adolfssen 2005	Ursus_malayanus		Helarctos_malayanus		Mammals	Mammals	Mammals	dry_skull	estimate	1441.7		1131.5	P	P	P	1441.7	1441.7			1441.7	1441.7						57075.8	57.0758	Jones et al. 2009	1		1	0
664	Melursus_ursinus	Christiansen and Adolfssen 2005	Ursus_ursinus		Melursus_ursinus		Mammals	Mammals	Mammals	dry_skull	estimate	708.9		550.4	P	P	P	708.9	708.9			708.9	708.9						100000	100	Jones et al. 2009	1		1	0
665	Ursus_americanus	Christiansen and Adolfssen 2005	Ursus_americanus				Mammals	Mammals	Mammals	dry_skull	estimate	1174.1		869.9	P	P	P	1174.1	1174.1			1174.1	1174.1						110500	110.5	Jones et al. 2009	1		1	0
666	Ursus_thibetanus	Christiansen and Adolfssen 2005	Ursus_thibetanus				Mammals	Mammals	Mammals	dry_skull	estimate	819.8		607.4	P	P	P	819.8	819.8			819.8	819.8						99714.2	99.7142	Jones et al. 2009	1		1	0
667	Ursus_arctos	Christiansen and Adolfssen 2005	Ursus_arctos				Mammals	Mammals	Mammals	dry_skull	estimate	1417.6		1068.6	P	P	P	1417.6	1417.6			1417.6	1417.6						196288	196.287	Jones et al. 2009	1		1	0
668	Ursus_maritimus	Christiansen and Adolfssen 2005	Ursus_maritimus				Mammals	Mammals	Mammals	dry_skull	estimate	2403.9		1730.1	P	P	P	2403.9	2403.9			2403.9	2403.9						371704	371.704	Jones et al. 2009	1		1	0
669	Nyctereutes_procyonoides	Christiansen and Adolfssen 2005	Nyctereutes_procyonoides				Mammals	Mammals	Mammals	dry_skull	estimate	108.9		74.8	P	P	P	108.9	108.9			108.9	108.9						4214.99	4.21499	Jones et al. 2009	1		1	0
670	Otocyon_megalotis	Christiansen and Adolfssen 2005	Otocyon_megalotis				Mammals	Mammals	Mammals	dry_skull	estimate	86.6		59.4	P	P	P	86.6	86.6			86.6	86.6						4098.12	4.09812	Jones et al. 2009	1		1	0
671	Vulpes_zerda	Christiansen and Adolfssen 2005	Fennecus_zerda		Vulpes_zerda		Mammals	Mammals	Mammals	dry_skull	estimate	55.8		32.5	P	P	P	55.8	55.8			55.8	55.8						1317.13	1.31713	Jones et al. 2009	1		1	0
672	Vulpes_lagopus	Christiansen and Adolfssen 2005	Alopex_lagopus		Vulpes_lagopus		Mammals	Mammals	Mammals	dry_skull	estimate	203.7		120.1	P	P	P	203.7	203.7			203.7	203.7						3584.37	3.58437	Jones et al. 2009	1		1	0
673	Vulpes_vulpes	Christiansen and Adolfssen 2005	Vulpes_vulpes				Mammals	Mammals	Mammals	dry_skull	estimate	298.4		170.3	P	P	P	298.4	298.4			298.4	298.4						4820.36	4.82036	Jones et al. 2009	1		1	0
674	Lycaon_pictus	Christiansen and Adolfssen 2005	Lycaon_pictus				Mammals	Mammals	Mammals	dry_skull	estimate	854		550.5	P	P	P	854	854			854	854						22000	22	Jones et al. 2009	1		1	0
675	Speothos_venaticus	Christiansen and Adolfssen 2005	Speothos_venaticus				Mammals	Mammals	Mammals	dry_skull	estimate	272		170.1	P	P	P	272	272			272	272						6324.54	6.32454	Jones et al. 2009	1		1	0
676	Chrysocyon_brachyurus	Christiansen and Adolfssen 2005	Chrysocyon_brachyurus				Mammals	Mammals	Mammals	dry_skull	estimate	725.3		435.6	P	P	P	725.3	725.3			725.3	725.3						23325	23.325	Jones et al. 2009	1		1	0
677	Cuon_alpinus	Christiansen and Adolfssen 2005	Cuon_alpinus				Mammals	Mammals	Mammals	dry_skull	estimate	379		237	P	P	P	379	379			379	379						15800	15.8	Jones et al. 2009	1		1	0
678	Canis_lupus	Christiansen and Adolfssen 2005	Canis_lupus				Mammals	Mammals	Mammals	dry_skull	estimate	1262.3		743	P	P	P	1262.3	1262.3			1262.3	1262.3						31756.5	31.7565	Jones et al. 2009	1		1	0
679	Cerdocyon_thous	Christiansen and Adolfssen 2005	Cerdocyon_thous				Mammals	Mammals	Mammals	dry_skull	estimate	182.7		113.3	P	P	P	182.7	182.7			182.7	182.7						5741.66	5.74166	Jones et al. 2009	1		1	0
680	Lycalopex_gymnocercus	Christiansen and Adolfssen 2005	Dusicyon_gymnocerus		Lycalopex_gymnocercus		Mammals	Mammals	Mammals	dry_skull	estimate	205.4		120.1	P	P	P	205.4	205.4			205.4	205.4						4542.67	4.54267	Jones et al. 2009	1		1	0
681	Lycalopex_vetulus	Christiansen and Adolfssen 2005	Lycalopex_vetulus				Mammals	Mammals	Mammals	dry_skull	estimate	130.5		86	P	P	P	130.5	130.5			130.5	130.5						4233.47	4.23347	Jones et al. 2009	1		1	0
682	Nandinia_binotata	Christiansen and Adolfssen 2005	Nandinia_binotata				Mammals	Mammals	Mammals	dry_skull	estimate	54.1		38	P	P	P	54.1	54.1			54.1	54.1						2167.2	2.1672	Jones et al. 2009	1		1	0
683	Arctictis_binturong	Christiansen and Adolfssen 2005	Arctictis_binturong				Mammals	Mammals	Mammals	dry_skull	estimate	356.7		256.7	P	P	P	356.7	356.7			356.7	356.7						13000	13	Jones et al. 2009	1		1	0
684	Genetta_genetta	Christiansen and Adolfssen 2005	Genetta_genetta				Mammals	Mammals	Mammals	dry_skull	estimate	88.4		50	P	P	P	88.4	88.4			88.4	88.4						1756.17	1.75617	Jones et al. 2009	1		1	0
685	Civettictis_civetta	Christiansen and Adolfssen 2005	Civettictis_civetta				Mammals	Mammals	Mammals	dry_skull	estimate	148.4		104.7	P	P	P	148.4	148.4			148.4	148.4						12075.6	12.0756	Jones et al. 2009	1		1	0
686	Viverricula_indica	Christiansen and Adolfssen 2005	Viverricula_indica				Mammals	Mammals	Mammals	dry_skull	estimate	75.5		44	P	P	P	75.5	75.5			75.5	75.5						2918.88	2.91888	Jones et al. 2009	1		1	0
687	Crocuta_crocuta	Christiansen and Adolfssen 2005	Crocuta_crocuta				Mammals	Mammals	Mammals	dry_skull	estimate	1421.6		782.7	P	P	P	1421.6	1421.6			1421.6	1421.6						63370	63.37	Jones et al. 2009	1		1	0
688	Hyaena_hyaena	Christiansen and Adolfssen 2005	Hyaena_hyaena				Mammals	Mammals	Mammals	dry_skull	estimate	1041.5		576.5	P	P	P	1041.5	1041.5			1041.5	1041.5						35070.5	35.0705	Jones et al. 2009	1		1	0
689	Parahyaena_brunnea	Christiansen and Adolfssen 2005	Hyaena_brunnea		Parahyaena_brunnea		Mammals	Mammals	Mammals	dry_skull	estimate	1222.8		656.2	P	P	P	1222.8	1222.8			1222.8	1222.8						42977.9	42.9779	Jones et al. 2009	1		1	0
690	Neofelis_nebulosa	Christiansen and Adolfssen 2005	Neofelis_nebulosa				Mammals	Mammals	Mammals	dry_skull	estimate	587.8		337.3	P	P	P	587.8	587.8			587.8	587.8						14945	14.945	Jones et al. 2009	1		1	0
691	Panthera_uncia	Christiansen and Adolfssen 2005	Panthera_uncia				Mammals	Mammals	Mammals	dry_skull	estimate	884.8		559.2	P	P	P	884.8	884.8			884.8	884.8						32500	32.5	Jones et al. 2009	1		1	0
692	Panthera_pardus	Christiansen and Adolfssen 2005	Panthera_pardus				Mammals	Mammals	Mammals	dry_skull	estimate	1376.8		841.5	P	P	P	1376.8	1376.8			1376.8	1376.8						52400	52.4	Jones et al. 2009	1		1	0
693	Panthera_leo	Christiansen and Adolfssen 2005	Panthera_leo				Mammals	Mammals	Mammals	dry_skull	estimate	3405.4		2152.3	P	P	P	3405.4	3405.4			3405.4	3405.4						158624	158.624	Jones et al. 2009	1		1	0
694	Panthera_tigris	Christiansen and Adolfssen 2005	Panthera_tigris				Mammals	Mammals	Mammals	dry_skull	estimate	3007.2		1859.3	P	P	P	3007.2	3007.2			3007.2	3007.2						161915	161.915	Jones et al. 2009	1		1	0
695	Panthera_onca	Christiansen and Adolfssen 2005	Panthera_onca				Mammals	Mammals	Mammals	dry_skull	estimate	1253.6		765.9	P	P	P	1253.6	1253.6			1253.6	1253.6						83943.1	83.9431	Jones et al. 2009	1		1	0
696	Leopardus_pardalis	Christiansen and Adolfssen 2005	Leopardus_pardalis				Mammals	Mammals	Mammals	dry_skull	estimate	256.9		164.8	P	P	P	256.9	256.9			256.9	256.9						11880	11.88	Jones et al. 2009	1		1	0
697	Leopardus_wiedii	Christiansen and Adolfssen 2005	Leopardus_wiedii				Mammals	Mammals	Mammals	dry_skull	estimate	112.6		73.5	P	P	P	112.6	112.6			112.6	112.6						3270.81	3.27081	Jones et al. 2009	1		1	0
698	Leopardus_tigrinus	Christiansen and Adolfssen 2005	Leopardus_tigrinus				Mammals	Mammals	Mammals	dry_skull	estimate	110.4		72.4	P	P	P	110.4	110.4			110.4	110.4						2000	2	Jones et al. 2009	1		1	0
699	Leopardus_geoffroyi	Christiansen and Adolfssen 2005	Leopardus_geoffroyi				Mammals	Mammals	Mammals	dry_skull	estimate	180.8		118.3	P	P	P	180.8	180.8			180.8	180.8						4000	4	Jones et al. 2009	1		1	0
700	Lynx_lynx	Christiansen and Adolfssen 2005	Lynx_lynx				Mammals	Mammals	Mammals	dry_skull	estimate	454.9		286.4	P	P	P	454.9	454.9			454.9	454.9						19300	19.3	Jones et al. 2009	1		1	0
701	Acinonyx_jubatus	Christiansen and Adolfssen 2005	Acinonyx_jubatus				Mammals	Mammals	Mammals	dry_skull	estimate	635.1		434.6	P	P	P	635.1	635.1			635.1	635.1						50577.9	50.5779	Jones et al. 2009	1		1	0
702	Puma_concolor	Christiansen and Adolfssen 2005	Puma_concolor				Mammals	Mammals	Mammals	dry_skull	estimate	905.6		584.3	P	P	P	905.6	905.6			905.6	905.6						53954.1	53.9541	Jones et al. 2009	1		1	0
703	Puma_yagouaroundi	Christiansen and Adolfssen 2005	Herpailurus_yagouaroundi		Puma_yagouaroundi		Mammals	Mammals	Mammals	dry_skull	estimate	104.6		66.1	P	P	P	104.6	104.6			104.6	104.6						6875	6.875	Jones et al. 2009	1		1	0
704	Pardofelis_marmorata	Christiansen and Adolfssen 2005	Pardofelis_marmorata				Mammals	Mammals	Mammals	dry_skull	estimate	151.4		96.5	P	P	P	151.4	151.4			151.4	151.4						2826.68	2.82668	Jones et al. 2009	1		1	0
705	Felis_chaus	Christiansen and Adolfssen 2005	Felis_chaus				Mammals	Mammals	Mammals	dry_skull	estimate	294.6		183.4	P	P	P	294.6	294.6			294.6	294.6						7157.99	7.15799	Jones et al. 2009	1		1	0
706	Prionailurus_planiceps	Christiansen and Adolfssen 2005	Ictailurus_planiceps		Prionailurus_planiceps		Mammals	Mammals	Mammals	dry_skull	estimate	172.4		106.2	P	P	P	172.4	172.4			172.4	172.4						3533.76	3.53376	Jones et al. 2009	1		1	0
707	Prionailurus_bengalensis	Christiansen and Adolfssen 2005	Prionailurus_bengalensis				Mammals	Mammals	Mammals	dry_skull	estimate	93.7		58.5	P	P	P	93.7	93.7			93.7	93.7						2780.97	2.78097	Jones et al. 2009	1		1	0
708	Leptailurus_serval	Christiansen and Adolfssen 2005	Leptailurus_serval				Mammals	Mammals	Mammals	dry_skull	estimate	223.2		151.4	P	P	P	223.2	223.2			223.2	223.2						12000	12	Jones et al. 2009	1		1	0
709	Caracal_caracal	Christiansen and Adolfssen 2005	Caracal_caracal				Mammals	Mammals	Mammals	dry_skull	estimate	203.8		136.4	P	P	P	203.8	203.8			203.8	203.8						11964.4	11.9644	Jones et al. 2009	1		1	0
710	Caracal_aurata	Christiansen and Adolfssen 2005	Profelis_aurata		Caracal_aurata		Mammals	Mammals	Mammals	dry_skull	estimate	281.5		185.2	P	P	P	281.5	281.5			281.5	281.5						11277.2	11.2772	Jones et al. 2009	1		1	0
711	Allosaurus_fragilis	Rayfield et al. 2001	Allosaurus_fragilis			DNM 2560	Dinosaurs	Dinosaurs	Dinosaurs	dry_skull	estimate	3572.56	2147.88		P	P	P	3572.56	3572.56			3572.56	3572.56	770	284				1092000	1092	Henderson and Snively 2004	1		1	0
712	Allosaurus_fragilis	Rayfield et al. 2001	Allosaurus_fragilis			MOR 693	Dinosaurs	Dinosaurs	Dinosaurs	FE	estimate		18747		M	M	A	18747	18747			18747	18747						1092000	1092	Henderson and Snively 2004	0	based on skull yielding force - so likely too high as a genuine muscle-driven bite force	0	0
713	Uromastyx_acanthinura	Herrel and Vree 2009	Uromastyx_acanthinurus		Uromastyx_acanthinura		Reptiles	Reptiles	Reptiles	in_vivo	in_vivo			59.2	A	A	A	59.2	59.2			59.2	59.2	31.41			159		600	0.6	Meiri 2010	1		1	1
714	Anolis_sheplani	Huyghe et al. 2007	Anolis_sheplani				Reptiles	Reptiles	Reptiles	in_vivo	in_vivo			1.02	A	A	A	1.02	1.02			1.02	1.02	11.26	4.57	4.46	38.61	M	0.61	0.00061	Huyghe et al. 2007	1		1	1
715	Anolis_sheplani	Huyghe et al. 2007	Anolis_sheplani				Reptiles	Reptiles	Reptiles	in_vivo	in_vivo			0.96	A	A	A	0.96	0.96			0.96	0.96	10.63	4.39	4.27	37.4	F	0.64	0.00064	Huyghe et al. 2007	1		1	0
716	Nimbacinus_dicksoni	Attard et al. 2014	Nimbacinus_dicksoni			QMF36357	Mammals	Mammals	Mammals	dry_skull	estimate			406.81	A	A	A	406.81	406.81			406.81	406.81						5250	5.25	Attard et al. 2014	1		1	0
717	Dasyurus_hallucatus	Attard et al. 2014	Dasyurus_hallucatus			TMM M-6921	Mammals	Mammals	Mammals	dry_skull	estimate			93.7	A	A	A	93.7	93.7			93.7	93.7						780	0.78	Attard et al. 2014	1		1	1
718	Dasyurus_maculatus	Attard et al. 2014	Dasyurus_maculatus			UNSW Z20	Mammals	Mammals	Mammals	dry_skull	estimate			299.81	A	A	A	299.81	299.81			299.81	299.81						2880	2.88	Attard et al. 2014	1		1	0
719	Sarcophilus_harrisii	Attard et al. 2014	Sarcophilus_harrisii			AM10756	Mammals	Mammals	Mammals	dry_skull	estimate			705.84	A	A	A	705.84	705.84			705.84	705.84						14200	14.2	Attard et al. 2014	1		1	1
720	Thylacinus_cynocephalus	Attard et al. 2014	Thylacinus_cynocephalus			AM1821	Mammals	Mammals	Mammals	dry_skull	estimate			835.94	A	A	A	835.94	835.94			835.94	835.94						32490	32.49	Attard et al. 2014	1		1	0
721	Didelphodon_vorax	Wilson et al. 2017	Didelphodon_vorax			NDGS 431	Mammals	Mammals	Mammals	dry_skull	estimate	283.03		217.65	P	P	P	283.03	283.03			283.03	283.03	94.7	59.3				2700	2.7	Wilson et al. 2017	1		1	1
722	Herrerasaurus_ischigualastensis	this study	Herrerasaurus_ischigualastensis	Sereno et al. 1994			Dinosaurs	Dinosaurs	Dinosaurs	dry_skull	estimate	1936.82	1065.8	678.07	P	P	P	1936.82	1936.82			1936.82	1936.82	310	107.7				64330	64.33	Henderson and Snively 2004	1		1	1
723	Coelophysis_bauri	this study	Coelophysis_bauri	Colbert 1989			Dinosaurs	Dinosaurs	Dinosaurs	dry_skull	estimate	288.696	93.6063	71.7321	P	P	P	288.696	288.696			288.696	288.696	207.897	74				12140	12.14	Henderson and Snively 2004	1		1	1
724	Coelophysis_rhodesiensis	this study	Coelophysis_rhodesiensis	Colbert 1989			Dinosaurs	Dinosaurs	Dinosaurs	dry_skull	estimate	392.934	163.573	98.7981	P	P	P	392.934	392.934			392.934	392.934	209.153	77				13052.8	13.0528	Benson et al. 2014	1		1	1
725	Daspletosaurus_torosus	this study	Daspletosaurus_torosus	Russell 1970		FMNH PR308	Dinosaurs	Dinosaurs	Dinosaurs	dry_skull	estimate	16206.3	9865.82	8166.02	P	P	P	16206.3	16206.3			16206.3	16206.3	1050	430				3844000	3844	Henderson and Snively 2004	1		1	0
726	Daspletosaurus_torosus	this study	Daspletosaurus_torosus	Russell 1970		NMC 8506	Dinosaurs	Dinosaurs	Dinosaurs	dry_skull	estimate	16641.3	10130.6	8385.22	P	P	P	16641.3	16641.3			16641.3	16641.3	1036	452				3844000	3844	Henderson and Snively 2004	1		1	1
727	Gorgosaurus_libratus	this study	Gorgosaurus_libratus	Russell 1970		USNM 12814	Dinosaurs	Dinosaurs	Dinosaurs	dry_skull	estimate	13816.8	8325.29	6417.95	P	P	P	13816.8	13816.8			13816.8	13816.8	795	390				2795000	2795	Henderson and Snively 2004	1		1	1
728	Euparkeria_capensis	this study	Euparkeria_capensis	Ewer 1965			Reptiles	Reptiles	Reptiles	dry_skull	estimate	215.882	112.218	85.8344	P	P	P	215.882	215.882			215.882	215.882	83	49				613.5	0.6135	Henderson and Snively 2004	1		1	1
729	Lesothosaurus_diagnosticus	this study	Lesothosaurus_diagnosticus	Sereno 1991a/Nesbitt 2011			Dinosaurs	Dinosaurs	Dinosaurs	dry_skull	estimate	249.658	137.613	98.743	P	P	P	249.658	249.658			249.658	249.658	102	54	44			6314.03	6.31403	Benson et al. 2014	1		1	1
730	Ornithosuchus_woodwardi	this study	Ornithosuchus_woodwardi	Sereno 1991b/Walker 1964			Reptiles	Reptiles	Reptiles	dry_skull	estimate	7145.9	4089.91	2910.28	P	P	P	7145.9	7145.9			7145.9	7145.9	460	260	169			323802	323.802	Campione and Evans 2012; regression equation for reptiles using femur length = 87mm * 4 from Walker (1964)	1		1	1
731	Riojasuchus_tenuisceps	this study	Riojasuchus_tenuisceps	Sereno 1991b/Nesbitt 2011			Reptiles	Reptiles	Reptiles	dry_skull	estimate	231.844	136.715	108.865	P	P	P	231.844	231.844			231.844	231.844	97	55	36			13770	13.77	Henderson and Snively 2004	1		1	1
732	Parasuchus_hislopi	this study	Parasuchus_hislopi	Sereno 1991b/Chatterjee 1978			Reptiles	Reptiles	Reptiles	dry_skull	estimate	1958.5	708.58	449.879	P	P	P	1958.5	1958.5			1958.5	1958.5	593	183	88			191019	191.019	Campione and Evans 2012; regression equation for reptiles using femur lengths measured from Chatterjee 1978	1		1	1

## Sheet: REFERENCES
Aguirre et al. 2002	Aguirre, L. F.; Herrel, A.; van Damme, R.; Matthysen, E., Proc. R. Soc. Lond. B. Biol. Sci. 2002, 269, 1271-1278.
Attard et al. 2014	Attard, M. R. G.; Parr, W. C. H.; Wilson, L. A. B.; Archer, M.; Hand, S. J.; Rogers, T. L.; Wroe, S., PLoS One 2014, 9 (4), e93088. DOI 10.1371/journal.pone.0093088.
Bates and Falkingham 2012	Bates, K. T.; Falkingham, P. L., Biol. Lett. 2012, 8, 660-664.
Binder and Van Valkenburgh 2000	Binder, W. J.; Van Valkenburgh, B., J. Zool. 2000, 252, 273-283.
Bourke et al. 2008	Bourke, J.; Wroe, S.; Moreno, K.; McHenry, C.; Clausen, P., PLoS One 2008, 3 (5), e2200. DOI 10.1371/journal.pone.0002200.
Bousdras et al. 2006	Bousdras, V. A.; Cunningham, J. L.; Ferguson-Pell, M.; Bamber, M. A.; Sindet-Pedersen, S.; Blunn, G.; Goodship, A. E., Int. J. Oral Maxillofac. Surg. 2006, 35 (7), 663-667. DOI https://doi.org/10.1016/j.ijom.2006.01.023.
Carril et al. 2015	Carril, J.; Ronderos, J. R.; Tambussi, C. P.; Chiale, M. C., Zoology 2016, 119 (6), 534-540. DOI https://doi.org/10.1016/j.zool.2016.06.006.
Christiansen and Adolfssen 2005	Christiansen, P.; Adolfssen, J. S., J. Zool. 2005, 266, 133-151.
Christiansen and Wroe2007	Christiansen, P.; Wroe, S., Ecology 2007, 88 (2), 347-358.
Constantino et al. 2010	Constantino, P. J.; Lee, J. J.-W.; Chai, H.; Zipfel, B.; Ziscovici, C.; Lawn, B. R.; Lucas, P. W., Biol. Lett. 2010, 6, 826-829.
Cox et al. 2012	Cox, P. G.; Rayfield, E. J.; Fagan, M. J.; Herrel, A.; Pataky, T. C.; Jeffery, N., PLoS One 2012, 7 (4), e36299. DOI 10.1371/journal.pone.0036299.
Curtis et al. 2008	Curtis, N.; Kupczik, K.; O'Higgins, P.; Moazen, M.; Fagan, M., The Anatomical Record: Advances in Integrative Anatomy and Evolutionary Biology 2008, 291 (5), 491-501. DOI 10.1002/ar.20689.
Curtis et al. 2010	Curtis, N.; Jones, M. E. H.; Evans, S. E.; Shi, J. F.; O'Higgins, P.; Fagan, M. J., Journal of the Royal Society Interface 2010, 7 (42), 153-160. DOI Doi 10.1098/Rsif.2009.0139.
Degrange et al. 2010	Degrange, F. J.; Tambussi, C. P.; Moreno, K.; Witmer, L. M.; Wroe, S., PLoS One 2010, 5 (8), e11856. DOI 10.1371/journal.pone.0011856.
Demes and Creel 1988	Demes, B.; Creel, N., J. Hum. Evol. 1988, 17 (7), 657-670. DOI http://dx.doi.org/10.1016/0047-2484(88)90023-1.
Dumont and Herrel 2003	Dumont, E. R.; Herrel, A., J. Exp. Biol. 2003, 206, 2117-2123.
Eng et al. 2013	Eng, C. M.; Lieberman, D. E.; Zink, K. D.; Peters, M. A., Am. J. Phys. Anthropol. 2013, 151 (4), 544-557. DOI 10.1002/ajpa.22296.
Erickson et al. 1996	Erickson, G. M.; VanKirk, S. D.; Su, J. T.; Levenston, M. E.; Caler, W. E.; Carter, D. R., Nature 1996, 382 (6593), 706-708.
Erickson et al. 2012	Erickson, G. M.; Gignac, P. M.; Steppan, S. J.; Lappin, A. K.; Vliet, K. A.; Brueggen, J. D.; Inouye, B. D.; Kledzik, D.; Webb, G. J. W., PLoS One 2012, 7 (3), e31781. DOI 10.1371/journal.pone.0031781.
Genbrugge et al. 2011	Genbrugge, A.; Herrel, A.; Boone, M.; Van Hoorebeke, L.; Podos, J.; Dirckx, J.; Aerts, P.; Dominique, A., J. Anat. 2011, 219 (6), 676-695. DOI 10.1111/j.1469-7580.2011.01437.x.
Gignac et al. 2010	Gignac, P. M.; Makovicky, P. J.; Erickson, G. M.; Walsh, R. P., Journal Of Vertebrate Paleontology 2010, 30 (4), 1169-1177. DOI Doi 10.1080/02724634.2010.483535
Groning et al. 2013	Gršning, F.; Jones, M. E. H.; Curtis, N.; Herrel, A.; O'Higgins, P.; Evans, S. E.; Fagan, M. J., Journal of The Royal Society Interface 2013, 10.
Gussekloo and Bout 2005	Gussekloo, S. W. S.; Bout, R. G., J. Exp. Biol. 2005, 208 (17), 3409-3419.
Hartstone-Rose et al. 2012	Hartstone-Rose, A.; Perry, J. M. G.; Morrow, C. J., The Anatomical Record: Advances in Integrative Anatomy and Evolutionary Biology 2012, 295 (8), 1336-1351. DOI 10.1002/ar.22518.
Herrel and O'Reilly 2006	Herrel, A.; O'Reilly, J. C., Physiol. Biochem. Zool. 2006, 79 (1), 31-42.
Herrel and De Vree 2009	Herrel, A.; De Vree, F., Arch. Oral Biol. 2009, 54 (8), 772-782. DOI https://doi.org/10.1016/j.archoralbio.2009.05.002.
Herrel et al. 1998	Herrel, A.; Aerts, P.; De Vree, F., J. Zool. 1998, 244, 135-143.
Herrel et al. 1999	Herrel, A.; Spithoven, L.; Van Damme, R.; De Vree, F., Funct. Ecol. 1999, 13 (3), 289-297.
Herrel et al. 2001	Herrel, A.; De Grauw, E.; Lemos-Espinal, J. A., J. Exp. Zool. 2001, 290 (2), 101-107.
Herrel et al. 2002	Herrel, A.; O'Reilly, J. C.; Richmond, A. M., J. Evol. Biol. 2002, 15 (6), 1083-1094.
Herrel et al. 2005	Herrel, A.; Podos, J.; Huber, S. K.; Hendry, A. P., J. Evol. Biol. 2005, 18 (3), 669-675.
Herrel et al. 2010	Herrel, A.; Moore, J. A.; Bredeweg, E. M.; Nelson, N. J., Biological Journal of the Linnean Society 2010, 100 (2), 287-292. DOI 10.1111/j.1095-8312.2010.01433.x.
Huyghe et al. 2007	Huyghe, K.; Herrel, A.; Vanhooydonck, B.; Meyers, J. J.; Irschick, D. J., Zoology 2007, 110 (1), 2-8. DOI https://doi.org/10.1016/j.zool.2006.06.001.
Jones and Lappin 2009	Jones, M. E. H.; Lappin, A. K., Journal of the Royal Society of New Zealand 2009, 39 (2-3), 71-83. DOI 10.1080/03014220909510565.
Lautenschlager 2013	Lautenschlager, S., J. Anat. 2013, 222 (2), 260-272. DOI 10.1111/joa.12000.
Lautenschlager et al. 2016	Lautenschlager, S.; Brassey, C. A.; Button, D. J.; Barrett, P. M., Sci. Rep. 2016, 6, 26495. DOI 10.1038/srep26495
Mazzetta et al. 2004	Mazzetta, G. V.; Blanco, R. E.; Cisilino, A. P., Ameghiniana 2004, 41 (4), 619-626.
Mazzetta et al. 2009	Mazzetta, G. V.; Cisilino, A. P.; Blanco, R. E.; Calvo, N., Journal Of Vertebrate Paleontology 2009, 29 (3), 822--830.
McHenry et al. 2007	McHenry, C. R.; Wroe, S.; Clausen, P. D.; Moreno, K.; Cunningham, E., Proc. Natl. Acad. Sci. U. S. A. 2007, 104, 16010--16015.
Moazen et al. 2008	Moazen, M.; Curtis, N.; Evans, S. E.; O'Higgins, P.; Fagan, M. J., J. Biomech. 2008, 41 (6), 1274-1280.
Perry et al. 2011	Perry, J. M. G.; Hartstone-Rose, A.; Logan, R. L., The Jaw Adductor Resultant and Estimated Bite Force in Primates. 2011; Vol. 2011, p 11.
Rayfield et al. 2001	Rayfield, E. J.; Norman, D. B.; Horner, C. C.; Horner, J. R.; Smith, P. M.; Thomason, J. J.; Upchurch, P., Nature 2001, 409 (6823), 1033-1037.
Reichel 2010	Reichel, M., Swiss Journal of Geosciences 2010, 103 (2), 235-240. DOI 10.1007/s00015-010-0025-1.
Ringqvist 1972	Ringqvist, M., Acta Odontol. Scand. 1973, 31 (1), 35-42. DOI 10.3109/00016357309004611.
Robins 1977	Robins, M. W., Arch. Oral Biol. 1977, 22 (1), 43-47. DOI http://dx.doi.org/10.1016/0003-9969(77)90138-8.
Santana et al. 2016	Santana, S. E., Funct. Ecol. 2016, 30 (4), 557-565. DOI 10.1111/1365-2435.12522.
Sellers and Crompton 2004	Sellers, W. I.; Crompton, R. H., Annals of Anatomy - Anatomischer Anzeiger 2004, 186 (1), 89-95. DOI http://dx.doi.org/10.1016/S0940-9602(04)80132-8.
Senawi et al. 2015	Senawi, J.; Schmieder, D.; Siemers, B.; Kingston, T., Funct. Ecol. 2015, 29 (11), 1411-1420. DOI 10.1111/1365-2435.12447.
Sustaita and Hertel 2010	Sustaita, D.; Hertel, F., The Journal of Experimental Biology 2010, 213, 2617-2628.
Thomas et al. 2015	Thomas, P.; Pouydebat, E.; Hardy, I.; Aujard, F.; Ross, C. F.; Herrel, A., J. Zool. 2015, 296 (2), 133-138. DOI 10.1111/jzo.12225.
Thomason et al. 1990	Thomason, J. J.; Russell, A. P.; Morgeli, M., Canadian Journal of Zoology-Revue Canadienne De Zoologie 1990, 68 (2), 318-324.
Thompson et al. 2003	Thompson, E. N.; Biknevicius, A. R.; German, R. Z., J. Exp. Biol. 2003, 206 (5), 923.
van der Bilt et al. 2008	van der Bilt, A.; Tekamp, A.; van der Glas, H.; Abbink, J., Eur. J. Oral Sci. 2008, 116 (3), 217-222.
van der Meijj and Bout 2004	van der Meij, M. A. A.; Bout, R. G., J. Exp. Biol. 2004, 207 (16), 2745-2753.
Watson et al. 2014	Watson, P. J.; Gršning, F.; Curtis, N.; Fitton, L. C.; Herrel, A.; McCormack, S. W.; Fagan, M. J., Journal of The Royal Society Interface 2014, 11.
Wilson et al. 2016	Wilson, G. P.; Ekdale, E. G.; Hoganson, J. W.; Calede, J. J.; Vander Linden, A., Nature Communications 2016, 7, 13734. DOI 10.1038/ncomms13734
Wittorski et al. 2015	Wittorski, A.; Losos, J. B.; Herrel, A., J. Anat. 2016, 228 (1), 85-95. DOI 10.1111/joa.12394.
Wroe et al. 2005	Wroe, S.; McHenry, C.; Thomason, J., Proceedings of the Royal Society B-Biological Sciences 2005, 272 (1563), 619-625.
Benson et al. 2014	Benson, R. B.; Campione, N. E.; Carrano, M. T.; Mannion, P. D.; Sullivan, C.; Upchurch, P.; Evans, D. C., PLoS Biol. 2014, 12 (5), e1001853. DOI 10.1371/journal.pbio.1001853.
Campione and Evans 2012	Campione, N. E.; Evans, D. C., BMC Biol. 2012, 10 (1), 60. DOI 10.1186/1741-7007-10-60.
Foth et al. 2014	Foth, C.; Tischlinger, H.; Rauhut, O. W. M., Nature 2014, 511 (7507), 79-82. DOI 10.1038/nature13467
Henderson 1999	Henderson, D. M., Paleobiology 1999, 25 (1), 88-106.
Henderson and Snively 2004	Henderson, D. M.; Snively, E., Proceedings Of The Royal Society Of London Series B-Biological Sciences 2004, 271, S57-S60.
Hutchinson et al. 2011	Hutchinson, J. R.; Bates, K. T.; Molnar, J.; Allen, V.; Makovicky, P. J., PLoS One 2011, 6 (10), e26037. DOI 10.1371/journal.pone.0026037.
Jones et al. 2009	Jones, K. E.; Bielby, J.; Cardillo, M.; Fritz, S. A.; O'Dell, J.; Orme, C. D. L.; Safi, K.; Sechrest, W.; Boakes, E. H.; Carbone, C.; Connolly, C.; Cutts, M. J.; Foster, J. K.; Grenyer, R.; Habib, M.; Plaster, C. A.; Price, S. A.; Rigby, E. A.; Rist, J.; Teacher, A.; Bininda-Emonds, O. R. P.; Gittleman, J. L.; Mace, G. M.; Purvis, A.; Michener, W. K., Ecology 2009, 90 (9), 2648-2648. DOI 10.1890/…
Meiri 2010	Meiri, S., J. Zool. 2010, 281 (3), 218-226. DOI 10.1111/j.1469-7998.2010.00696.x.
Paul 1988	Paul, G. S., Predatory dinosaurs of the world. Simon and Schuster: 1988.
Sampson and Witmer 2007	Sampson, S. D.; Witmer, L. M., Journal of Vertebrate Paleontology 2007, 27 (2), 32-U3.
